# Supplementary material for: Immune landscape and heterogeneity of cervical squamous cell carcinoma and adenocarcinoma
Source: Aging (Albany NY). 2024 Jan 10;16(1):568–92. doi: 10.18632/aging.205397 (PMC10817369; doi:10.18632/aging.205397)
Supplement: Supplementary Figures [file aging-16-205397-s001.pdf]

## SUPPLEMENTARY FIGURES

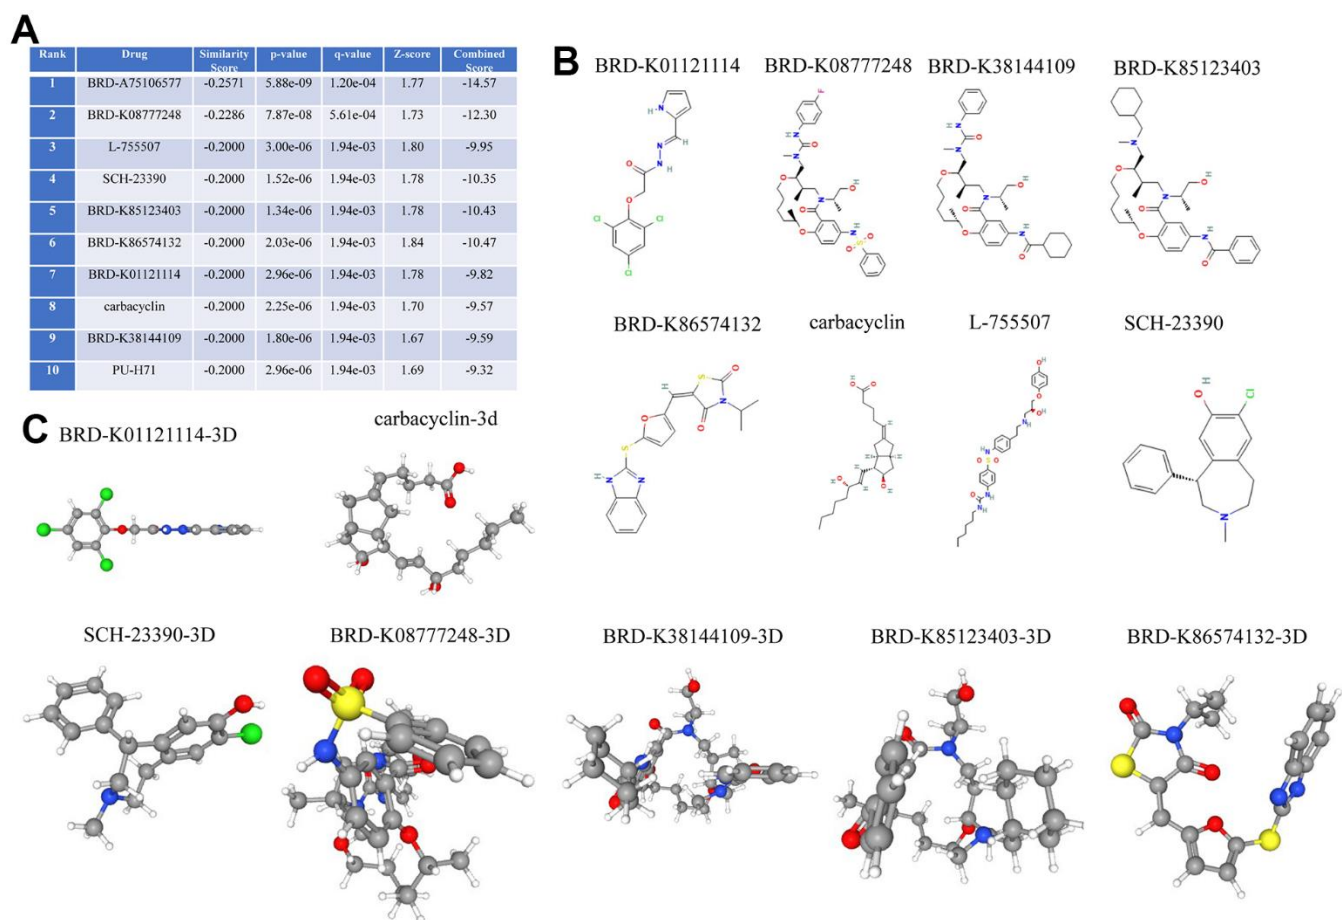

**Supplementary Figure 1. The characteristics of ten potential small molecule drugs identified by L1000FWD. (A)** The ten identified small molecule drugs based on the similarity scores. **(B)** The two-dimensional architectures of some identified small molecule drugs. **(C)** The three-dimensional architectures of some identified small molecule drugs.

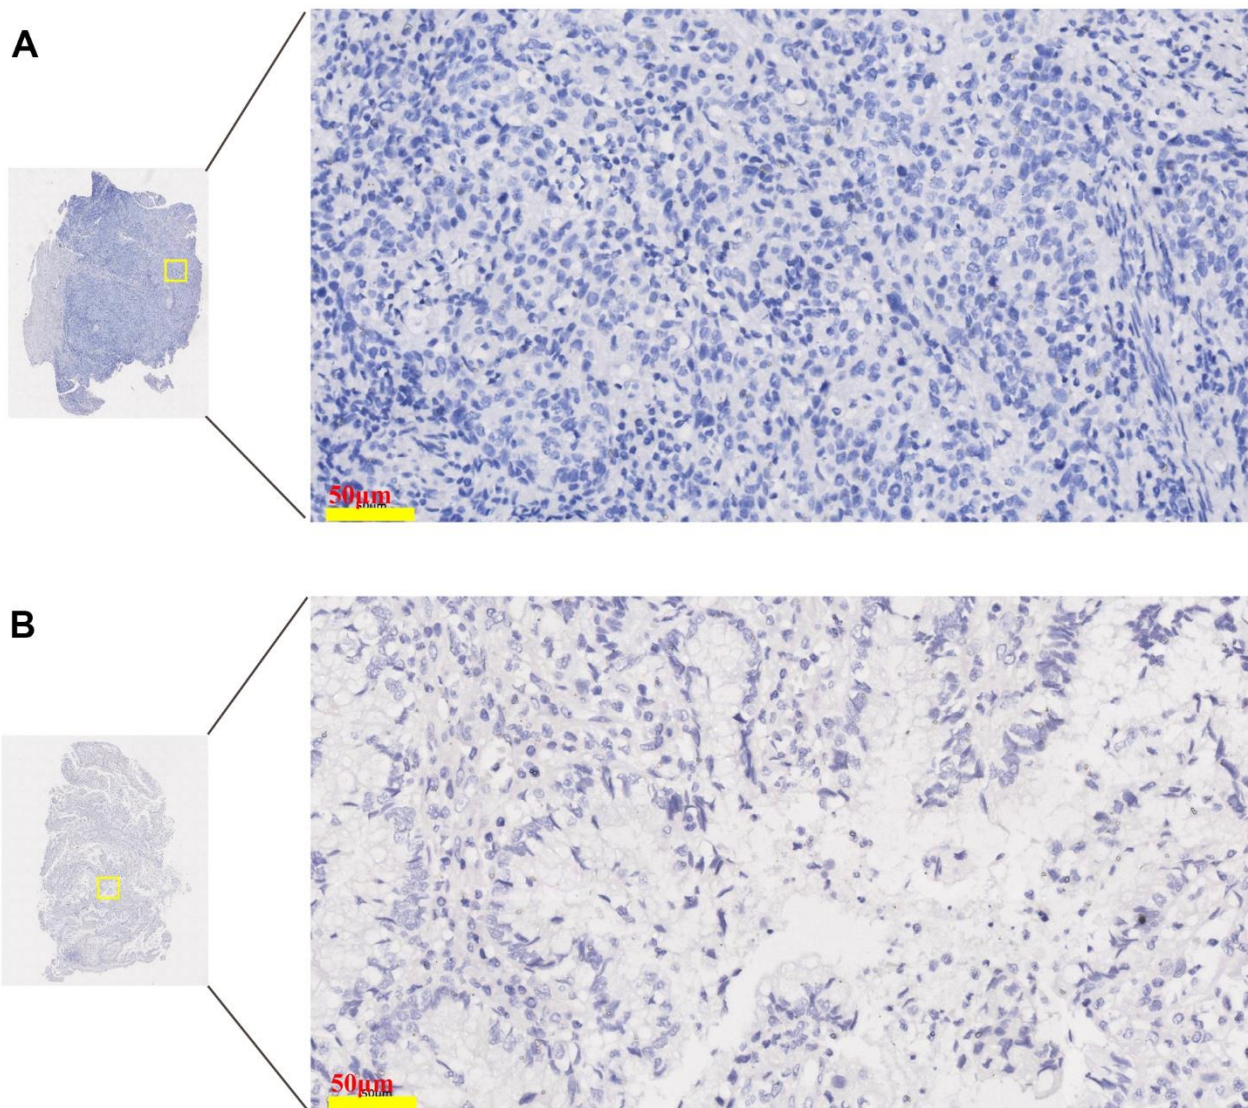

**Supplementary Figure 2. Negative immunohistochemistry staining of CD8A and CD20 in collected cervical samples.**  
 (A) Negative immunohistochemistry staining in CSCC samples. (B) Negative immunohistochemistry staining in ADC samples.
