# Supplementary material for: Immune landscape and heterogeneity of cervical squamous cell carcinoma and adenocarcinoma
Source: Aging (Albany NY). 2024 Jan 10;16(1):568–92. doi: 10.18632/aging.205397 (PMC10817369; doi:10.18632/aging.205397)
Supplement: Supplementary Table 1 [file aging-16-205397-s002.xlsx]

## Sheet: Sheet1
	Supplementary Table 1. Pathological types of 299 cervical patients included
	bcr_patient_barcode	pathological type
	TCGA-ZX-AA5X	CSCC
	TCGA-ZJ-AB0I	CSCC
	TCGA-ZJ-AB0H	CSCC
	TCGA-ZJ-AAXU	CSCC
	TCGA-ZJ-AAXT	CSCC
	TCGA-ZJ-AAXN	CSCC
	TCGA-ZJ-AAXJ	CSCC
	TCGA-ZJ-AAXI	CSCC
	TCGA-ZJ-AAXF	CSCC
	TCGA-ZJ-AAXD	CSCC
	TCGA-ZJ-AAXB	ADC
	TCGA-ZJ-AAXA	CSCC
	TCGA-ZJ-AAX8	CSCC
	TCGA-ZJ-AAX4	CSCC
	TCGA-ZJ-A8QR	CSCC
	TCGA-ZJ-A8QQ	CSCC
	TCGA-ZJ-A8QO	CSCC
	TCGA-XS-A8TJ	CSCC
	TCGA-WL-A834	CSCC
	TCGA-VS-AA62	CSCC
	TCGA-VS-A9V5	ADC
	TCGA-VS-A9V4	ADC
	TCGA-VS-A9V3	CSCC
	TCGA-VS-A9V2	CSCC
	TCGA-VS-A9V1	ADC
	TCGA-VS-A9V0	ADC
	TCGA-VS-A9UZ	ADC
	TCGA-VS-A9UY	CSCC
	TCGA-VS-A9UV	CSCC
	TCGA-VS-A9UU	CSCC
	TCGA-VS-A9UT	ADC
	TCGA-VS-A9UR	ADC
	TCGA-VS-A9UQ	ADC
	TCGA-VS-A9UP	ADC
	TCGA-VS-A9UO	ADC
	TCGA-VS-A9UM	CSCC
	TCGA-VS-A9UL	CSCC
	TCGA-VS-A9UJ	CSCC
	TCGA-VS-A9UI	CSCC
	TCGA-VS-A9UH	CSCC
	TCGA-VS-A9UD	CSCC
	TCGA-VS-A9UC	CSCC
	TCGA-VS-A9UB	CSCC
	TCGA-VS-A9U7	CSCC
	TCGA-VS-A9U6	CSCC
	TCGA-VS-A9U5	CSCC
	TCGA-VS-A959	CSCC
	TCGA-VS-A958	CSCC
	TCGA-VS-A957	CSCC
	TCGA-VS-A954	CSCC
	TCGA-VS-A953	CSCC
	TCGA-VS-A952	ADC
	TCGA-VS-A950	CSCC
	TCGA-VS-A94Z	CSCC
	TCGA-VS-A94Y	CSCC
	TCGA-VS-A94X	CSCC
	TCGA-VS-A94W	CSCC
	TCGA-VS-A8QM	CSCC
	TCGA-VS-A8QH	ADC
	TCGA-VS-A8QF	CSCC
	TCGA-VS-A8QC	CSCC
	TCGA-VS-A8QA	CSCC
	TCGA-VS-A8Q9	CSCC
	TCGA-VS-A8Q8	CSCC
	TCGA-VS-A8EL	CSCC
	TCGA-VS-A8EK	CSCC
	TCGA-VS-A8EJ	CSCC
	TCGA-VS-A8EI	CSCC
	TCGA-VS-A8EH	CSCC
	TCGA-VS-A8EG	CSCC
	TCGA-VS-A8EC	CSCC
	TCGA-VS-A8EB	CSCC
	TCGA-UC-A7PI	ADC
	TCGA-UC-A7PG	CSCC
	TCGA-UC-A7PF	CSCC
	TCGA-UC-A7PD	CSCC
	TCGA-RA-A741	CSCC
	TCGA-R2-A69V	CSCC
	TCGA-Q1-A73R	ADC
	TCGA-Q1-A73Q	CSCC
	TCGA-Q1-A73P	ADC
	TCGA-Q1-A73O	CSCC
	TCGA-Q1-A6DW	CSCC
	TCGA-Q1-A6DV	ADC
	TCGA-Q1-A6DT	CSCC
	TCGA-Q1-A5R3	CSCC
	TCGA-Q1-A5R2	CSCC
	TCGA-Q1-A5R1	ADC
	TCGA-PN-A8MA	CSCC
	TCGA-MY-A913	CSCC
	TCGA-MY-A5BF	CSCC
	TCGA-MY-A5BE	CSCC
	TCGA-MY-A5BD	CSCC
	TCGA-MU-A8JM	CSCC
	TCGA-MU-A5YI	CSCC
	TCGA-MU-A51Y	CSCC
	TCGA-MA-AA43	CSCC
	TCGA-MA-AA42	CSCC
	TCGA-MA-AA41	CSCC
	TCGA-MA-AA3Z	CSCC
	TCGA-MA-AA3Y	CSCC
	TCGA-MA-AA3X	CSCC
	TCGA-MA-AA3W	CSCC
	TCGA-LP-A7HU	ADC
	TCGA-LP-A5U3	CSCC
	TCGA-LP-A5U2	ADC
	TCGA-LP-A4AX	CSCC
	TCGA-LP-A4AW	CSCC
	TCGA-LP-A4AV	CSCC
	TCGA-LP-A4AU	CSCC
	TCGA-JX-A5QV	CSCC
	TCGA-JX-A3Q8	ADC
	TCGA-JX-A3Q0	CSCC
	TCGA-JX-A3PZ	CSCC
	TCGA-JW-AAVH	CSCC
	TCGA-JW-A852	CSCC
	TCGA-JW-A69B	ADC
	TCGA-JW-A5VL	CSCC
	TCGA-JW-A5VK	CSCC
	TCGA-JW-A5VJ	CSCC
	TCGA-JW-A5VI	CSCC
	TCGA-JW-A5VH	CSCC
	TCGA-JW-A5VG	CSCC
	TCGA-IR-A3LL	CSCC
	TCGA-IR-A3LK	CSCC
	TCGA-IR-A3LI	ADC
	TCGA-IR-A3LH	CSCC
	TCGA-IR-A3LF	ADC
	TCGA-IR-A3LC	CSCC
	TCGA-IR-A3LB	ADC
	TCGA-IR-A3LA	ADC
	TCGA-IR-A3L7	CSCC
	TCGA-HM-A4S6	CSCC
	TCGA-HM-A3JK	CSCC
	TCGA-HM-A3JJ	CSCC
	TCGA-HG-A2PA	CSCC
	TCGA-GH-A9DA	CSCC
	TCGA-FU-A770	ADC
	TCGA-FU-A5XV	CSCC
	TCGA-FU-A57G	ADC
	TCGA-FU-A40J	ADC
	TCGA-FU-A3YQ	CSCC
	TCGA-FU-A3WB	CSCC
	TCGA-FU-A3TX	CSCC
	TCGA-FU-A3TQ	CSCC
	TCGA-FU-A3NI	CSCC
	TCGA-FU-A3HZ	CSCC
	TCGA-FU-A3HY	CSCC
	TCGA-FU-A3EO	ADC
	TCGA-FU-A2QG	CSCC
	TCGA-FU-A23L	CSCC
	TCGA-FU-A23K	CSCC
	TCGA-EX-A8YF	CSCC
	TCGA-EX-A69M	CSCC
	TCGA-EX-A69L	CSCC
	TCGA-EX-A449	ADC
	TCGA-EX-A3L1	CSCC
	TCGA-EX-A1H6	ADC
	TCGA-EX-A1H5	CSCC
	TCGA-EK-A3GN	CSCC
	TCGA-EK-A3GM	ADC
	TCGA-EK-A3GK	ADC
	TCGA-EK-A3GJ	CSCC
	TCGA-EK-A2RO	CSCC
	TCGA-EK-A2RN	CSCC
	TCGA-EK-A2RM	CSCC
	TCGA-EK-A2RL	ADC
	TCGA-EK-A2RK	CSCC
	TCGA-EK-A2RJ	CSCC
	TCGA-EK-A2RE	CSCC
	TCGA-EK-A2RC	CSCC
	TCGA-EK-A2RB	CSCC
	TCGA-EK-A2RA	CSCC
	TCGA-EK-A2R9	CSCC
	TCGA-EK-A2R8	CSCC
	TCGA-EK-A2R7	CSCC
	TCGA-EK-A2PM	CSCC
	TCGA-EK-A2PL	CSCC
	TCGA-EK-A2PK	CSCC
	TCGA-EK-A2PI	CSCC
	TCGA-EK-A2PG	CSCC
	TCGA-EK-A2IR	CSCC
	TCGA-EK-A2IP	CSCC
	TCGA-EK-A2H1	CSCC
	TCGA-EK-A2H0	CSCC
	TCGA-EK-A2GZ	CSCC
	TCGA-EA-A97N	CSCC
	TCGA-EA-A78R	CSCC
	TCGA-EA-A6QX	CSCC
	TCGA-EA-A5ZF	CSCC
	TCGA-EA-A5ZE	CSCC
	TCGA-EA-A5ZD	CSCC
	TCGA-EA-A5O9	CSCC
	TCGA-EA-A5FO	CSCC
	TCGA-EA-A556	ADC
	TCGA-EA-A50E	CSCC
	TCGA-EA-A4BA	ADC
	TCGA-EA-A44S	CSCC
	TCGA-EA-A43B	CSCC
	TCGA-EA-A439	CSCC
	TCGA-EA-A411	CSCC
	TCGA-EA-A410	CSCC
	TCGA-EA-A3Y4	CSCC
	TCGA-EA-A3QE	CSCC
	TCGA-EA-A3QD	CSCC
	TCGA-EA-A3HU	CSCC
	TCGA-EA-A3HT	CSCC
	TCGA-EA-A3HS	CSCC
	TCGA-EA-A3HR	CSCC
	TCGA-EA-A3HQ	CSCC
	TCGA-EA-A1QT	CSCC
	TCGA-EA-A1QS	CSCC
	TCGA-DS-A7WI	CSCC
	TCGA-DS-A7WH	ADC
	TCGA-DS-A5RQ	CSCC
	TCGA-DS-A3LQ	CSCC
	TCGA-DS-A1OD	CSCC
	TCGA-DS-A1OC	CSCC
	TCGA-DS-A1OB	CSCC
	TCGA-DS-A1OA	CSCC
	TCGA-DS-A1O9	CSCC
	TCGA-DS-A0VN	CSCC
	TCGA-DS-A0VM	CSCC
	TCGA-DS-A0VL	CSCC
	TCGA-DS-A0VK	CSCC
	TCGA-DR-A0ZM	CSCC
	TCGA-DR-A0ZL	CSCC
	TCGA-DG-A2KM	CSCC
	TCGA-DG-A2KL	CSCC
	TCGA-DG-A2KK	CSCC
	TCGA-DG-A2KJ	CSCC
	TCGA-C5-A907	CSCC
	TCGA-C5-A905	CSCC
	TCGA-C5-A902	CSCC
	TCGA-C5-A901	CSCC
	TCGA-C5-A8ZZ	CSCC
	TCGA-C5-A8YT	CSCC
	TCGA-C5-A8YR	CSCC
	TCGA-C5-A8YQ	CSCC
	TCGA-C5-A8XK	CSCC
	TCGA-C5-A8XJ	CSCC
	TCGA-C5-A8XI	CSCC
	TCGA-C5-A8XH	CSCC
	TCGA-C5-A7XC	CSCC
	TCGA-C5-A7X8	ADC
	TCGA-C5-A7X5	CSCC
	TCGA-C5-A7X3	CSCC
	TCGA-C5-A7UI	CSCC
	TCGA-C5-A7UH	CSCC
	TCGA-C5-A7UE	CSCC
	TCGA-C5-A7UC	CSCC
	TCGA-C5-A7CO	CSCC
	TCGA-C5-A7CM	ADC
	TCGA-C5-A7CL	CSCC
	TCGA-C5-A7CK	CSCC
	TCGA-C5-A7CJ	CSCC
	TCGA-C5-A7CH	CSCC
	TCGA-C5-A7CG	CSCC
	TCGA-C5-A3HL	CSCC
	TCGA-C5-A3HF	ADC
	TCGA-C5-A3HE	CSCC
	TCGA-C5-A3HD	CSCC
	TCGA-C5-A2M2	ADC
	TCGA-C5-A2M1	ADC
	TCGA-C5-A2LZ	CSCC
	TCGA-C5-A2LY	CSCC
	TCGA-C5-A2LX	CSCC
	TCGA-C5-A2LV	CSCC
	TCGA-C5-A2LT	CSCC
	TCGA-C5-A2LS	ADC
	TCGA-C5-A1MQ	CSCC
	TCGA-C5-A1MP	CSCC
	TCGA-C5-A1MN	CSCC
	TCGA-C5-A1ML	CSCC
	TCGA-C5-A1MK	CSCC
	TCGA-C5-A1MJ	ADC
	TCGA-C5-A1MI	CSCC
	TCGA-C5-A1MH	CSCC
	TCGA-C5-A1MF	CSCC
	TCGA-C5-A1ME	ADC
	TCGA-C5-A1M9	ADC
	TCGA-C5-A1M8	CSCC
	TCGA-C5-A1M7	CSCC
	TCGA-C5-A1M6	CSCC
	TCGA-C5-A1M5	CSCC
	TCGA-C5-A1BQ	CSCC
	TCGA-C5-A1BN	CSCC
	TCGA-C5-A1BM	CSCC
	TCGA-C5-A1BL	CSCC
	TCGA-C5-A1BK	CSCC
	TCGA-C5-A1BJ	CSCC
	TCGA-C5-A1BI	CSCC
	TCGA-C5-A1BF	CSCC
	TCGA-C5-A1BE	CSCC
	TCGA-C5-A0TN	CSCC
	TCGA-BI-A20A	CSCC
	TCGA-BI-A0VS	CSCC
	TCGA-BI-A0VR	CSCC
	TCGA-4J-AA1J	CSCC
	CSCC: Cervical Squamous Cell Carcinoma; ADC: Cervical Adenocarcinoma.
