# Supplementary material for: Immune landscape and heterogeneity of cervical squamous cell carcinoma and adenocarcinoma
Source: Aging (Albany NY). 2024 Jan 10;16(1):568–92. doi: 10.18632/aging.205397 (PMC10817369; doi:10.18632/aging.205397)
Supplement: Supplementary Table 2 [file aging-16-205397-s003.xlsx]

## Sheet: Sheet1
	Supplementary Table 2. The prognostic data of 299 cervical cancer patients from the TCGA cohort
	bcr_patient_barcode	type	age_at_initial_pathologic_diagnosis	gender	race	ajcc_pathologic_tumor_stage	clinical_stage	histological_type	histological_grade	initial_pathologic_dx_year	menopause_status	birth_days_to	vital_status	tumor_status	last_contact_days_to	death_days_to	cause_of_death	new_tumor_event_type	new_tumor_event_site	new_tumor_event_site_other	new_tumor_event_dx_days_to	treatment_outcome_first_course	margin_status	residual_tumor	OS	OS.time	DSS	DSS.time	DFI	DFI.time	PFI	PFI.time
	TCGA-ZX-AA5X	CESC	64	FEMALE	WHITE	[Not Available]	Stage IIIB	Cervical Squamous Cell Carcinoma	G2	2013	Post (prior bilateral ovariectomy OR >12 mo since LMP with no prior hysterectomy)	-23440	Alive	WITH TUMOR	119	#N/A	#N/A	#N/A	#N/A	#N/A	#N/A	[Not Applicable]	#N/A	#N/A	0	119	0	119	#N/A	#N/A	0	119
	TCGA-ZJ-AB0I	CESC	25	FEMALE	WHITE	[Not Available]	Stage IIB	Cervical Squamous Cell Carcinoma	[Not Available]	2006	[Unknown]	-9486	Alive	#N/A	0	#N/A	#N/A	#N/A	#N/A	#N/A	#N/A	[Unknown]	#N/A	#N/A	0	0	0	0	#N/A	#N/A	0	0
	TCGA-ZJ-AB0H	CESC	48	FEMALE	[Unknown]	[Not Available]	Stage IIIB	Cervical Squamous Cell Carcinoma	[Not Available]	2006	[Unknown]	-17869	Alive	#N/A	0	#N/A	#N/A	#N/A	#N/A	#N/A	#N/A	[Unknown]	#N/A	#N/A	0	0	0	0	#N/A	#N/A	0	0
	TCGA-ZJ-AAXU	CESC	51	FEMALE	WHITE	[Not Available]	Stage IIB	Cervical Squamous Cell Carcinoma	G2	2010	[Unknown]	-18773	Alive	#N/A	5	#N/A	#N/A	#N/A	#N/A	#N/A	#N/A	[Unknown]	#N/A	#N/A	0	5	0	5	#N/A	#N/A	0	5
	TCGA-ZJ-AAXT	CESC	54	FEMALE	WHITE	[Not Available]	Stage IIIB	Cervical Squamous Cell Carcinoma	G2	2009	[Unknown]	-19847	Alive	#N/A	0	#N/A	#N/A	#N/A	#N/A	#N/A	#N/A	[Unknown]	#N/A	#N/A	0	0	0	0	#N/A	#N/A	0	0
	TCGA-ZJ-AAXN	CESC	34	FEMALE	WHITE	[Not Available]	Stage IB2	Cervical Squamous Cell Carcinoma	[Not Available]	2010	[Unknown]	-12701	Alive	#N/A	0	#N/A	#N/A	#N/A	#N/A	#N/A	#N/A	[Unknown]	#N/A	#N/A	0	0	0	0	#N/A	#N/A	0	0
	TCGA-ZJ-AAXJ	CESC	43	FEMALE	[Unknown]	[Not Available]	Stage IIB	Cervical Squamous Cell Carcinoma	[Not Available]	2010	[Unknown]	-16007	Alive	#N/A	0	#N/A	#N/A	#N/A	#N/A	#N/A	#N/A	[Unknown]	#N/A	#N/A	0	0	0	0	#N/A	#N/A	0	0
	TCGA-ZJ-AAXI	CESC	67	FEMALE	[Unknown]	[Not Available]	Stage IIB	Cervical Squamous Cell Carcinoma	G2	2010	[Unknown]	-24497	Alive	#N/A	0	#N/A	#N/A	#N/A	#N/A	#N/A	#N/A	[Unknown]	#N/A	#N/A	0	0	0	0	#N/A	#N/A	0	0
	TCGA-ZJ-AAXF	CESC	62	FEMALE	[Unknown]	[Not Available]	Stage IIB	Cervical Squamous Cell Carcinoma	G3	2010	[Unknown]	-22709	Alive	#N/A	0	#N/A	#N/A	#N/A	#N/A	#N/A	#N/A	[Unknown]	#N/A	#N/A	0	0	0	0	#N/A	#N/A	0	0
	TCGA-ZJ-AAXD	CESC	35	FEMALE	[Unknown]	[Not Available]	Stage IIIB	Cervical Squamous Cell Carcinoma	G2	2010	[Unknown]	-12968	Alive	#N/A	0	#N/A	#N/A	#N/A	#N/A	#N/A	#N/A	[Unknown]	#N/A	#N/A	0	0	0	0	#N/A	#N/A	0	0
	TCGA-ZJ-AAXB	CESC	42	FEMALE	WHITE	[Not Available]	Stage IB2	Endocervical Adenocarcinoma of the Usual Type	G3	2009	[Unknown]	-15492	Alive	#N/A	0	#N/A	#N/A	#N/A	#N/A	#N/A	#N/A	[Unknown]	#N/A	#N/A	0	0	0	0	#N/A	#N/A	0	0
	TCGA-ZJ-AAXA	CESC	64	FEMALE	WHITE	[Not Available]	Stage IB1	Cervical Squamous Cell Carcinoma	G2	2009	[Unknown]	-23603	Alive	#N/A	43	#N/A	#N/A	#N/A	#N/A	#N/A	#N/A	[Unknown]	#N/A	#N/A	0	43	0	43	#N/A	#N/A	0	43
	TCGA-ZJ-AAX8	CESC	58	FEMALE	[Unknown]	[Not Available]	Stage IIIB	Cervical Squamous Cell Carcinoma	G2	2009	[Unknown]	-21481	Alive	#N/A	0	#N/A	#N/A	#N/A	#N/A	#N/A	#N/A	[Unknown]	#N/A	#N/A	0	0	0	0	#N/A	#N/A	0	0
	TCGA-ZJ-AAX4	CESC	85	FEMALE	WHITE	[Not Available]	Stage II	Cervical Squamous Cell Carcinoma	G3	2008	[Unknown]	-31258	Alive	#N/A	21	#N/A	#N/A	#N/A	#N/A	#N/A	#N/A	[Unknown]	#N/A	#N/A	0	21	0	21	#N/A	#N/A	0	21
	TCGA-ZJ-A8QR	CESC	38	FEMALE	NATIVE HAWAIIAN OR OTHER PACIFIC ISLANDER	[Not Available]	Stage I	Cervical Squamous Cell Carcinoma	GX	2007	Pre (<6 months since LMP AND no prior bilateral ovariectomy AND not on estrogen replacement)	-14225	Dead	#N/A	#N/A	582	#N/A	#N/A	#N/A	#N/A	#N/A	[Unknown]	#N/A	#N/A	1	582	#N/A	582	#N/A	#N/A	0	582
	TCGA-ZJ-A8QQ	CESC	24	FEMALE	WHITE	[Not Available]	Stage IIB	Cervical Squamous Cell Carcinoma	GX	2007	Post (prior bilateral ovariectomy OR >12 mo since LMP with no prior hysterectomy)	-8918	Alive	TUMOR FREE	2056	#N/A	#N/A	#N/A	#N/A	#N/A	#N/A	Complete Remission/Response	#N/A	#N/A	0	2056	0	2056	0	2056	0	2056
	TCGA-ZJ-A8QO	CESC	73	FEMALE	[Unknown]	[Not Available]	[Not Available]	Cervical Squamous Cell Carcinoma	[Not Available]	2007	[Unknown]	-26723	Alive	#N/A	0	#N/A	#N/A	#N/A	#N/A	#N/A	#N/A	[Unknown]	#N/A	#N/A	0	0	0	0	#N/A	#N/A	0	0
	TCGA-XS-A8TJ	CESC	41	FEMALE	BLACK OR AFRICAN AMERICAN	[Not Available]	Stage IB1	Cervical Squamous Cell Carcinoma	G2	2012	Pre (<6 months since LMP AND no prior bilateral ovariectomy AND not on estrogen replacement)	-15298	Alive	TUMOR FREE	890	#N/A	#N/A	#N/A	#N/A	#N/A	#N/A	Complete Remission/Response	#N/A	#N/A	0	890	0	890	0	890	0	890
	TCGA-WL-A834	CESC	57	FEMALE	WHITE	[Not Available]	[Not Available]	Cervical Squamous Cell Carcinoma	G3	2012	Pre (<6 months since LMP AND no prior bilateral ovariectomy AND not on estrogen replacement)	#N/A	Alive	TUMOR FREE	791	#N/A	#N/A	#N/A	#N/A	#N/A	#N/A	Partial Remission/Response	#N/A	#N/A	0	791	0	791	#N/A	#N/A	0	791
	TCGA-VS-AA62	CESC	51	FEMALE	WHITE	[Not Available]	Stage IIB	Cervical Squamous Cell Carcinoma	G2	2009	Peri (6-12 months since last menstrual period)	-18792	Dead	WITH TUMOR	#N/A	469	Cervical Cancer	#N/A	#N/A	#N/A	#N/A	Progressive Disease	#N/A	#N/A	1	469	1	469	#N/A	#N/A	1	469
	TCGA-VS-A9V5	CESC	50	FEMALE	WHITE	[Not Available]	Stage IIB	Mucinous Adenocarcinoma of Endocervical Type	G2	2011	Pre (<6 months since LMP AND no prior bilateral ovariectomy AND not on estrogen replacement)	-18577	Dead	WITH TUMOR	#N/A	494	#N/A	#N/A	#N/A	#N/A	#N/A	Progressive Disease	#N/A	#N/A	1	494	1	494	#N/A	#N/A	1	494
	TCGA-VS-A9V4	CESC	63	FEMALE	WHITE	[Not Available]	Stage IVA	Mucinous Adenocarcinoma of Endocervical Type	G2	2013	Post (prior bilateral ovariectomy OR >12 mo since LMP with no prior hysterectomy)	-23334	Dead	WITH TUMOR	#N/A	132	Cervical Cancer	New Primary Tumor	#N/A	Sigmoid colon	100	[Unknown]	#N/A	#N/A	1	132	1	132	#N/A	#N/A	1	100
	TCGA-VS-A9V3	CESC	62	FEMALE	WHITE	[Not Available]	Stage IVB	Cervical Squamous Cell Carcinoma	G3	2013	[Not Evaluated]	-22990	Alive	WITH TUMOR	540	#N/A	#N/A	Distant Metastasis	Other, specify	Mediastinal lymph nodes	456	Complete Remission/Response	#N/A	#N/A	0	540	0	540	#N/A	#N/A	1	456
	TCGA-VS-A9V2	CESC	29	FEMALE	WHITE	[Not Available]	Stage IB1	Cervical Squamous Cell Carcinoma	G2	2013	Peri (6-12 months since last menstrual period)	-10637	Alive	TUMOR FREE	555	#N/A	#N/A	#N/A	#N/A	#N/A	#N/A	Complete Remission/Response	#N/A	#N/A	0	555	0	555	0	555	0	555
	TCGA-VS-A9V1	CESC	46	FEMALE	WHITE	[Not Available]	Stage IVB	Mucinous Adenocarcinoma of Endocervical Type	G2	2013	Pre (<6 months since LMP AND no prior bilateral ovariectomy AND not on estrogen replacement)	-17001	Dead	WITH TUMOR	#N/A	157	Cervical Cancer	Distant Metastasis	#N/A	Retroperitoneo	58	Progressive Disease	#N/A	#N/A	1	157	1	157	#N/A	#N/A	1	58
	TCGA-VS-A9V0	CESC	58	FEMALE	[Unknown]	[Not Available]	Stage IB	Mucinous Adenocarcinoma of Endocervical Type	G3	2013	Pre (<6 months since LMP AND no prior bilateral ovariectomy AND not on estrogen replacement)	-21215	Alive	WITH TUMOR	573	#N/A	#N/A	Distant Metastasis	Other, specify	Retroperitoneal lymph node and pelvic lymph node and lung	475	Complete Remission/Response	#N/A	#N/A	0	573	0	573	1	475	1	475
	TCGA-VS-A9UZ	CESC	61	FEMALE	WHITE	[Not Available]	Stage IB1	Mucinous Adenocarcinoma of Endocervical Type	G2	2009	Peri (6-12 months since last menstrual period)	-22344	Alive	TUMOR FREE	2044	#N/A	#N/A	#N/A	#N/A	#N/A	#N/A	Complete Remission/Response	#N/A	#N/A	0	2044	0	2044	0	2044	0	2044
	TCGA-VS-A9UY	CESC	29	FEMALE	[Unknown]	[Not Available]	Stage IVB	Cervical Squamous Cell Carcinoma	G2	2012	[Unknown]	-10707	Dead	WITH TUMOR	#N/A	555	Cervical Cancer	Distant Metastasis	Head & Neck	#N/A	412	Progressive Disease	#N/A	#N/A	1	555	1	555	#N/A	#N/A	1	412
	TCGA-VS-A9UV	CESC	74	FEMALE	[Unknown]	[Not Available]	Stage IVA	Cervical Squamous Cell Carcinoma	GX	2013	Post (prior bilateral ovariectomy OR >12 mo since LMP with no prior hysterectomy)	-27348	Dead	WITH TUMOR	#N/A	104	Cervical Cancer	#N/A	#N/A	#N/A	#N/A	[Unknown]	#N/A	#N/A	1	104	1	104	#N/A	#N/A	1	104
	TCGA-VS-A9UU	CESC	42	FEMALE	[Unknown]	[Not Available]	Stage IIB	Cervical Squamous Cell Carcinoma	G1	2013	Pre (<6 months since LMP AND no prior bilateral ovariectomy AND not on estrogen replacement)	-15534	Alive	TUMOR FREE	442	#N/A	#N/A	#N/A	#N/A	#N/A	#N/A	Complete Remission/Response	#N/A	#N/A	0	442	0	442	0	442	0	442
	TCGA-VS-A9UT	CESC	72	FEMALE	ASIAN	[Not Available]	Stage IB	Mucinous Adenocarcinoma of Endocervical Type	G3	2013	Post (prior bilateral ovariectomy OR >12 mo since LMP with no prior hysterectomy)	-26603	Alive	TUMOR FREE	482	#N/A	#N/A	#N/A	#N/A	#N/A	#N/A	Complete Remission/Response	#N/A	#N/A	0	482	0	482	0	482	0	482
	TCGA-VS-A9UR	CESC	53	FEMALE	WHITE	[Not Available]	Stage IIA	Mucinous Adenocarcinoma of Endocervical Type	GX	2013	[Unknown]	-19688	Alive	WITH TUMOR	793	#N/A	#N/A	Distant Metastasis	Other, specify	Retroperitoneal	675	Complete Remission/Response	#N/A	#N/A	0	793	0	793	1	675	1	675
	TCGA-VS-A9UQ	CESC	32	FEMALE	[Unknown]	[Not Available]	Stage IB	Mucinous Adenocarcinoma of Endocervical Type	G2	2011	Peri (6-12 months since last menstrual period)	-11853	Alive	TUMOR FREE	1263	#N/A	#N/A	Distant Metastasis	Other, specify	Ovary	561	Complete Remission/Response	#N/A	#N/A	0	1263	0	1263	1	561	1	561
	TCGA-VS-A9UP	CESC	43	FEMALE	[Unknown]	[Not Available]	Stage IIA	Mucinous Adenocarcinoma of Endocervical Type	G3	2011	Peri (6-12 months since last menstrual period)	-15849	Alive	WITH TUMOR	1444	#N/A	#N/A	Distant Metastasis	Other, specify	Paraortic lymph nodes	352	Complete Remission/Response	#N/A	#N/A	0	1444	0	1444	1	352	1	352
	TCGA-VS-A9UO	CESC	43	FEMALE	WHITE	[Not Available]	Stage IIB	Mucinous Adenocarcinoma of Endocervical Type	G2	2011	Peri (6-12 months since last menstrual period)	-15813	Alive	TUMOR FREE	1456	#N/A	#N/A	#N/A	#N/A	#N/A	#N/A	Complete Remission/Response	#N/A	#N/A	0	1456	0	1456	0	1456	0	1456
	TCGA-VS-A9UM	CESC	39	FEMALE	BLACK OR AFRICAN AMERICAN	[Not Available]	Stage IVB	Cervical Squamous Cell Carcinoma	G2	2011	Peri (6-12 months since last menstrual period)	-14255	Dead	TUMOR FREE	#N/A	829	#N/A	#N/A	#N/A	#N/A	#N/A	Complete Remission/Response	#N/A	#N/A	1	829	0	829	#N/A	#N/A	0	829
	TCGA-VS-A9UL	CESC	79	FEMALE	WHITE	[Not Available]	Stage IIIB	Cervical Squamous Cell Carcinoma	G3	2010	Post (prior bilateral ovariectomy OR >12 mo since LMP with no prior hysterectomy)	-29033	Dead	WITH TUMOR	#N/A	442	Cervical Cancer	Distant Metastasis	#N/A	Bone	336	Progressive Disease	#N/A	#N/A	1	442	1	442	#N/A	#N/A	1	336
	TCGA-VS-A9UJ	CESC	55	FEMALE	[Unknown]	[Not Available]	Stage IIB	Cervical Squamous Cell Carcinoma	GX	2012	Pre (<6 months since LMP AND no prior bilateral ovariectomy AND not on estrogen replacement)	-20264	Dead	WITH TUMOR	#N/A	52	Cervical Cancer	#N/A	#N/A	#N/A	#N/A	[Not Available]	#N/A	#N/A	1	52	1	52	#N/A	#N/A	1	52
	TCGA-VS-A9UI	CESC	76	FEMALE	WHITE	[Not Available]	Stage IIB	Cervical Squamous Cell Carcinoma	GX	2011	Post (prior bilateral ovariectomy OR >12 mo since LMP with no prior hysterectomy)	-27838	Dead	TUMOR FREE	#N/A	1372	#N/A	#N/A	#N/A	#N/A	#N/A	Complete Remission/Response	#N/A	#N/A	1	1372	0	1372	0	1372	0	1372
	TCGA-VS-A9UH	CESC	53	FEMALE	BLACK OR AFRICAN AMERICAN	[Not Available]	Stage IVA	Cervical Squamous Cell Carcinoma	GX	2010	[Not Available]	-19454	Alive	TUMOR FREE	1427	#N/A	#N/A	#N/A	#N/A	#N/A	#N/A	Complete Remission/Response	#N/A	#N/A	0	1427	0	1427	#N/A	#N/A	0	1427
	TCGA-VS-A9UD	CESC	73	FEMALE	WHITE	[Not Available]	Stage IIIA	Cervical Squamous Cell Carcinoma	G2	2013	Post (prior bilateral ovariectomy OR >12 mo since LMP with no prior hysterectomy)	-26815	Alive	TUMOR FREE	739	#N/A	#N/A	#N/A	#N/A	#N/A	#N/A	Complete Remission/Response	#N/A	#N/A	0	739	0	739	0	739	0	739
	TCGA-VS-A9UC	CESC	32	FEMALE	[Unknown]	[Not Available]	Stage IIB	Cervical Squamous Cell Carcinoma	G2	2012	Peri (6-12 months since last menstrual period)	-11790	Alive	WITH TUMOR	825	#N/A	#N/A	#N/A	#N/A	#N/A	#N/A	Stable Disease	#N/A	#N/A	0	825	0	825	#N/A	#N/A	0	825
	TCGA-VS-A9UB	CESC	54	FEMALE	[Unknown]	[Not Available]	Stage IIB	Cervical Squamous Cell Carcinoma	G3	2012	Post (prior bilateral ovariectomy OR >12 mo since LMP with no prior hysterectomy)	-19737	Alive	TUMOR FREE	911	#N/A	#N/A	#N/A	#N/A	#N/A	#N/A	Complete Remission/Response	#N/A	#N/A	0	911	0	911	0	911	0	911
	TCGA-VS-A9U7	CESC	30	FEMALE	WHITE	[Not Available]	Stage IB1	Cervical Squamous Cell Carcinoma	G3	2011	Pre (<6 months since LMP AND no prior bilateral ovariectomy AND not on estrogen replacement)	-11210	Alive	TUMOR FREE	1472	#N/A	#N/A	#N/A	#N/A	#N/A	#N/A	Complete Remission/Response	#N/A	#N/A	0	1472	0	1472	0	1472	0	1472
	TCGA-VS-A9U6	CESC	52	FEMALE	WHITE	[Not Available]	Stage IVB	Cervical Squamous Cell Carcinoma	GX	2011	Pre (<6 months since LMP AND no prior bilateral ovariectomy AND not on estrogen replacement)	-19109	Alive	WITH TUMOR	1320	#N/A	#N/A	Distant Metastasis	#N/A	Diaphragm	711	Stable Disease	#N/A	#N/A	0	1320	0	1320	#N/A	#N/A	1	711
	TCGA-VS-A9U5	CESC	57	FEMALE	WHITE	[Not Available]	Stage IIB	Cervical Squamous Cell Carcinoma	G3	2010	Peri (6-12 months since last menstrual period)	-21149	Alive	TUMOR FREE	1535	#N/A	#N/A	#N/A	#N/A	#N/A	#N/A	Complete Remission/Response	#N/A	#N/A	0	1535	0	1535	0	1535	0	1535
	TCGA-VS-A959	CESC	76	FEMALE	[Unknown]	[Not Available]	Stage IIB	Cervical Squamous Cell Carcinoma	G3	2010	Post (prior bilateral ovariectomy OR >12 mo since LMP with no prior hysterectomy)	-27897	Alive	TUMOR FREE	1561	#N/A	#N/A	#N/A	#N/A	#N/A	#N/A	Complete Remission/Response	#N/A	#N/A	0	1561	0	1561	0	1561	0	1561
	TCGA-VS-A958	CESC	46	FEMALE	WHITE	[Not Available]	Stage IIB	Cervical Squamous Cell Carcinoma	G2	2010	Pre (<6 months since LMP AND no prior bilateral ovariectomy AND not on estrogen replacement)	-16905	Alive	TUMOR FREE	1525	#N/A	#N/A	#N/A	#N/A	#N/A	#N/A	Complete Remission/Response	#N/A	#N/A	0	1525	0	1525	0	1525	0	1525
	TCGA-VS-A957	CESC	64	FEMALE	WHITE	[Not Available]	Stage IB1	Cervical Squamous Cell Carcinoma	G3	2010	Post (prior bilateral ovariectomy OR >12 mo since LMP with no prior hysterectomy)	-23585	Alive	TUMOR FREE	1688	#N/A	#N/A	#N/A	#N/A	#N/A	#N/A	Complete Remission/Response	#N/A	#N/A	0	1688	0	1688	0	1688	0	1688
	TCGA-VS-A954	CESC	67	FEMALE	[Unknown]	[Not Available]	Stage IIIB	Cervical Squamous Cell Carcinoma	G2	2010	Post (prior bilateral ovariectomy OR >12 mo since LMP with no prior hysterectomy)	-24498	Alive	TUMOR FREE	1714	#N/A	#N/A	#N/A	#N/A	#N/A	#N/A	Complete Remission/Response	#N/A	#N/A	0	1714	0	1714	0	1714	0	1714
	TCGA-VS-A953	CESC	63	FEMALE	[Unknown]	[Not Available]	Stage IVA	Cervical Squamous Cell Carcinoma	GX	2010	Post (prior bilateral ovariectomy OR >12 mo since LMP with no prior hysterectomy)	-23277	Dead	WITH TUMOR	#N/A	477	Cervical Cancer	#N/A	#N/A	#N/A	#N/A	Partial Remission/Response	#N/A	#N/A	1	477	1	477	#N/A	#N/A	1	477
	TCGA-VS-A952	CESC	66	FEMALE	WHITE	[Not Available]	Stage IB1	Mucinous Adenocarcinoma of Endocervical Type	G2	2010	Post (prior bilateral ovariectomy OR >12 mo since LMP with no prior hysterectomy)	-24345	Alive	TUMOR FREE	1778	#N/A	#N/A	#N/A	#N/A	#N/A	#N/A	Complete Remission/Response	#N/A	#N/A	0	1778	0	1778	0	1778	0	1778
	TCGA-VS-A950	CESC	42	FEMALE	[Unknown]	[Not Available]	Stage IIIA	Cervical Squamous Cell Carcinoma	G3	2011	Pre (<6 months since LMP AND no prior bilateral ovariectomy AND not on estrogen replacement)	-15365	Alive	WITH TUMOR	1221	#N/A	#N/A	#N/A	#N/A	#N/A	#N/A	Partial Remission/Response	#N/A	#N/A	0	1221	0	1221	#N/A	#N/A	0	1221
	TCGA-VS-A94Z	CESC	38	FEMALE	WHITE	[Not Available]	Stage IIB	Cervical Squamous Cell Carcinoma	G2	2012	Pre (<6 months since LMP AND no prior bilateral ovariectomy AND not on estrogen replacement)	-14046	Alive	TUMOR FREE	1015	#N/A	#N/A	#N/A	#N/A	#N/A	#N/A	Complete Remission/Response	#N/A	#N/A	0	1015	0	1015	0	1015	0	1015
	TCGA-VS-A94Y	CESC	47	FEMALE	WHITE	[Not Available]	Stage IIB	Cervical Squamous Cell Carcinoma	GX	2010	Pre (<6 months since LMP AND no prior bilateral ovariectomy AND not on estrogen replacement)	-17465	Dead	WITH TUMOR	#N/A	144	Cervical Cancer	#N/A	#N/A	#N/A	#N/A	Progressive Disease	#N/A	#N/A	1	144	1	144	#N/A	#N/A	1	144
	TCGA-VS-A94X	CESC	40	FEMALE	BLACK OR AFRICAN AMERICAN	[Not Available]	Stage IIB	Cervical Squamous Cell Carcinoma	G2	2010	[Not Evaluated]	-14955	Dead	WITH TUMOR	#N/A	506	Cervical Cancer	#N/A	#N/A	#N/A	#N/A	Partial Remission/Response	#N/A	#N/A	1	506	1	506	#N/A	#N/A	1	506
	TCGA-VS-A94W	CESC	39	FEMALE	WHITE	[Not Available]	Stage IIB	Cervical Squamous Cell Carcinoma	G2	2011	Pre (<6 months since LMP AND no prior bilateral ovariectomy AND not on estrogen replacement)	-14399	Alive	TUMOR FREE	1243	#N/A	#N/A	#N/A	#N/A	#N/A	#N/A	Complete Remission/Response	#N/A	#N/A	0	1243	0	1243	0	1243	0	1243
	TCGA-VS-A8QM	CESC	47	FEMALE	[Unknown]	[Not Available]	Stage IVB	Cervical Squamous Cell Carcinoma	GX	2009	[Not Available]	-17168	Dead	WITH TUMOR	#N/A	951	Cervical Cancer	#N/A	#N/A	#N/A	#N/A	Progressive Disease	#N/A	#N/A	1	951	1	951	#N/A	#N/A	1	951
	TCGA-VS-A8QH	CESC	76	FEMALE	WHITE	[Not Available]	Stage IB1	Mucinous Adenocarcinoma of Endocervical Type	G2	2010	Post (prior bilateral ovariectomy OR >12 mo since LMP with no prior hysterectomy)	-27909	Dead	WITH TUMOR	#N/A	1210	Cervical Cancer	#N/A	#N/A	#N/A	#N/A	Partial Remission/Response	#N/A	#N/A	1	1210	1	1210	#N/A	#N/A	1	1210
	TCGA-VS-A8QF	CESC	42	FEMALE	WHITE	[Not Available]	Stage IIB	Cervical Squamous Cell Carcinoma	G2	2010	Pre (<6 months since LMP AND no prior bilateral ovariectomy AND not on estrogen replacement)	-15374	Alive	TUMOR FREE	1800	#N/A	#N/A	#N/A	#N/A	#N/A	#N/A	Complete Remission/Response	#N/A	#N/A	0	1800	0	1800	0	1800	0	1800
	TCGA-VS-A8QC	CESC	51	FEMALE	WHITE	[Not Available]	Stage IVA	Cervical Squamous Cell Carcinoma	G2	2009	Peri (6-12 months since last menstrual period)	-18743	Dead	WITH TUMOR	#N/A	350	Cervical Cancer	Distant Metastasis	#N/A	Liver	263	Progressive Disease	#N/A	#N/A	1	350	1	350	#N/A	#N/A	1	263
	TCGA-VS-A8QA	CESC	44	FEMALE	[Unknown]	[Not Available]	Stage IB1	Cervical Squamous Cell Carcinoma	GX	2011	Peri (6-12 months since last menstrual period)	-16072	Alive	TUMOR FREE	1099	#N/A	#N/A	#N/A	#N/A	#N/A	#N/A	Complete Remission/Response	#N/A	#N/A	0	1099	0	1099	0	1099	0	1099
	TCGA-VS-A8Q9	CESC	79	FEMALE	WHITE	[Not Available]	Stage IB1	Cervical Squamous Cell Carcinoma	G2	2010	Post (prior bilateral ovariectomy OR >12 mo since LMP with no prior hysterectomy)	-28881	Alive	TUMOR FREE	1630	#N/A	#N/A	#N/A	#N/A	#N/A	#N/A	Complete Remission/Response	#N/A	#N/A	0	1630	0	1630	0	1630	0	1630
	TCGA-VS-A8Q8	CESC	26	FEMALE	WHITE	[Not Available]	Stage IB	Cervical Squamous Cell Carcinoma	G2	2010	Pre (<6 months since LMP AND no prior bilateral ovariectomy AND not on estrogen replacement)	-9571	Dead	WITH TUMOR	#N/A	978	Cervical Cancer	Locoregional Recurrence	#N/A	Pelvis	488	Progressive Disease	#N/A	#N/A	1	978	1	978	#N/A	#N/A	1	488
	TCGA-VS-A8EL	CESC	38	FEMALE	BLACK OR AFRICAN AMERICAN	[Not Available]	Stage IIB	Cervical Squamous Cell Carcinoma	G3	2009	Pre (<6 months since LMP AND no prior bilateral ovariectomy AND not on estrogen replacement)	-14162	Alive	TUMOR FREE	1992	#N/A	#N/A	#N/A	#N/A	#N/A	#N/A	Complete Remission/Response	#N/A	#N/A	0	1992	0	1992	0	1992	0	1992
	TCGA-VS-A8EK	CESC	65	FEMALE	WHITE	[Not Available]	Stage IVA	Cervical Squamous Cell Carcinoma	G2	2008	[Not Evaluated]	-23817	Dead	WITH TUMOR	#N/A	829	Cervical Cancer	#N/A	#N/A	#N/A	#N/A	Partial Remission/Response	#N/A	#N/A	1	829	1	829	#N/A	#N/A	1	829
	TCGA-VS-A8EJ	CESC	60	FEMALE	WHITE	[Not Available]	Stage IIB	Cervical Squamous Cell Carcinoma	G3	2008	Post (prior bilateral ovariectomy OR >12 mo since LMP with no prior hysterectomy)	-22000	Dead	WITH TUMOR	#N/A	607	Cervical Cancer	#N/A	#N/A	#N/A	#N/A	Progressive Disease	#N/A	#N/A	1	607	1	607	#N/A	#N/A	1	607
	TCGA-VS-A8EI	CESC	38	FEMALE	WHITE	[Not Available]	Stage IIB	Cervical Squamous Cell Carcinoma	GX	2012	Pre (<6 months since LMP AND no prior bilateral ovariectomy AND not on estrogen replacement)	-14129	Alive	TUMOR FREE	729	#N/A	#N/A	#N/A	#N/A	#N/A	#N/A	Complete Remission/Response	#N/A	#N/A	0	729	0	729	0	729	0	729
	TCGA-VS-A8EH	CESC	56	FEMALE	[Unknown]	[Not Available]	Stage IIIB	Cervical Squamous Cell Carcinoma	G2	2012	Peri (6-12 months since last menstrual period)	-20728	Alive	TUMOR FREE	986	#N/A	#N/A	#N/A	#N/A	#N/A	#N/A	Complete Remission/Response	#N/A	#N/A	0	986	0	986	0	986	0	986
	TCGA-VS-A8EG	CESC	36	FEMALE	[Unknown]	[Not Available]	Stage IB1	Cervical Squamous Cell Carcinoma	GX	2011	Peri (6-12 months since last menstrual period)	-13166	Alive	TUMOR FREE	1386	#N/A	#N/A	#N/A	#N/A	#N/A	#N/A	Complete Remission/Response	#N/A	#N/A	0	1386	0	1386	0	1386	0	1386
	TCGA-VS-A8EC	CESC	55	FEMALE	WHITE	[Not Available]	Stage IIIB	Cervical Squamous Cell Carcinoma	G2	2011	Peri (6-12 months since last menstrual period)	-20286	Alive	TUMOR FREE	1415	#N/A	#N/A	#N/A	#N/A	#N/A	#N/A	Complete Remission/Response	#N/A	#N/A	0	1415	0	1415	0	1415	0	1415
	TCGA-VS-A8EB	CESC	41	FEMALE	WHITE	[Not Available]	Stage IIIB	Cervical Squamous Cell Carcinoma	GX	2010	Pre (<6 months since LMP AND no prior bilateral ovariectomy AND not on estrogen replacement)	-15215	Dead	WITH TUMOR	#N/A	305	Cervical Cancer	#N/A	#N/A	#N/A	#N/A	Progressive Disease	#N/A	#N/A	1	305	1	305	#N/A	#N/A	1	305
	TCGA-UC-A7PI	CESC	44	FEMALE	WHITE	[Not Available]	Stage IB1	Endometrioid Adenocarcinoma of Endocervix	G1	2009	Pre (<6 months since LMP AND no prior bilateral ovariectomy AND not on estrogen replacement)	-16427	Alive	TUMOR FREE	2114	#N/A	#N/A	Locoregional Recurrence	Other, specify	#N/A	778	Complete Remission/Response	#N/A	#N/A	0	2114	0	2114	1	778	1	778
	TCGA-UC-A7PG	CESC	44	FEMALE	WHITE	[Not Available]	Stage IIIB	Cervical Squamous Cell Carcinoma	G1	2003	Pre (<6 months since LMP AND no prior bilateral ovariectomy AND not on estrogen replacement)	-16231	Dead	WITH TUMOR	#N/A	370	Cervical Cancer	#N/A	#N/A	#N/A	#N/A	Progressive Disease	#N/A	#N/A	1	370	1	370	#N/A	#N/A	1	370
	TCGA-UC-A7PF	CESC	44	FEMALE	[Not Evaluated]	[Not Available]	Stage IB1	Cervical Squamous Cell Carcinoma	G2	1999	Pre (<6 months since LMP AND no prior bilateral ovariectomy AND not on estrogen replacement)	-16412	Dead	#N/A	#N/A	2859	#N/A	#N/A	#N/A	#N/A	#N/A	[Not Available]	#N/A	#N/A	1	2859	#N/A	2859	#N/A	#N/A	0	2859
	TCGA-UC-A7PD	CESC	21	FEMALE	AMERICAN INDIAN OR ALASKA NATIVE	[Not Available]	Stage IB	Cervical Squamous Cell Carcinoma	G2	1997	Pre (<6 months since LMP AND no prior bilateral ovariectomy AND not on estrogen replacement)	-7855	Dead	WITH TUMOR	#N/A	355	Cervical Cancer	Locoregional Recurrence	#N/A	vaginal cuff	202	Complete Remission/Response	#N/A	#N/A	1	355	1	355	1	202	1	202
	TCGA-RA-A741	CESC	34	FEMALE	WHITE	[Not Available]	Stage IIB	Cervical Squamous Cell Carcinoma	GX	2013	Pre (<6 months since LMP AND no prior bilateral ovariectomy AND not on estrogen replacement)	-12607	Alive	TUMOR FREE	444	#N/A	#N/A	#N/A	#N/A	#N/A	#N/A	Complete Remission/Response	#N/A	#N/A	0	444	0	444	0	444	0	444
	TCGA-R2-A69V	CESC	42	FEMALE	WHITE	[Not Available]	Stage IB	Cervical Squamous Cell Carcinoma	G3	2011	Peri (6-12 months since last menstrual period)	-15479	Alive	TUMOR FREE	596	#N/A	#N/A	#N/A	#N/A	#N/A	#N/A	Complete Remission/Response	#N/A	#N/A	0	596	0	596	0	596	0	596
	TCGA-Q1-A73R	CESC	45	FEMALE	WHITE	[Not Available]	Stage I	Endocervical Type of Adenocarcinoma	GX	2013	Pre (<6 months since LMP AND no prior bilateral ovariectomy AND not on estrogen replacement)	-16701	Alive	TUMOR FREE	567	#N/A	#N/A	#N/A	#N/A	#N/A	#N/A	Complete Remission/Response	#N/A	#N/A	0	567	0	567	0	567	0	567
	TCGA-Q1-A73Q	CESC	46	FEMALE	WHITE	[Not Available]	Stage I	Cervical Squamous Cell Carcinoma	GX	2013	Pre (<6 months since LMP AND no prior bilateral ovariectomy AND not on estrogen replacement)	-16851	Alive	WITH TUMOR	284	#N/A	#N/A	#N/A	#N/A	#N/A	#N/A	[Unknown]	#N/A	#N/A	0	284	0	284	#N/A	#N/A	0	284
	TCGA-Q1-A73P	CESC	45	FEMALE	WHITE	[Not Available]	Stage IB1	Endocervical Type of Adenocarcinoma	G1	2013	Pre (<6 months since LMP AND no prior bilateral ovariectomy AND not on estrogen replacement)	-16450	Alive	TUMOR FREE	483	#N/A	#N/A	#N/A	#N/A	#N/A	#N/A	Complete Remission/Response	#N/A	#N/A	0	483	0	483	0	483	0	483
	TCGA-Q1-A73O	CESC	37	FEMALE	[Not Evaluated]	[Not Available]	Stage IB2	Cervical Squamous Cell Carcinoma	GX	2013	Pre (<6 months since LMP AND no prior bilateral ovariectomy AND not on estrogen replacement)	-13601	Alive	TUMOR FREE	428	#N/A	#N/A	#N/A	#N/A	#N/A	#N/A	Complete Remission/Response	#N/A	#N/A	0	428	0	428	0	428	0	428
	TCGA-Q1-A6DW	CESC	44	FEMALE	WHITE	[Not Available]	Stage I	Cervical Squamous Cell Carcinoma	GX	2013	Pre (<6 months since LMP AND no prior bilateral ovariectomy AND not on estrogen replacement)	-16200	Alive	#N/A	534	#N/A	#N/A	#N/A	#N/A	#N/A	#N/A	[Unknown]	#N/A	#N/A	0	534	0	534	#N/A	#N/A	0	534
	TCGA-Q1-A6DV	CESC	36	FEMALE	ASIAN	[Not Available]	Stage IB1	Mucinous Adenocarcinoma of Endocervical Type	G2	2013	Pre (<6 months since LMP AND no prior bilateral ovariectomy AND not on estrogen replacement)	-13166	Alive	TUMOR FREE	491	#N/A	#N/A	#N/A	#N/A	#N/A	#N/A	Complete Remission/Response	#N/A	#N/A	0	491	0	491	0	491	0	491
	TCGA-Q1-A6DT	CESC	55	FEMALE	WHITE	[Not Available]	Stage I	Cervical Squamous Cell Carcinoma	GX	2013	Post (prior bilateral ovariectomy OR >12 mo since LMP with no prior hysterectomy)	-20286	Dead	WITH TUMOR	#N/A	275	Cervical Cancer	#N/A	#N/A	#N/A	#N/A	[Not Available]	#N/A	#N/A	1	275	1	275	#N/A	#N/A	1	275
	TCGA-Q1-A5R3	CESC	56	FEMALE	WHITE	[Not Available]	[Not Available]	Cervical Squamous Cell Carcinoma	G2	2012	Post (prior bilateral ovariectomy OR >12 mo since LMP with no prior hysterectomy)	-20574	Alive	TUMOR FREE	485	#N/A	#N/A	#N/A	#N/A	#N/A	#N/A	Complete Remission/Response	#N/A	#N/A	0	485	0	485	0	485	0	485
	TCGA-Q1-A5R2	CESC	64	FEMALE	WHITE	[Not Available]	[Not Available]	Cervical Squamous Cell Carcinoma	G3	2012	Post (prior bilateral ovariectomy OR >12 mo since LMP with no prior hysterectomy)	-23523	Alive	TUMOR FREE	499	#N/A	#N/A	#N/A	#N/A	#N/A	#N/A	[Not Applicable]	#N/A	#N/A	0	499	0	499	#N/A	#N/A	0	499
	TCGA-Q1-A5R1	CESC	32	FEMALE	WHITE	[Not Available]	Stage IB1	Mucinous Adenocarcinoma of Endocervical Type	G2	2012	Pre (<6 months since LMP AND no prior bilateral ovariectomy AND not on estrogen replacement)	-11705	Alive	TUMOR FREE	474	#N/A	#N/A	#N/A	#N/A	#N/A	#N/A	Complete Remission/Response	#N/A	#N/A	0	474	0	474	0	474	0	474
	TCGA-PN-A8MA	CESC	43	FEMALE	BLACK OR AFRICAN AMERICAN	[Not Available]	Stage IIB	Cervical Squamous Cell Carcinoma	G3	2013	Pre (<6 months since LMP AND no prior bilateral ovariectomy AND not on estrogen replacement)	-15918	Alive	WITH TUMOR	90	#N/A	#N/A	#N/A	#N/A	#N/A	#N/A	Stable Disease	#N/A	#N/A	0	90	0	90	#N/A	#N/A	0	90
	TCGA-MY-A913	CESC	28	FEMALE	BLACK OR AFRICAN AMERICAN	[Not Available]	Stage IIA	Cervical Squamous Cell Carcinoma	G3	2013	Pre (<6 months since LMP AND no prior bilateral ovariectomy AND not on estrogen replacement)	-10379	Alive	TUMOR FREE	524	#N/A	#N/A	#N/A	#N/A	#N/A	#N/A	Complete Remission/Response	#N/A	#N/A	0	524	0	524	0	524	0	524
	TCGA-MY-A5BF	CESC	68	FEMALE	WHITE	[Not Available]	Stage IIA2	Cervical Squamous Cell Carcinoma	G1	2012	Post (prior bilateral ovariectomy OR >12 mo since LMP with no prior hysterectomy)	-25082	Alive	TUMOR FREE	634	#N/A	#N/A	#N/A	#N/A	#N/A	#N/A	Stable Disease	#N/A	#N/A	0	634	0	634	#N/A	#N/A	0	634
	TCGA-MY-A5BE	CESC	42	FEMALE	BLACK OR AFRICAN AMERICAN	[Not Available]	Stage IB1	Cervical Squamous Cell Carcinoma	G3	2011	Post (prior bilateral ovariectomy OR >12 mo since LMP with no prior hysterectomy)	-15466	Alive	TUMOR FREE	1066	#N/A	#N/A	#N/A	#N/A	#N/A	#N/A	Complete Remission/Response	#N/A	#N/A	0	1066	0	1066	0	1066	0	1066
	TCGA-MY-A5BD	CESC	62	FEMALE	WHITE	[Not Available]	Stage IIB	Cervical Squamous Cell Carcinoma	G1	2010	Post (prior bilateral ovariectomy OR >12 mo since LMP with no prior hysterectomy)	-22901	Alive	TUMOR FREE	1667	#N/A	#N/A	#N/A	#N/A	#N/A	#N/A	Stable Disease	#N/A	#N/A	0	1667	0	1667	#N/A	#N/A	0	1667
	TCGA-MU-A8JM	CESC	46	FEMALE	WHITE	[Not Available]	Stage IB1	Cervical Squamous Cell Carcinoma	G2	2013	[Unknown]	-17156	Alive	TUMOR FREE	607	#N/A	#N/A	#N/A	#N/A	#N/A	#N/A	Complete Remission/Response	#N/A	#N/A	0	607	0	607	0	607	0	607
	TCGA-MU-A5YI	CESC	60	FEMALE	BLACK OR AFRICAN AMERICAN	[Not Available]	Stage IA1	Cervical Squamous Cell Carcinoma	G2	2011	Post (prior bilateral ovariectomy OR >12 mo since LMP with no prior hysterectomy)	-21927	Alive	WITH TUMOR	1053	#N/A	#N/A	Distant Metastasis	Other, specify	Thoracic Spine	630	[Not Available]	#N/A	#N/A	0	1053	0	1053	#N/A	#N/A	1	630
	TCGA-MU-A51Y	CESC	27	FEMALE	WHITE	[Not Available]	Stage IIA1	Cervical Squamous Cell Carcinoma	G2	2012	Pre (<6 months since LMP AND no prior bilateral ovariectomy AND not on estrogen replacement)	-10199	Alive	TUMOR FREE	854	#N/A	#N/A	#N/A	#N/A	#N/A	#N/A	Complete Remission/Response	#N/A	#N/A	0	854	0	854	0	854	0	854
	TCGA-MA-AA43	CESC	48	FEMALE	WHITE	[Not Available]	Stage IIIB	Cervical Squamous Cell Carcinoma	G3	2013	Peri (6-12 months since last menstrual period)	-17658	Alive	TUMOR FREE	346	#N/A	#N/A	#N/A	#N/A	#N/A	#N/A	Complete Remission/Response	#N/A	#N/A	0	346	0	346	0	346	0	346
	TCGA-MA-AA42	CESC	75	FEMALE	WHITE	[Not Available]	Stage IIB	Cervical Squamous Cell Carcinoma	G3	2013	Post (prior bilateral ovariectomy OR >12 mo since LMP with no prior hysterectomy)	-27460	Alive	TUMOR FREE	259	#N/A	#N/A	#N/A	#N/A	#N/A	#N/A	Complete Remission/Response	#N/A	#N/A	0	259	0	259	0	259	0	259
	TCGA-MA-AA41	CESC	33	FEMALE	WHITE	[Not Available]	Stage IIB	Cervical Squamous Cell Carcinoma	G2	2013	Pre (<6 months since LMP AND no prior bilateral ovariectomy AND not on estrogen replacement)	-12398	Alive	WITH TUMOR	279	#N/A	#N/A	#N/A	#N/A	#N/A	#N/A	Progressive Disease	#N/A	#N/A	0	279	0	279	#N/A	#N/A	0	279
	TCGA-MA-AA3Z	CESC	43	FEMALE	WHITE	[Not Available]	Stage IB2	Cervical Squamous Cell Carcinoma	GX	2013	Pre (<6 months since LMP AND no prior bilateral ovariectomy AND not on estrogen replacement)	-15762	Alive	TUMOR FREE	595	#N/A	#N/A	#N/A	#N/A	#N/A	#N/A	Complete Remission/Response	#N/A	#N/A	0	595	0	595	0	595	0	595
	TCGA-MA-AA3Y	CESC	48	FEMALE	WHITE	[Not Available]	Stage IB1	Cervical Squamous Cell Carcinoma	G3	2012	Pre (<6 months since LMP AND no prior bilateral ovariectomy AND not on estrogen replacement)	-17795	Alive	TUMOR FREE	542	#N/A	#N/A	#N/A	#N/A	#N/A	#N/A	Complete Remission/Response	#N/A	#N/A	0	542	0	542	0	542	0	542
	TCGA-MA-AA3X	CESC	50	FEMALE	BLACK OR AFRICAN AMERICAN	[Not Available]	Stage IIIB	Cervical Squamous Cell Carcinoma	G2	2012	Post (prior bilateral ovariectomy OR >12 mo since LMP with no prior hysterectomy)	-18412	Alive	TUMOR FREE	617	#N/A	#N/A	#N/A	#N/A	#N/A	#N/A	Complete Remission/Response	#N/A	#N/A	0	617	0	617	0	617	0	617
	TCGA-MA-AA3W	CESC	54	FEMALE	WHITE	[Not Available]	Stage IB1	Cervical Squamous Cell Carcinoma	G3	2012	Post (prior bilateral ovariectomy OR >12 mo since LMP with no prior hysterectomy)	-20066	Alive	TUMOR FREE	685	#N/A	#N/A	#N/A	#N/A	#N/A	#N/A	Complete Remission/Response	#N/A	#N/A	0	685	0	685	0	685	0	685
	TCGA-LP-A7HU	CESC	53	FEMALE	ASIAN	[Not Available]	Stage II	Endocervical Type of Adenocarcinoma	G3	2013	Post (prior bilateral ovariectomy OR >12 mo since LMP with no prior hysterectomy)	-19595	Alive	TUMOR FREE	406	#N/A	#N/A	#N/A	#N/A	#N/A	#N/A	Complete Remission/Response	#N/A	#N/A	0	406	0	406	0	406	0	406
	TCGA-LP-A5U3	CESC	40	FEMALE	ASIAN	[Not Available]	Stage IB1	Cervical Squamous Cell Carcinoma	G3	2012	Pre (<6 months since LMP AND no prior bilateral ovariectomy AND not on estrogen replacement)	-14698	Alive	TUMOR FREE	25	#N/A	#N/A	#N/A	#N/A	#N/A	#N/A	Complete Remission/Response	#N/A	#N/A	0	25	0	25	0	25	0	25
	TCGA-LP-A5U2	CESC	30	FEMALE	ASIAN	[Not Available]	Stage IIIB	Endocervical Adenocarcinoma of the Usual Type	G3	2012	Pre (<6 months since LMP AND no prior bilateral ovariectomy AND not on estrogen replacement)	-11049	Alive	TUMOR FREE	9	#N/A	#N/A	#N/A	#N/A	#N/A	#N/A	Complete Remission/Response	#N/A	#N/A	0	9	0	9	0	9	0	9
	TCGA-LP-A4AX	CESC	45	FEMALE	ASIAN	[Not Available]	Stage IB1	Cervical Squamous Cell Carcinoma	G3	2011	Peri (6-12 months since last menstrual period)	-16544	Alive	TUMOR FREE	380	#N/A	#N/A	#N/A	#N/A	#N/A	#N/A	Complete Remission/Response	#N/A	#N/A	0	380	0	380	0	380	0	380
	TCGA-LP-A4AW	CESC	52	FEMALE	ASIAN	[Not Available]	Stage IA	Cervical Squamous Cell Carcinoma	G1	2011	Peri (6-12 months since last menstrual period)	-19079	Alive	TUMOR FREE	27	#N/A	#N/A	#N/A	#N/A	#N/A	#N/A	[Not Available]	#N/A	#N/A	0	27	0	27	#N/A	#N/A	0	27
	TCGA-LP-A4AV	CESC	63	FEMALE	ASIAN	[Not Available]	Stage IB	Cervical Squamous Cell Carcinoma	G2	2011	[Not Evaluated]	#N/A	Alive	TUMOR FREE	0	#N/A	#N/A	#N/A	#N/A	#N/A	#N/A	[Not Available]	#N/A	#N/A	0	0	0	0	#N/A	#N/A	0	0
	TCGA-LP-A4AU	CESC	35	FEMALE	ASIAN	[Not Available]	Stage IIIB	Cervical Squamous Cell Carcinoma	G3	2011	Pre (<6 months since LMP AND no prior bilateral ovariectomy AND not on estrogen replacement)	-13074	Alive	TUMOR FREE	343	#N/A	#N/A	#N/A	#N/A	#N/A	#N/A	[Not Available]	#N/A	#N/A	0	343	0	343	#N/A	#N/A	0	343
	TCGA-JX-A5QV	CESC	37	FEMALE	WHITE	[Not Available]	Stage IB1	Cervical Squamous Cell Carcinoma	G3	2012	Pre (<6 months since LMP AND no prior bilateral ovariectomy AND not on estrogen replacement)	-13667	Alive	TUMOR FREE	636	#N/A	#N/A	#N/A	#N/A	#N/A	#N/A	Complete Remission/Response	#N/A	#N/A	0	636	0	636	0	636	0	636
	TCGA-JX-A3Q8	CESC	40	FEMALE	ASIAN	[Not Available]	Stage IB1	Endocervical Type of Adenocarcinoma	G3	2011	Pre (<6 months since LMP AND no prior bilateral ovariectomy AND not on estrogen replacement)	-14839	Alive	TUMOR FREE	1357	#N/A	#N/A	#N/A	#N/A	#N/A	#N/A	Complete Remission/Response	#N/A	#N/A	0	1357	0	1357	0	1357	0	1357
	TCGA-JX-A3Q0	CESC	63	FEMALE	BLACK OR AFRICAN AMERICAN	[Not Available]	Stage III	Cervical Squamous Cell Carcinoma	G2	1997	Post (prior bilateral ovariectomy OR >12 mo since LMP with no prior hysterectomy)	-23313	Alive	TUMOR FREE	6375	#N/A	#N/A	#N/A	#N/A	#N/A	#N/A	Complete Remission/Response	#N/A	#N/A	0	6375	0	6375	0	6375	0	6375
	TCGA-JX-A3PZ	CESC	25	FEMALE	WHITE	[Not Available]	Stage IB	Cervical Squamous Cell Carcinoma	G2	1995	Pre (<6 months since LMP AND no prior bilateral ovariectomy AND not on estrogen replacement)	-9303	Dead	WITH TUMOR	#N/A	642	Cervical Cancer	Locoregional Recurrence	Other, specify	Pelvis	491	Complete Remission/Response	#N/A	#N/A	1	642	1	642	1	491	1	491
	TCGA-JW-AAVH	CESC	46	FEMALE	WHITE	[Not Available]	Stage IB1	Cervical Squamous Cell Carcinoma	G2	2013	Pre (<6 months since LMP AND no prior bilateral ovariectomy AND not on estrogen replacement)	-16894	Alive	TUMOR FREE	552	#N/A	#N/A	#N/A	#N/A	#N/A	#N/A	Complete Remission/Response	#N/A	#N/A	0	552	0	552	0	552	0	552
	TCGA-JW-A852	CESC	42	FEMALE	WHITE	[Not Available]	Stage IIB	Cervical Squamous Cell Carcinoma	G2	2013	Pre (<6 months since LMP AND no prior bilateral ovariectomy AND not on estrogen replacement)	-15682	Dead	WITH TUMOR	#N/A	252	Cervical Cancer	New Primary Tumor	#N/A	Breast	153	Complete Remission/Response	#N/A	#N/A	1	252	1	252	0	252	1	153
	TCGA-JW-A69B	CESC	44	FEMALE	WHITE	[Not Available]	Stage IB2	Endocervical Type of Adenocarcinoma	GX	2012	Pre (<6 months since LMP AND no prior bilateral ovariectomy AND not on estrogen replacement)	-16080	Alive	TUMOR FREE	863	#N/A	#N/A	#N/A	#N/A	#N/A	#N/A	Complete Remission/Response	#N/A	#N/A	0	863	0	863	0	863	0	863
	TCGA-JW-A5VL	CESC	37	FEMALE	AMERICAN INDIAN OR ALASKA NATIVE	[Not Available]	Stage IB2	Cervical Squamous Cell Carcinoma	G1	2012	Pre (<6 months since LMP AND no prior bilateral ovariectomy AND not on estrogen replacement)	-13604	Alive	TUMOR FREE	474	#N/A	#N/A	#N/A	#N/A	#N/A	#N/A	Complete Remission/Response	#N/A	#N/A	0	474	0	474	0	474	0	474
	TCGA-JW-A5VK	CESC	43	FEMALE	BLACK OR AFRICAN AMERICAN	[Not Available]	Stage IB2	Cervical Squamous Cell Carcinoma	G3	2012	Pre (<6 months since LMP AND no prior bilateral ovariectomy AND not on estrogen replacement)	-15965	Alive	TUMOR FREE	623	#N/A	#N/A	#N/A	#N/A	#N/A	#N/A	Complete Remission/Response	#N/A	#N/A	0	623	0	623	0	623	0	623
	TCGA-JW-A5VJ	CESC	56	FEMALE	AMERICAN INDIAN OR ALASKA NATIVE	[Not Available]	Stage IIB	Cervical Squamous Cell Carcinoma	G3	2012	Post (prior bilateral ovariectomy OR >12 mo since LMP with no prior hysterectomy)	-20714	Alive	WITH TUMOR	652	#N/A	#N/A	Distant Metastasis	Head & Neck	#N/A	267	Progressive Disease	#N/A	#N/A	0	652	0	652	#N/A	#N/A	1	267
	TCGA-JW-A5VI	CESC	45	FEMALE	AMERICAN INDIAN OR ALASKA NATIVE	[Not Available]	Stage IIB	Cervical Squamous Cell Carcinoma	G3	2012	Pre (<6 months since LMP AND no prior bilateral ovariectomy AND not on estrogen replacement)	-16444	Alive	WITH TUMOR	747	#N/A	#N/A	Distant Metastasis	Lung	#N/A	558	Complete Remission/Response	#N/A	#N/A	0	747	0	747	1	558	1	558
	TCGA-JW-A5VH	CESC	53	FEMALE	AMERICAN INDIAN OR ALASKA NATIVE	[Not Available]	Stage IVB	Cervical Squamous Cell Carcinoma	G2	2012	Pre (<6 months since LMP AND no prior bilateral ovariectomy AND not on estrogen replacement)	-19423	Dead	WITH TUMOR	#N/A	100	Cervical Cancer	Distant Metastasis	Other, specify	Brain	94	Progressive Disease	#N/A	#N/A	1	100	1	100	#N/A	#N/A	1	94
	TCGA-JW-A5VG	CESC	35	FEMALE	AMERICAN INDIAN OR ALASKA NATIVE	[Not Available]	Stage IIA	Cervical Squamous Cell Carcinoma	G3	2012	Pre (<6 months since LMP AND no prior bilateral ovariectomy AND not on estrogen replacement)	-13109	Alive	TUMOR FREE	834	#N/A	#N/A	#N/A	#N/A	#N/A	#N/A	Complete Remission/Response	#N/A	#N/A	0	834	0	834	0	834	0	834
	TCGA-IR-A3LL	CESC	60	FEMALE	WHITE	[Not Available]	Stage IB1	Cervical Squamous Cell Carcinoma	G2	2010	Post (prior bilateral ovariectomy OR >12 mo since LMP with no prior hysterectomy)	-22123	Alive	TUMOR FREE	1106	#N/A	#N/A	#N/A	#N/A	#N/A	#N/A	Complete Remission/Response	#N/A	#N/A	0	1106	0	1106	0	1106	0	1106
	TCGA-IR-A3LK	CESC	69	FEMALE	WHITE	[Not Available]	Stage IB2	Cervical Squamous Cell Carcinoma	G3	2009	Post (prior bilateral ovariectomy OR >12 mo since LMP with no prior hysterectomy)	-25440	Dead	WITH TUMOR	#N/A	908	Cervical Cancer	Distant Metastasis	Other, specify	thoracic lymph nodes, liver, abdominal wall	574	Complete Remission/Response	#N/A	#N/A	1	908	1	908	1	574	1	574
	TCGA-IR-A3LI	CESC	48	FEMALE	WHITE	[Not Available]	Stage IVB	Endocervical Type of Adenocarcinoma	G2	2005	Peri (6-12 months since last menstrual period)	-17741	Alive	TUMOR FREE	2493	#N/A	#N/A	#N/A	#N/A	#N/A	#N/A	Complete Remission/Response	#N/A	#N/A	0	2493	0	2493	#N/A	#N/A	0	2493
	TCGA-IR-A3LH	CESC	49	FEMALE	BLACK OR AFRICAN AMERICAN	[Not Available]	Stage IIA1	Cervical Squamous Cell Carcinoma	G4	2005	Pre (<6 months since LMP AND no prior bilateral ovariectomy AND not on estrogen replacement)	-18118	Alive	TUMOR FREE	2394	#N/A	#N/A	#N/A	#N/A	#N/A	#N/A	Complete Remission/Response	#N/A	#N/A	0	2394	0	2394	0	2394	0	2394
	TCGA-IR-A3LF	CESC	64	FEMALE	WHITE	[Not Available]	Stage IB1	Endocervical Adenocarcinoma of the Usual Type	G2	2004	Post (prior bilateral ovariectomy OR >12 mo since LMP with no prior hysterectomy)	-23721	Alive	TUMOR FREE	2949	#N/A	#N/A	#N/A	#N/A	#N/A	#N/A	Complete Remission/Response	#N/A	#N/A	0	2949	0	2949	0	2949	0	2949
	TCGA-IR-A3LC	CESC	40	FEMALE	WHITE	[Not Available]	Stage IB1	Cervical Squamous Cell Carcinoma	G3	2003	Pre (<6 months since LMP AND no prior bilateral ovariectomy AND not on estrogen replacement)	-14697	Alive	TUMOR FREE	3935	#N/A	#N/A	#N/A	#N/A	#N/A	#N/A	Complete Remission/Response	#N/A	#N/A	0	3935	0	3935	0	3935	0	3935
	TCGA-IR-A3LB	CESC	53	FEMALE	WHITE	[Not Available]	Stage IB1	Endocervical Type of Adenocarcinoma	G3	2002	Post (prior bilateral ovariectomy OR >12 mo since LMP with no prior hysterectomy)	-19374	Dead	WITH TUMOR	#N/A	2032	#N/A	Distant Metastasis	Lung	#N/A	317	Complete Remission/Response	#N/A	#N/A	1	2032	1	2032	1	317	1	317
	TCGA-IR-A3LA	CESC	60	FEMALE	WHITE	[Not Available]	Stage IB1	Endometrioid Adenocarcinoma of Endocervix	G3	2002	Post (prior bilateral ovariectomy OR >12 mo since LMP with no prior hysterectomy)	-21949	Alive	TUMOR FREE	4172	#N/A	#N/A	#N/A	#N/A	#N/A	#N/A	Complete Remission/Response	#N/A	#N/A	0	4172	0	4172	0	4172	0	4172
	TCGA-IR-A3L7	CESC	37	FEMALE	WHITE	[Not Available]	Stage IB1	Cervical Squamous Cell Carcinoma	G3	2000	Pre (<6 months since LMP AND no prior bilateral ovariectomy AND not on estrogen replacement)	-13559	Alive	TUMOR FREE	4483	#N/A	#N/A	#N/A	#N/A	#N/A	#N/A	Complete Remission/Response	#N/A	#N/A	0	4483	0	4483	0	4483	0	4483
	TCGA-HM-A4S6	CESC	51	FEMALE	WHITE	[Not Available]	Stage IIIB	Cervical Squamous Cell Carcinoma	G3	2012	Pre (<6 months since LMP AND no prior bilateral ovariectomy AND not on estrogen replacement)	-18903	Alive	TUMOR FREE	454	#N/A	#N/A	#N/A	#N/A	#N/A	#N/A	Complete Remission/Response	#N/A	#N/A	0	454	0	454	0	454	0	454
	TCGA-HM-A3JK	CESC	64	FEMALE	WHITE	[Not Available]	Stage IIA2	Cervical Squamous Cell Carcinoma	G3	2011	Post (prior bilateral ovariectomy OR >12 mo since LMP with no prior hysterectomy)	-23618	Alive	TUMOR FREE	632	#N/A	#N/A	#N/A	#N/A	#N/A	#N/A	Complete Remission/Response	#N/A	#N/A	0	632	0	632	0	632	0	632
	TCGA-HM-A3JJ	CESC	40	FEMALE	BLACK OR AFRICAN AMERICAN	[Not Available]	Stage IB1	Cervical Squamous Cell Carcinoma	G3	2010	Pre (<6 months since LMP AND no prior bilateral ovariectomy AND not on estrogen replacement)	-14736	Dead	WITH TUMOR	#N/A	659	Cervical Cancer	Distant Metastasis	#N/A	#N/A	385	Complete Remission/Response	#N/A	#N/A	1	659	1	659	1	385	1	385
	TCGA-HG-A2PA	CESC	38	FEMALE	WHITE	[Not Available]	Stage IB2	Cervical Squamous Cell Carcinoma	G2	2009	Pre (<6 months since LMP AND no prior bilateral ovariectomy AND not on estrogen replacement)	-14025	Dead	WITH TUMOR	#N/A	773	#N/A	#N/A	#N/A	#N/A	#N/A	Complete Remission/Response	#N/A	#N/A	1	773	1	773	#N/A	#N/A	1	773
	TCGA-GH-A9DA	CESC	27	FEMALE	WHITE	[Not Available]	Stage IB1	Cervical Squamous Cell Carcinoma	G3	2013	[Not Evaluated]	-10160	Alive	TUMOR FREE	540	#N/A	#N/A	#N/A	#N/A	#N/A	#N/A	Complete Remission/Response	#N/A	#N/A	0	540	0	540	0	540	0	540
	TCGA-FU-A770	CESC	33	FEMALE	WHITE	[Not Available]	Stage IIIB	Endocervical Adenocarcinoma of the Usual Type	G2	2013	Pre (<6 months since LMP AND no prior bilateral ovariectomy AND not on estrogen replacement)	-12248	Alive	TUMOR FREE	34	#N/A	#N/A	#N/A	#N/A	#N/A	#N/A	[Unknown]	#N/A	#N/A	0	34	0	34	#N/A	#N/A	0	34
	TCGA-FU-A5XV	CESC	32	FEMALE	WHITE	[Not Available]	Stage IIIB	Cervical Squamous Cell Carcinoma	G3	2012	Pre (<6 months since LMP AND no prior bilateral ovariectomy AND not on estrogen replacement)	-11692	Alive	TUMOR FREE	321	#N/A	#N/A	#N/A	#N/A	#N/A	#N/A	Complete Remission/Response	#N/A	#N/A	0	321	0	321	0	321	0	321
	TCGA-FU-A57G	CESC	49	FEMALE	WHITE	[Not Available]	Stage IB2	Endocervical Type of Adenocarcinoma	G2	2011	Pre (<6 months since LMP AND no prior bilateral ovariectomy AND not on estrogen replacement)	-17905	Alive	TUMOR FREE	1078	#N/A	#N/A	#N/A	#N/A	#N/A	#N/A	Complete Remission/Response	#N/A	#N/A	0	1078	0	1078	0	1078	0	1078
	TCGA-FU-A40J	CESC	38	FEMALE	WHITE	[Not Available]	Stage IIIB	Endocervical Type of Adenocarcinoma	G3	2012	Pre (<6 months since LMP AND no prior bilateral ovariectomy AND not on estrogen replacement)	-14182	Alive	TUMOR FREE	426	#N/A	#N/A	#N/A	#N/A	#N/A	#N/A	Complete Remission/Response	#N/A	#N/A	0	426	0	426	0	426	0	426
	TCGA-FU-A3YQ	CESC	35	FEMALE	WHITE	[Not Available]	Stage IB1	Cervical Squamous Cell Carcinoma	G1	2012	Pre (<6 months since LMP AND no prior bilateral ovariectomy AND not on estrogen replacement)	-12816	Alive	TUMOR FREE	861	#N/A	#N/A	#N/A	#N/A	#N/A	#N/A	Complete Remission/Response	#N/A	#N/A	0	861	0	861	0	861	0	861
	TCGA-FU-A3WB	CESC	43	FEMALE	WHITE	[Not Available]	Stage IIA2	Cervical Squamous Cell Carcinoma	G2	2012	[Unknown]	-15833	Alive	TUMOR FREE	491	#N/A	#N/A	#N/A	#N/A	#N/A	#N/A	Complete Remission/Response	#N/A	#N/A	0	491	0	491	0	491	0	491
	TCGA-FU-A3TX	CESC	78	FEMALE	[Not Evaluated]	[Not Available]	Stage IB2	Cervical Squamous Cell Carcinoma	G3	2012	Post (prior bilateral ovariectomy OR >12 mo since LMP with no prior hysterectomy)	-28825	Alive	#N/A	45	#N/A	#N/A	#N/A	#N/A	#N/A	#N/A	[Unknown]	#N/A	#N/A	0	45	0	45	#N/A	#N/A	0	45
	TCGA-FU-A3TQ	CESC	55	FEMALE	WHITE	[Not Available]	Stage IIIB	Cervical Squamous Cell Carcinoma	G2	2010	Post (prior bilateral ovariectomy OR >12 mo since LMP with no prior hysterectomy)	-20302	Alive	TUMOR FREE	795	#N/A	#N/A	#N/A	#N/A	#N/A	#N/A	Complete Remission/Response	#N/A	#N/A	0	795	0	795	0	795	0	795
	TCGA-FU-A3NI	CESC	45	FEMALE	WHITE	[Not Available]	Stage IB1	Cervical Squamous Cell Carcinoma	G2	2010	Pre (<6 months since LMP AND no prior bilateral ovariectomy AND not on estrogen replacement)	-16533	Dead	TUMOR FREE	#N/A	638	#N/A	#N/A	#N/A	#N/A	#N/A	[Not Available]	#N/A	#N/A	1	638	0	638	#N/A	#N/A	0	638
	TCGA-FU-A3HZ	CESC	64	FEMALE	WHITE	[Not Available]	Stage IIA2	Cervical Squamous Cell Carcinoma	G3	2010	Post (prior bilateral ovariectomy OR >12 mo since LMP with no prior hysterectomy)	-23565	Alive	TUMOR FREE	1103	#N/A	#N/A	#N/A	#N/A	#N/A	#N/A	Complete Remission/Response	#N/A	#N/A	0	1103	0	1103	0	1103	0	1103
	TCGA-FU-A3HY	CESC	47	FEMALE	WHITE	[Not Available]	Stage IB2	Cervical Squamous Cell Carcinoma	G2	2011	Pre (<6 months since LMP AND no prior bilateral ovariectomy AND not on estrogen replacement)	-17228	Alive	TUMOR FREE	954	#N/A	#N/A	#N/A	#N/A	#N/A	#N/A	Complete Remission/Response	#N/A	#N/A	0	954	0	954	0	954	0	954
	TCGA-FU-A3EO	CESC	55	FEMALE	WHITE	[Not Available]	Stage IIB	Endocervical Type of Adenocarcinoma	G2	2011	Post (prior bilateral ovariectomy OR >12 mo since LMP with no prior hysterectomy)	-20207	Alive	TUMOR FREE	490	#N/A	#N/A	#N/A	#N/A	#N/A	#N/A	Complete Remission/Response	#N/A	#N/A	0	490	0	490	0	490	0	490
	TCGA-FU-A2QG	CESC	29	FEMALE	WHITE	[Not Available]	Stage IB1	Cervical Squamous Cell Carcinoma	G2	2011	Peri (6-12 months since last menstrual period)	-10865	Alive	TUMOR FREE	579	#N/A	#N/A	#N/A	#N/A	#N/A	#N/A	Complete Remission/Response	#N/A	#N/A	0	579	0	579	0	579	0	579
	TCGA-FU-A23L	CESC	60	FEMALE	WHITE	[Not Available]	Stage IIA1	Cervical Squamous Cell Carcinoma	G3	2010	Post (prior bilateral ovariectomy OR >12 mo since LMP with no prior hysterectomy)	-21962	Alive	TUMOR FREE	725	#N/A	#N/A	#N/A	#N/A	#N/A	#N/A	Complete Remission/Response	#N/A	#N/A	0	725	0	725	0	725	0	725
	TCGA-FU-A23K	CESC	28	FEMALE	WHITE	[Not Available]	Stage IIIB	Cervical Squamous Cell Carcinoma	G3	2010	Pre (<6 months since LMP AND no prior bilateral ovariectomy AND not on estrogen replacement)	-10551	Alive	TUMOR FREE	372	#N/A	#N/A	#N/A	#N/A	#N/A	#N/A	Complete Remission/Response	#N/A	#N/A	0	372	0	372	0	372	0	372
	TCGA-EX-A8YF	CESC	44	FEMALE	WHITE	[Not Available]	Stage IB1	Cervical Squamous Cell Carcinoma	G3	2013	Pre (<6 months since LMP AND no prior bilateral ovariectomy AND not on estrogen replacement)	-16258	Alive	WITH TUMOR	473	#N/A	#N/A	Locoregional Recurrence	Other, specify	Vagina	396	Complete Remission/Response	#N/A	#N/A	0	473	0	473	1	396	1	396
	TCGA-EX-A69M	CESC	62	FEMALE	WHITE	[Not Available]	Stage IB2	Cervical Squamous Cell Carcinoma	G3	2012	Post (prior bilateral ovariectomy OR >12 mo since LMP with no prior hysterectomy)	-22917	Dead	TUMOR FREE	#N/A	253	#N/A	New Primary Tumor	Lung	#N/A	77	Complete Remission/Response	#N/A	#N/A	1	253	0	253	0	253	1	77
	TCGA-EX-A69L	CESC	41	FEMALE	ASIAN	[Not Available]	Stage IB1	Cervical Squamous Cell Carcinoma	G3	2012	Pre (<6 months since LMP AND no prior bilateral ovariectomy AND not on estrogen replacement)	-15121	Alive	TUMOR FREE	602	#N/A	#N/A	#N/A	#N/A	#N/A	#N/A	Complete Remission/Response	#N/A	#N/A	0	602	0	602	0	602	0	602
	TCGA-EX-A449	CESC	42	FEMALE	WHITE	[Not Available]	Stage IVB	Endocervical Type of Adenocarcinoma	G1	2012	Pre (<6 months since LMP AND no prior bilateral ovariectomy AND not on estrogen replacement)	-15559	Alive	TUMOR FREE	447	#N/A	#N/A	#N/A	#N/A	#N/A	#N/A	Complete Remission/Response	#N/A	#N/A	0	447	0	447	#N/A	#N/A	0	447
	TCGA-EX-A3L1	CESC	32	FEMALE	WHITE	[Not Available]	Stage IIA1	Cervical Squamous Cell Carcinoma	G3	2011	Pre (<6 months since LMP AND no prior bilateral ovariectomy AND not on estrogen replacement)	-11943	Alive	TUMOR FREE	463	#N/A	#N/A	#N/A	#N/A	#N/A	#N/A	Complete Remission/Response	#N/A	#N/A	0	463	0	463	0	463	0	463
	TCGA-EX-A1H6	CESC	38	FEMALE	WHITE	[Not Available]	Stage IB1	Endocervical Type of Adenocarcinoma	G1	2009	Pre (<6 months since LMP AND no prior bilateral ovariectomy AND not on estrogen replacement)	-14214	Alive	TUMOR FREE	241	#N/A	#N/A	#N/A	#N/A	#N/A	#N/A	Complete Remission/Response	#N/A	#N/A	0	241	0	241	0	241	0	241
	TCGA-EX-A1H5	CESC	58	FEMALE	BLACK OR AFRICAN AMERICAN	[Not Available]	Stage IIB	Cervical Squamous Cell Carcinoma	G3	2010	Post (prior bilateral ovariectomy OR >12 mo since LMP with no prior hysterectomy)	-21338	Alive	TUMOR FREE	619	#N/A	#N/A	#N/A	#N/A	#N/A	#N/A	Complete Remission/Response	#N/A	#N/A	0	619	0	619	0	619	0	619
	TCGA-EK-A3GN	CESC	47	FEMALE	WHITE	[Not Available]	Stage IIIB	Cervical Squamous Cell Carcinoma	G3	2005	[Not Available]	-17425	Alive	WITH TUMOR	27	#N/A	#N/A	#N/A	#N/A	#N/A	#N/A	[Not Available]	#N/A	#N/A	0	27	0	27	#N/A	#N/A	0	27
	TCGA-EK-A3GM	CESC	65	FEMALE	WHITE	[Not Available]	Stage IIA	Endocervical Type of Adenocarcinoma	G2	2006	Post (prior bilateral ovariectomy OR >12 mo since LMP with no prior hysterectomy)	-23879	Alive	#N/A	0	#N/A	#N/A	#N/A	#N/A	#N/A	#N/A	[Not Available]	#N/A	#N/A	0	0	0	0	#N/A	#N/A	0	0
	TCGA-EK-A3GK	CESC	33	FEMALE	WHITE	[Not Available]	Stage IB1	Endocervical Type of Adenocarcinoma	G3	2009	[Not Available]	-12207	Alive	TUMOR FREE	15	#N/A	#N/A	#N/A	#N/A	#N/A	#N/A	[Not Available]	#N/A	#N/A	0	15	0	15	#N/A	#N/A	0	15
	TCGA-EK-A3GJ	CESC	51	FEMALE	NATIVE HAWAIIAN OR OTHER PACIFIC ISLANDER	[Not Available]	Stage IB1	Cervical Squamous Cell Carcinoma	G3	2010	[Not Available]	-18630	Alive	[Discrepancy]	3	#N/A	#N/A	#N/A	#N/A	#N/A	#N/A	[Not Available]	#N/A	#N/A	0	3	0	3	#N/A	#N/A	0	3
	TCGA-EK-A2RO	CESC	59	FEMALE	AMERICAN INDIAN OR ALASKA NATIVE	[Not Available]	Stage IIB	Cervical Squamous Cell Carcinoma	G1	2010	Post (prior bilateral ovariectomy OR >12 mo since LMP with no prior hysterectomy)	-21844	Alive	WITH TUMOR	2	#N/A	#N/A	#N/A	#N/A	#N/A	#N/A	[Not Available]	#N/A	#N/A	0	2	0	2	#N/A	#N/A	0	2
	TCGA-EK-A2RN	CESC	45	FEMALE	WHITE	[Not Available]	Stage IB1	Cervical Squamous Cell Carcinoma	G2	2009	Post (prior bilateral ovariectomy OR >12 mo since LMP with no prior hysterectomy)	-16487	Alive	WITH TUMOR	71	#N/A	#N/A	#N/A	#N/A	#N/A	#N/A	[Not Available]	#N/A	#N/A	0	71	0	71	#N/A	#N/A	0	71
	TCGA-EK-A2RM	CESC	40	FEMALE	WHITE	[Not Available]	Stage IB	Cervical Squamous Cell Carcinoma	G3	2009	[Not Available]	-14842	Alive	WITH TUMOR	50	#N/A	#N/A	#N/A	#N/A	#N/A	#N/A	[Not Available]	#N/A	#N/A	0	50	0	50	#N/A	#N/A	0	50
	TCGA-EK-A2RL	CESC	32	FEMALE	BLACK OR AFRICAN AMERICAN	[Not Available]	Stage IB	Endocervical Type of Adenocarcinoma	G2	2009	[Not Available]	-12047	Dead	WITH TUMOR	#N/A	1453	Cervical Cancer	Locoregional Recurrence	Cervix	#N/A	1143	Progressive Disease	#N/A	#N/A	1	1453	1	1453	#N/A	#N/A	1	1143
	TCGA-EK-A2RK	CESC	67	FEMALE	WHITE	[Not Available]	Stage IA2	Cervical Squamous Cell Carcinoma	G3	2009	Post (prior bilateral ovariectomy OR >12 mo since LMP with no prior hysterectomy)	-24541	Alive	#N/A	13	#N/A	#N/A	#N/A	#N/A	#N/A	#N/A	[Not Available]	#N/A	#N/A	0	13	0	13	#N/A	#N/A	0	13
	TCGA-EK-A2RJ	CESC	51	FEMALE	WHITE	[Not Available]	Stage IB2	Cervical Squamous Cell Carcinoma	G3	2009	[Not Available]	-18664	Alive	TUMOR FREE	53	#N/A	#N/A	#N/A	#N/A	#N/A	#N/A	[Not Available]	#N/A	#N/A	0	53	0	53	#N/A	#N/A	0	53
	TCGA-EK-A2RE	CESC	26	FEMALE	WHITE	[Not Available]	Stage IIA	Cervical Squamous Cell Carcinoma	G2	2010	Pre (<6 months since LMP AND no prior bilateral ovariectomy AND not on estrogen replacement)	-9743	Alive	TUMOR FREE	57	#N/A	#N/A	#N/A	#N/A	#N/A	#N/A	[Not Available]	#N/A	#N/A	0	57	0	57	#N/A	#N/A	0	57
	TCGA-EK-A2RC	CESC	33	FEMALE	[Not Available]	[Not Available]	Stage IB1	Cervical Squamous Cell Carcinoma	G3	2009	[Not Available]	-12353	Alive	TUMOR FREE	129	#N/A	#N/A	#N/A	#N/A	#N/A	#N/A	[Not Available]	#N/A	#N/A	0	129	0	129	#N/A	#N/A	0	129
	TCGA-EK-A2RB	CESC	48	FEMALE	WHITE	[Not Available]	Stage IVB	Cervical Squamous Cell Carcinoma	G3	2011	[Not Available]	-17752	Alive	TUMOR FREE	9	#N/A	#N/A	#N/A	#N/A	#N/A	#N/A	[Not Available]	#N/A	#N/A	0	9	0	9	#N/A	#N/A	0	9
	TCGA-EK-A2RA	CESC	74	FEMALE	[Not Available]	[Not Available]	Stage IIA2	Cervical Squamous Cell Carcinoma	G3	2011	[Not Available]	-27209	Alive	WITH TUMOR	1246	#N/A	#N/A	#N/A	#N/A	#N/A	#N/A	[Not Available]	#N/A	#N/A	0	1246	0	1246	#N/A	#N/A	0	1246
	TCGA-EK-A2R9	CESC	58	FEMALE	WHITE	[Not Available]	Stage IB1	Cervical Squamous Cell Carcinoma	G3	2011	[Not Available]	-21242	Alive	WITH TUMOR	4	#N/A	#N/A	#N/A	#N/A	#N/A	#N/A	[Not Available]	#N/A	#N/A	0	4	0	4	#N/A	#N/A	0	4
	TCGA-EK-A2R8	CESC	48	FEMALE	WHITE	[Not Available]	Stage IB2	Cervical Squamous Cell Carcinoma	G3	2010	Pre (<6 months since LMP AND no prior bilateral ovariectomy AND not on estrogen replacement)	-17692	Alive	WITH TUMOR	44	#N/A	#N/A	#N/A	#N/A	#N/A	#N/A	[Not Available]	#N/A	#N/A	0	44	0	44	#N/A	#N/A	0	44
	TCGA-EK-A2R7	CESC	45	FEMALE	WHITE	[Not Available]	Stage IB	Cervical Squamous Cell Carcinoma	G3	2010	Pre (<6 months since LMP AND no prior bilateral ovariectomy AND not on estrogen replacement)	-16487	Alive	TUMOR FREE	27	#N/A	#N/A	#N/A	#N/A	#N/A	#N/A	[Not Available]	#N/A	#N/A	0	27	0	27	#N/A	#N/A	0	27
	TCGA-EK-A2PM	CESC	81	FEMALE	WHITE	[Not Available]	Stage IIB	Cervical Squamous Cell Carcinoma	G3	2008	Post (prior bilateral ovariectomy OR >12 mo since LMP with no prior hysterectomy)	-29747	Alive	WITH TUMOR	18	#N/A	#N/A	#N/A	#N/A	#N/A	#N/A	[Not Available]	#N/A	#N/A	0	18	0	18	#N/A	#N/A	0	18
	TCGA-EK-A2PL	CESC	36	FEMALE	WHITE	[Not Available]	Stage IIIB	Cervical Squamous Cell Carcinoma	[Not Available]	2008	[Not Available]	-13384	Alive	WITH TUMOR	13	#N/A	#N/A	#N/A	#N/A	#N/A	#N/A	[Not Available]	#N/A	#N/A	0	13	0	13	#N/A	#N/A	0	13
	TCGA-EK-A2PK	CESC	43	FEMALE	WHITE	[Not Available]	Stage IB1	Cervical Squamous Cell Carcinoma	G3	2006	Indeterminate (neither Pre or Postmenopausal)	-15939	Alive	TUMOR FREE	12	#N/A	#N/A	#N/A	#N/A	#N/A	#N/A	[Not Available]	#N/A	#N/A	0	12	0	12	#N/A	#N/A	0	12
	TCGA-EK-A2PI	CESC	44	FEMALE	WHITE	[Not Available]	Stage IIIB	Cervical Squamous Cell Carcinoma	G2	2009	[Not Available]	-16324	Alive	WITH TUMOR	586	#N/A	#N/A	#N/A	#N/A	#N/A	#N/A	[Not Available]	#N/A	#N/A	0	586	0	586	#N/A	#N/A	0	586
	TCGA-EK-A2PG	CESC	88	FEMALE	BLACK OR AFRICAN AMERICAN	[Not Available]	[Not Available]	Cervical Squamous Cell Carcinoma	G3	2005	Post (prior bilateral ovariectomy OR >12 mo since LMP with no prior hysterectomy)	-32500	Alive	#N/A	46	#N/A	#N/A	#N/A	#N/A	#N/A	#N/A	[Not Available]	#N/A	#N/A	0	46	0	46	#N/A	#N/A	0	46
	TCGA-EK-A2IR	CESC	48	FEMALE	WHITE	[Not Available]	Stage IB2	Cervical Squamous Cell Carcinoma	G3	1997	[Not Available]	-17581	Alive	TUMOR FREE	3442	#N/A	#N/A	#N/A	#N/A	#N/A	#N/A	Complete Remission/Response	#N/A	#N/A	0	3442	0	3442	0	3442	0	3442
	TCGA-EK-A2IP	CESC	28	FEMALE	WHITE	[Not Available]	Stage IB1	Cervical Squamous Cell Carcinoma	G3	2006	[Not Available]	-10347	Alive	#N/A	202	#N/A	#N/A	#N/A	#N/A	#N/A	#N/A	[Not Available]	#N/A	#N/A	0	202	0	202	#N/A	#N/A	0	202
	TCGA-EK-A2H1	CESC	20	FEMALE	WHITE	[Not Available]	Stage IB2	Cervical Squamous Cell Carcinoma	G3	2007	Pre (<6 months since LMP AND no prior bilateral ovariectomy AND not on estrogen replacement)	-7649	Alive	TUMOR FREE	799	#N/A	#N/A	#N/A	#N/A	#N/A	#N/A	[Not Available]	#N/A	#N/A	0	799	0	799	#N/A	#N/A	0	799
	TCGA-EK-A2H0	CESC	24	FEMALE	WHITE	[Not Available]	Stage IIB	Cervical Squamous Cell Carcinoma	G3	2007	Pre (<6 months since LMP AND no prior bilateral ovariectomy AND not on estrogen replacement)	-8918	Alive	TUMOR FREE	1847	#N/A	#N/A	#N/A	#N/A	#N/A	#N/A	Complete Remission/Response	#N/A	#N/A	0	1847	0	1847	0	1847	0	1847
	TCGA-EK-A2GZ	CESC	64	FEMALE	BLACK OR AFRICAN AMERICAN	[Not Available]	Stage IIIB	Cervical Squamous Cell Carcinoma	G2	2008	Post (prior bilateral ovariectomy OR >12 mo since LMP with no prior hysterectomy)	-23599	Alive	WITH TUMOR	383	#N/A	#N/A	#N/A	#N/A	#N/A	#N/A	[Not Available]	#N/A	#N/A	0	383	0	383	#N/A	#N/A	0	383
	TCGA-EA-A97N	CESC	38	FEMALE	WHITE	[Not Available]	Stage IB2	Cervical Squamous Cell Carcinoma	G2	2013	Pre (<6 months since LMP AND no prior bilateral ovariectomy AND not on estrogen replacement)	-13984	Alive	TUMOR FREE	11	#N/A	#N/A	#N/A	#N/A	#N/A	#N/A	Complete Remission/Response	#N/A	#N/A	0	11	0	11	0	11	0	11
	TCGA-EA-A78R	CESC	54	FEMALE	ASIAN	[Not Available]	Stage IB1	Cervical Squamous Cell Carcinoma	G2	2013	Peri (6-12 months since last menstrual period)	-19942	Alive	TUMOR FREE	410	#N/A	#N/A	#N/A	#N/A	#N/A	#N/A	Complete Remission/Response	#N/A	#N/A	0	410	0	410	0	410	0	410
	TCGA-EA-A6QX	CESC	49	FEMALE	ASIAN	[Not Available]	Stage IIIB	Cervical Squamous Cell Carcinoma	G3	2013	Peri (6-12 months since last menstrual period)	-18035	Alive	TUMOR FREE	730	#N/A	#N/A	#N/A	#N/A	#N/A	#N/A	Complete Remission/Response	#N/A	#N/A	0	730	0	730	0	730	0	730
	TCGA-EA-A5ZF	CESC	56	FEMALE	ASIAN	[Not Available]	Stage IB1	Cervical Squamous Cell Carcinoma	G2	2012	Peri (6-12 months since last menstrual period)	-20506	Alive	WITH TUMOR	828	#N/A	#N/A	Locoregional Recurrence	Cervix	#N/A	440	Complete Remission/Response	#N/A	#N/A	0	828	0	828	1	440	1	440
	TCGA-EA-A5ZE	CESC	54	FEMALE	ASIAN	[Not Available]	Stage IB1	Cervical Squamous Cell Carcinoma	G3	2012	Peri (6-12 months since last menstrual period)	-19868	Alive	TUMOR FREE	829	#N/A	#N/A	Distant Metastasis	Other, specify	Lymph node, inguinal	425	Complete Remission/Response	#N/A	#N/A	0	829	0	829	1	425	1	425
	TCGA-EA-A5ZD	CESC	40	FEMALE	ASIAN	[Not Available]	Stage IB1	Cervical Squamous Cell Carcinoma	G2	2012	Pre (<6 months since LMP AND no prior bilateral ovariectomy AND not on estrogen replacement)	-14629	Alive	TUMOR FREE	830	#N/A	#N/A	#N/A	#N/A	#N/A	#N/A	Complete Remission/Response	#N/A	#N/A	0	830	0	830	0	830	0	830
	TCGA-EA-A5O9	CESC	39	FEMALE	WHITE	[Not Available]	Stage IB2	Cervical Squamous Cell Carcinoma	G2	2012	Pre (<6 months since LMP AND no prior bilateral ovariectomy AND not on estrogen replacement)	-14472	Alive	TUMOR FREE	788	#N/A	#N/A	#N/A	#N/A	#N/A	#N/A	Complete Remission/Response	#N/A	#N/A	0	788	0	788	0	788	0	788
	TCGA-EA-A5FO	CESC	59	FEMALE	WHITE	[Not Available]	Stage IB1	Cervical Squamous Cell Carcinoma	G2	2012	Post (prior bilateral ovariectomy OR >12 mo since LMP with no prior hysterectomy)	-21561	Alive	TUMOR FREE	815	#N/A	#N/A	#N/A	#N/A	#N/A	#N/A	Complete Remission/Response	#N/A	#N/A	0	815	0	815	0	815	0	815
	TCGA-EA-A556	CESC	38	FEMALE	WHITE	[Not Available]	Stage IB1	Endometrioid Adenocarcinoma of Endocervix	G3	2012	Pre (<6 months since LMP AND no prior bilateral ovariectomy AND not on estrogen replacement)	-13988	Alive	TUMOR FREE	453	#N/A	#N/A	#N/A	#N/A	#N/A	#N/A	Complete Remission/Response	#N/A	#N/A	0	453	0	453	0	453	0	453
	TCGA-EA-A50E	CESC	45	FEMALE	ASIAN	[Not Available]	Stage IVA	Cervical Squamous Cell Carcinoma	G2	2012	Pre (<6 months since LMP AND no prior bilateral ovariectomy AND not on estrogen replacement)	-16609	Dead	WITH TUMOR	#N/A	227	Cervical Cancer	Locoregional Recurrence	Vulva	#N/A	208	Progressive Disease	#N/A	#N/A	1	227	1	227	#N/A	#N/A	1	208
	TCGA-EA-A4BA	CESC	49	FEMALE	WHITE	[Not Available]	Stage IB2	Endocervical Type of Adenocarcinoma	G2	2012	Pre (<6 months since LMP AND no prior bilateral ovariectomy AND not on estrogen replacement)	-17995	Alive	TUMOR FREE	755	#N/A	#N/A	#N/A	#N/A	#N/A	#N/A	Complete Remission/Response	#N/A	#N/A	0	755	0	755	0	755	0	755
	TCGA-EA-A44S	CESC	31	FEMALE	WHITE	[Not Available]	Stage IIIB	Cervical Squamous Cell Carcinoma	G2	2012	Pre (<6 months since LMP AND no prior bilateral ovariectomy AND not on estrogen replacement)	-11621	Alive	TUMOR FREE	369	#N/A	#N/A	#N/A	#N/A	#N/A	#N/A	Stable Disease	#N/A	#N/A	0	369	0	369	#N/A	#N/A	0	369
	TCGA-EA-A43B	CESC	43	FEMALE	WHITE	[Not Available]	Stage IB1	Cervical Squamous Cell Carcinoma	G2	2012	Pre (<6 months since LMP AND no prior bilateral ovariectomy AND not on estrogen replacement)	-15871	Alive	TUMOR FREE	791	#N/A	#N/A	#N/A	#N/A	#N/A	#N/A	Complete Remission/Response	#N/A	#N/A	0	791	0	791	0	791	0	791
	TCGA-EA-A439	CESC	50	FEMALE	ASIAN	[Not Available]	Stage IIA1	Cervical Squamous Cell Carcinoma	G3	2012	Pre (<6 months since LMP AND no prior bilateral ovariectomy AND not on estrogen replacement)	-18529	Alive	TUMOR FREE	965	#N/A	#N/A	Locoregional Recurrence	Cervix	#N/A	316	Complete Remission/Response	#N/A	#N/A	0	965	0	965	1	316	1	316
	TCGA-EA-A411	CESC	50	FEMALE	WHITE	[Not Available]	Stage IB1	Cervical Squamous Cell Carcinoma	G2	2012	Post (prior bilateral ovariectomy OR >12 mo since LMP with no prior hysterectomy)	-18561	Alive	TUMOR FREE	747	#N/A	#N/A	#N/A	#N/A	#N/A	#N/A	Complete Remission/Response	#N/A	#N/A	0	747	0	747	0	747	0	747
	TCGA-EA-A410	CESC	51	FEMALE	WHITE	[Not Available]	Stage IIA2	Cervical Squamous Cell Carcinoma	G2	2012	Pre (<6 months since LMP AND no prior bilateral ovariectomy AND not on estrogen replacement)	-18720	Alive	TUMOR FREE	803	#N/A	#N/A	#N/A	#N/A	#N/A	#N/A	Complete Remission/Response	#N/A	#N/A	0	803	0	803	0	803	0	803
	TCGA-EA-A3Y4	CESC	40	FEMALE	WHITE	[Not Available]	Stage IB	Cervical Squamous Cell Carcinoma	G3	2012	Pre (<6 months since LMP AND no prior bilateral ovariectomy AND not on estrogen replacement)	-14706	Alive	TUMOR FREE	1122	#N/A	#N/A	#N/A	#N/A	#N/A	#N/A	Complete Remission/Response	#N/A	#N/A	0	1122	0	1122	0	1122	0	1122
	TCGA-EA-A3QE	CESC	45	FEMALE	WHITE	[Not Available]	Stage IB	Cervical Squamous Cell Carcinoma	G2	2011	Pre (<6 months since LMP AND no prior bilateral ovariectomy AND not on estrogen replacement)	-16460	Alive	TUMOR FREE	761	#N/A	#N/A	#N/A	#N/A	#N/A	#N/A	Complete Remission/Response	#N/A	#N/A	0	761	0	761	0	761	0	761
	TCGA-EA-A3QD	CESC	59	FEMALE	WHITE	[Not Available]	Stage IIIB	Cervical Squamous Cell Carcinoma	G3	2011	Post (prior bilateral ovariectomy OR >12 mo since LMP with no prior hysterectomy)	-21655	Alive	TUMOR FREE	397	#N/A	#N/A	#N/A	#N/A	#N/A	#N/A	Complete Remission/Response	#N/A	#N/A	0	397	0	397	0	397	0	397
	TCGA-EA-A3HU	CESC	43	FEMALE	WHITE	[Not Available]	Stage II	Cervical Squamous Cell Carcinoma	G2	2011	Pre (<6 months since LMP AND no prior bilateral ovariectomy AND not on estrogen replacement)	-15909	Alive	TUMOR FREE	1013	#N/A	#N/A	#N/A	#N/A	#N/A	#N/A	Complete Remission/Response	#N/A	#N/A	0	1013	0	1013	0	1013	0	1013
	TCGA-EA-A3HT	CESC	68	FEMALE	WHITE	[Not Available]	Stage IB	Cervical Squamous Cell Carcinoma	G1	2011	Post (prior bilateral ovariectomy OR >12 mo since LMP with no prior hysterectomy)	-25138	Alive	TUMOR FREE	954	#N/A	#N/A	#N/A	#N/A	#N/A	#N/A	Complete Remission/Response	#N/A	#N/A	0	954	0	954	0	954	0	954
	TCGA-EA-A3HS	CESC	35	FEMALE	WHITE	[Not Available]	Stage IB	Cervical Squamous Cell Carcinoma	G1	2011	Pre (<6 months since LMP AND no prior bilateral ovariectomy AND not on estrogen replacement)	-13117	Alive	TUMOR FREE	959	#N/A	#N/A	#N/A	#N/A	#N/A	#N/A	Complete Remission/Response	#N/A	#N/A	0	959	0	959	0	959	0	959
	TCGA-EA-A3HR	CESC	57	FEMALE	WHITE	[Not Available]	Stage II	Cervical Squamous Cell Carcinoma	G2	2011	Post (prior bilateral ovariectomy OR >12 mo since LMP with no prior hysterectomy)	-20980	Alive	TUMOR FREE	940	#N/A	#N/A	#N/A	#N/A	#N/A	#N/A	Complete Remission/Response	#N/A	#N/A	0	940	0	940	0	940	0	940
	TCGA-EA-A3HQ	CESC	60	FEMALE	WHITE	[Not Available]	Stage II	Cervical Squamous Cell Carcinoma	G2	2011	Post (prior bilateral ovariectomy OR >12 mo since LMP with no prior hysterectomy)	-21966	Alive	TUMOR FREE	1136	#N/A	#N/A	#N/A	#N/A	#N/A	#N/A	Complete Remission/Response	#N/A	#N/A	0	1136	0	1136	0	1136	0	1136
	TCGA-EA-A1QT	CESC	47	FEMALE	WHITE	[Not Available]	Stage IB	Cervical Squamous Cell Carcinoma	G2	2011	Post (prior bilateral ovariectomy OR >12 mo since LMP with no prior hysterectomy)	-17475	Alive	TUMOR FREE	1243	#N/A	#N/A	#N/A	#N/A	#N/A	#N/A	Complete Remission/Response	#N/A	#N/A	0	1243	0	1243	0	1243	0	1243
	TCGA-EA-A1QS	CESC	46	FEMALE	WHITE	[Not Available]	Stage IB1	Cervical Squamous Cell Carcinoma	G2	2010	Post (prior bilateral ovariectomy OR >12 mo since LMP with no prior hysterectomy)	-16923	Alive	TUMOR FREE	1203	#N/A	#N/A	#N/A	#N/A	#N/A	#N/A	Complete Remission/Response	#N/A	#N/A	0	1203	0	1203	0	1203	0	1203
	TCGA-DS-A7WI	CESC	43	FEMALE	WHITE	[Not Available]	Stage IIA2	Cervical Squamous Cell Carcinoma	G2	2013	Pre (<6 months since LMP AND no prior bilateral ovariectomy AND not on estrogen replacement)	-15970	Dead	WITH TUMOR	#N/A	252	Cervical Cancer	Locoregional Recurrence	Other, specify	Retroperitoneum	206	Complete Remission/Response	#N/A	#N/A	1	252	1	252	1	206	1	206
	TCGA-DS-A7WH	CESC	34	FEMALE	WHITE	[Not Available]	Stage IB1	Mucinous Adenocarcinoma of Endocervical Type	G2	2013	Pre (<6 months since LMP AND no prior bilateral ovariectomy AND not on estrogen replacement)	-12644	Alive	TUMOR FREE	533	#N/A	#N/A	#N/A	#N/A	#N/A	#N/A	Complete Remission/Response	#N/A	#N/A	0	533	0	533	0	533	0	533
	TCGA-DS-A5RQ	CESC	80	FEMALE	WHITE	[Not Available]	Stage IB1	Cervical Squamous Cell Carcinoma	G2	2012	Post (prior bilateral ovariectomy OR >12 mo since LMP with no prior hysterectomy)	-29526	Alive	TUMOR FREE	512	#N/A	#N/A	#N/A	#N/A	#N/A	#N/A	Complete Remission/Response	#N/A	#N/A	0	512	0	512	0	512	0	512
	TCGA-DS-A3LQ	CESC	46	FEMALE	[Not Available]	[Not Available]	Stage IIIB	Cervical Squamous Cell Carcinoma	G3	2011	Pre (<6 months since LMP AND no prior bilateral ovariectomy AND not on estrogen replacement)	-16861	Alive	TUMOR FREE	699	#N/A	#N/A	#N/A	#N/A	#N/A	#N/A	Complete Remission/Response	#N/A	#N/A	0	699	0	699	0	699	0	699
	TCGA-DS-A1OD	CESC	49	FEMALE	WHITE	[Not Available]	Stage IB1	Cervical Squamous Cell Carcinoma	G3	2003	Pre (<6 months since LMP AND no prior bilateral ovariectomy AND not on estrogen replacement)	-17954	Alive	TUMOR FREE	3874	#N/A	#N/A	#N/A	#N/A	#N/A	#N/A	Complete Remission/Response	#N/A	#N/A	0	3874	0	3874	0	3874	0	3874
	TCGA-DS-A1OC	CESC	47	FEMALE	WHITE	[Not Available]	Stage IB	Cervical Squamous Cell Carcinoma	G2	2010	Pre (<6 months since LMP AND no prior bilateral ovariectomy AND not on estrogen replacement)	-17357	Alive	TUMOR FREE	376	#N/A	#N/A	#N/A	#N/A	#N/A	#N/A	Complete Remission/Response	#N/A	#N/A	0	376	0	376	0	376	0	376
	TCGA-DS-A1OB	CESC	45	FEMALE	WHITE	[Not Available]	Stage IB	Cervical Squamous Cell Carcinoma	G2	2007	Pre (<6 months since LMP AND no prior bilateral ovariectomy AND not on estrogen replacement)	-16685	Dead	WITH TUMOR	#N/A	861	Cervical Cancer	Distant Metastasis	Head & Neck	#N/A	652	Complete Remission/Response	#N/A	#N/A	1	861	1	861	1	652	1	652
	TCGA-DS-A1OA	CESC	77	FEMALE	ASIAN	[Not Available]	Stage IB	Cervical Squamous Cell Carcinoma	G3	2001	Post (prior bilateral ovariectomy OR >12 mo since LMP with no prior hysterectomy)	-28160	Dead	WITH TUMOR	879	879	Cervical Cancer	Locoregional Recurrence	#N/A	#N/A	379	[Not Available]	#N/A	#N/A	1	879	1	879	#N/A	#N/A	1	379
	TCGA-DS-A1O9	CESC	75	FEMALE	WHITE	[Not Available]	Stage IVA	Cervical Squamous Cell Carcinoma	G3	1999	Post (prior bilateral ovariectomy OR >12 mo since LMP with no prior hysterectomy)	-27433	Dead	WITH TUMOR	266	266	Cervical Cancer	#N/A	#N/A	#N/A	#N/A	[Not Available]	#N/A	#N/A	1	266	1	266	#N/A	#N/A	1	266
	TCGA-DS-A0VN	CESC	47	FEMALE	WHITE	[Not Available]	Stage IB	Cervical Squamous Cell Carcinoma	G2	2002	Pre (<6 months since LMP AND no prior bilateral ovariectomy AND not on estrogen replacement)	-17433	Alive	TUMOR FREE	3609	#N/A	#N/A	#N/A	#N/A	#N/A	#N/A	Complete Remission/Response	#N/A	#N/A	0	3609	0	3609	0	3609	0	3609
	TCGA-DS-A0VM	CESC	51	FEMALE	WHITE	[Not Available]	Stage IB	Cervical Squamous Cell Carcinoma	G3	2003	Post (prior bilateral ovariectomy OR >12 mo since LMP with no prior hysterectomy)	-18839	Alive	TUMOR FREE	3589	#N/A	#N/A	Distant Metastasis	Lung	#N/A	868	Complete Remission/Response	#N/A	#N/A	0	3589	0	3589	1	868	1	868
	TCGA-DS-A0VL	CESC	25	FEMALE	WHITE	[Not Available]	Stage IB	Cervical Squamous Cell Carcinoma	G2	2001	Pre (<6 months since LMP AND no prior bilateral ovariectomy AND not on estrogen replacement)	-9186	Alive	TUMOR FREE	81	#N/A	#N/A	#N/A	#N/A	#N/A	#N/A	Complete Remission/Response	#N/A	#N/A	0	81	0	81	0	81	0	81
	TCGA-DS-A0VK	CESC	45	FEMALE	WHITE	[Not Available]	Stage IB	Cervical Squamous Cell Carcinoma	G3	1996	Pre (<6 months since LMP AND no prior bilateral ovariectomy AND not on estrogen replacement)	-16792	Dead	WITH TUMOR	#N/A	1118	#N/A	Distant Metastasis	Other, specify	Vagina	209	Progressive Disease	#N/A	#N/A	1	1118	1	1118	#N/A	#N/A	1	209
	TCGA-DR-A0ZM	CESC	61	FEMALE	WHITE	[Not Available]	Stage IIIB	Cervical Squamous Cell Carcinoma	G2	2006	Post (prior bilateral ovariectomy OR >12 mo since LMP with no prior hysterectomy)	-22464	Alive	TUMOR FREE	1791	#N/A	#N/A	#N/A	#N/A	#N/A	#N/A	Complete Remission/Response	#N/A	#N/A	0	1791	0	1791	0	1791	0	1791
	TCGA-DR-A0ZL	CESC	53	FEMALE	ASIAN	[Not Available]	Stage IB	Cervical Squamous Cell Carcinoma	G3	2004	Post (prior bilateral ovariectomy OR >12 mo since LMP with no prior hysterectomy)	-19384	Alive	TUMOR FREE	2669	#N/A	#N/A	#N/A	#N/A	#N/A	#N/A	Complete Remission/Response	#N/A	#N/A	0	2669	0	2669	0	2669	0	2669
	TCGA-DG-A2KM	CESC	46	FEMALE	[Not Evaluated]	[Not Available]	Stage IB1	Cervical Squamous Cell Carcinoma	G2	2008	[Unknown]	-16808	Alive	TUMOR FREE	1946	#N/A	#N/A	#N/A	#N/A	#N/A	#N/A	Complete Remission/Response	#N/A	#N/A	0	1946	0	1946	0	1946	0	1946
	TCGA-DG-A2KL	CESC	53	FEMALE	[Not Evaluated]	[Not Available]	Stage IIA	Cervical Squamous Cell Carcinoma	G1	#N/A	Post (prior bilateral ovariectomy OR >12 mo since LMP with no prior hysterectomy)	-19539	Alive	TUMOR FREE	1367	#N/A	#N/A	#N/A	#N/A	#N/A	#N/A	Complete Remission/Response	#N/A	#N/A	0	1367	0	1367	0	1367	0	1367
	TCGA-DG-A2KK	CESC	51	FEMALE	[Not Evaluated]	[Not Available]	Stage IIIB	Cervical Squamous Cell Carcinoma	G3	2007	Post (prior bilateral ovariectomy OR >12 mo since LMP with no prior hysterectomy)	-18834	Alive	TUMOR FREE	2496	#N/A	#N/A	#N/A	#N/A	#N/A	#N/A	Complete Remission/Response	#N/A	#N/A	0	2496	0	2496	0	2496	0	2496
	TCGA-DG-A2KJ	CESC	50	FEMALE	[Not Evaluated]	[Not Available]	Stage IIIB	Cervical Squamous Cell Carcinoma	G3	2006	[Unknown]	-18453	Alive	TUMOR FREE	2893	#N/A	#N/A	#N/A	#N/A	#N/A	#N/A	Complete Remission/Response	#N/A	#N/A	0	2893	0	2893	0	2893	0	2893
	TCGA-C5-A907	CESC	47	FEMALE	WHITE	[Not Available]	Stage IB2	Cervical Squamous Cell Carcinoma	G2	2013	[Not Available]	-17304	Alive	TUMOR FREE	448	#N/A	#N/A	#N/A	#N/A	#N/A	#N/A	[Not Available]	#N/A	#N/A	0	448	0	448	#N/A	#N/A	0	448
	TCGA-C5-A905	CESC	37	FEMALE	BLACK OR AFRICAN AMERICAN	[Not Available]	Stage IB	Cervical Squamous Cell Carcinoma	G2	1994	[Not Available]	-13584	Alive	TUMOR FREE	4879	#N/A	#N/A	#N/A	#N/A	#N/A	#N/A	[Not Available]	#N/A	#N/A	0	4879	0	4879	#N/A	#N/A	0	4879
	TCGA-C5-A902	CESC	35	FEMALE	BLACK OR AFRICAN AMERICAN	[Not Available]	Stage IB2	Cervical Squamous Cell Carcinoma	G3	2008	[Not Available]	-12959	Alive	TUMOR FREE	149	#N/A	#N/A	#N/A	#N/A	#N/A	#N/A	[Not Available]	#N/A	#N/A	0	149	0	149	#N/A	#N/A	0	149
	TCGA-C5-A901	CESC	44	FEMALE	WHITE	[Not Available]	[Not Available]	Cervical Squamous Cell Carcinoma	G2	2000	[Not Available]	-16186	Alive	TUMOR FREE	518	#N/A	#N/A	#N/A	#N/A	#N/A	#N/A	[Not Available]	#N/A	#N/A	0	518	0	518	#N/A	#N/A	0	518
	TCGA-C5-A8ZZ	CESC	41	FEMALE	WHITE	[Not Available]	Stage IIB	Cervical Squamous Cell Carcinoma	G2	2005	Pre (<6 months since LMP AND no prior bilateral ovariectomy AND not on estrogen replacement)	-15262	Alive	TUMOR FREE	636	#N/A	#N/A	#N/A	#N/A	#N/A	#N/A	[Not Available]	#N/A	#N/A	0	636	0	636	#N/A	#N/A	0	636
	TCGA-C5-A8YT	CESC	36	FEMALE	WHITE	[Not Available]	Stage IB1	Cervical Squamous Cell Carcinoma	G3	2008	[Not Available]	-13253	Dead	WITH TUMOR	#N/A	633	#N/A	#N/A	#N/A	#N/A	#N/A	[Not Available]	#N/A	#N/A	1	633	1	633	#N/A	#N/A	1	633
	TCGA-C5-A8YR	CESC	56	FEMALE	WHITE	[Not Available]	Stage IB	Cervical Squamous Cell Carcinoma	G3	1994	[Not Available]	-20672	Dead	#N/A	#N/A	837	#N/A	Locoregional Recurrence	#N/A	regional recurrence NOS	272	[Not Available]	#N/A	#N/A	1	837	#N/A	837	#N/A	#N/A	1	272
	TCGA-C5-A8YQ	CESC	79	FEMALE	WHITE	[Not Available]	Stage IB1	Cervical Squamous Cell Carcinoma	G2	2006	Post (prior bilateral ovariectomy OR >12 mo since LMP with no prior hysterectomy)	-28873	Dead	WITH TUMOR	#N/A	715	Cervical Cancer	#N/A	#N/A	#N/A	#N/A	[Not Available]	#N/A	#N/A	1	715	1	715	#N/A	#N/A	1	715
	TCGA-C5-A8XK	CESC	30	FEMALE	BLACK OR AFRICAN AMERICAN	[Not Available]	[Not Available]	Cervical Squamous Cell Carcinoma	G3	2000	[Not Available]	-11268	Alive	TUMOR FREE	3039	#N/A	#N/A	#N/A	#N/A	#N/A	#N/A	[Not Available]	#N/A	#N/A	0	3039	0	3039	#N/A	#N/A	0	3039
	TCGA-C5-A8XJ	CESC	74	FEMALE	WHITE	[Not Available]	Stage IB	Cervical Squamous Cell Carcinoma	[Not Available]	2002	[Not Available]	-27087	Alive	TUMOR FREE	4467	#N/A	#N/A	#N/A	#N/A	#N/A	#N/A	[Not Available]	#N/A	#N/A	0	4467	0	4467	#N/A	#N/A	0	4467
	TCGA-C5-A8XI	CESC	69	FEMALE	BLACK OR AFRICAN AMERICAN	[Not Available]	Stage IB2	Cervical Squamous Cell Carcinoma	G3	2008	Post (prior bilateral ovariectomy OR >12 mo since LMP with no prior hysterectomy)	-25220	Alive	TUMOR FREE	254	#N/A	#N/A	#N/A	#N/A	#N/A	#N/A	[Not Available]	#N/A	#N/A	0	254	0	254	#N/A	#N/A	0	254
	TCGA-C5-A8XH	CESC	39	FEMALE	WHITE	[Not Available]	Stage IB1	Cervical Squamous Cell Carcinoma	[Not Available]	2007	[Not Available]	-14444	Dead	TUMOR FREE	#N/A	1394	#N/A	#N/A	#N/A	#N/A	#N/A	[Not Available]	#N/A	#N/A	1	1394	0	1394	#N/A	#N/A	0	1394
	TCGA-C5-A7XC	CESC	26	FEMALE	WHITE	[Not Available]	Stage IB1	Cervical Squamous Cell Carcinoma	G2	2004	[Not Available]	-9776	Alive	TUMOR FREE	1551	#N/A	#N/A	#N/A	#N/A	#N/A	#N/A	[Not Available]	#N/A	#N/A	0	1551	0	1551	#N/A	#N/A	0	1551
	TCGA-C5-A7X8	CESC	35	FEMALE	WHITE	[Not Available]	Stage IB1	Mucinous Adenocarcinoma of Endocervical Type	G2	2003	[Not Available]	-12977	Alive	TUMOR FREE	83	#N/A	#N/A	#N/A	#N/A	#N/A	#N/A	[Not Available]	#N/A	#N/A	0	83	0	83	#N/A	#N/A	0	83
	TCGA-C5-A7X5	CESC	72	FEMALE	BLACK OR AFRICAN AMERICAN	[Not Available]	Stage IVB	Cervical Squamous Cell Carcinoma	G3	2003	[Not Available]	-26542	Dead	WITH TUMOR	#N/A	414	Cervical Cancer	#N/A	#N/A	#N/A	#N/A	[Not Available]	#N/A	#N/A	1	414	1	414	#N/A	#N/A	1	414
	TCGA-C5-A7X3	CESC	70	FEMALE	WHITE	[Not Available]	Stage IIIB	Cervical Squamous Cell Carcinoma	G2	1997	[Not Available]	-25665	Dead	TUMOR FREE	#N/A	284	#N/A	#N/A	#N/A	#N/A	#N/A	[Not Available]	#N/A	#N/A	1	284	0	284	#N/A	#N/A	0	284
	TCGA-C5-A7UI	CESC	42	FEMALE	BLACK OR AFRICAN AMERICAN	[Not Available]	Stage IB1	Cervical Squamous Cell Carcinoma	G3	2004	[Not Available]	-15349	Dead	TUMOR FREE	#N/A	2888	#N/A	#N/A	#N/A	#N/A	#N/A	[Not Available]	#N/A	#N/A	1	2888	0	2888	#N/A	#N/A	0	2888
	TCGA-C5-A7UH	CESC	55	FEMALE	WHITE	[Not Available]	Stage IIIB	Cervical Squamous Cell Carcinoma	G3	2003	[Not Available]	-20189	Alive	TUMOR FREE	3988	#N/A	#N/A	#N/A	#N/A	#N/A	#N/A	[Not Available]	#N/A	#N/A	0	3988	0	3988	#N/A	#N/A	0	3988
	TCGA-C5-A7UE	CESC	45	FEMALE	WHITE	[Not Available]	Stage IB1	Cervical Squamous Cell Carcinoma	G2	2001	[Not Available]	-16473	Alive	TUMOR FREE	4738	#N/A	#N/A	#N/A	#N/A	#N/A	#N/A	Complete Remission/Response	#N/A	#N/A	0	4738	0	4738	0	4738	0	4738
	TCGA-C5-A7UC	CESC	48	FEMALE	WHITE	[Not Available]	Stage IB	Cervical Squamous Cell Carcinoma	G3	2002	[Not Available]	-17765	Dead	TUMOR FREE	#N/A	523	#N/A	#N/A	#N/A	#N/A	#N/A	[Not Available]	#N/A	#N/A	1	523	0	523	#N/A	#N/A	0	523
	TCGA-C5-A7CO	CESC	68	FEMALE	WHITE	[Not Available]	Stage IB2	Cervical Squamous Cell Carcinoma	G2	2002	Post (prior bilateral ovariectomy OR >12 mo since LMP with no prior hysterectomy)	-25045	Alive	TUMOR FREE	4482	#N/A	#N/A	#N/A	#N/A	#N/A	#N/A	Complete Remission/Response	#N/A	#N/A	0	4482	0	4482	0	4482	0	4482
	TCGA-C5-A7CM	CESC	35	FEMALE	WHITE	[Not Available]	Stage IB2	Endocervical Adenocarcinoma of the Usual Type	G2	2012	[Not Available]	-12853	Alive	TUMOR FREE	619	#N/A	#N/A	#N/A	#N/A	#N/A	#N/A	Complete Remission/Response	#N/A	#N/A	0	619	0	619	0	619	0	619
	TCGA-C5-A7CL	CESC	48	FEMALE	WHITE	[Not Available]	Stage IIIB	Cervical Squamous Cell Carcinoma	G2	2002	[Not Available]	-17869	Dead	WITH TUMOR	#N/A	471	Cervical Cancer	#N/A	#N/A	#N/A	#N/A	[Not Available]	#N/A	#N/A	1	471	1	471	#N/A	#N/A	1	471
	TCGA-C5-A7CK	CESC	58	FEMALE	WHITE	[Not Available]	Stage IVA	Cervical Squamous Cell Carcinoma	G2	2001	[Not Available]	-21520	Dead	TUMOR FREE	#N/A	4086	#N/A	#N/A	#N/A	#N/A	#N/A	[Not Available]	#N/A	#N/A	1	4086	0	4086	#N/A	#N/A	0	4086
	TCGA-C5-A7CJ	CESC	42	FEMALE	WHITE	[Not Available]	Stage IIA	Cervical Squamous Cell Carcinoma	G2	2002	[Not Available]	-15652	Dead	TUMOR FREE	#N/A	3097	#N/A	#N/A	#N/A	#N/A	#N/A	[Not Available]	#N/A	#N/A	1	3097	0	3097	#N/A	#N/A	0	3097
	TCGA-C5-A7CH	CESC	43	FEMALE	WHITE	[Not Available]	Stage IIB	Cervical Squamous Cell Carcinoma	G2	2001	[Not Available]	-15777	Alive	TUMOR FREE	4694	#N/A	#N/A	#N/A	#N/A	#N/A	#N/A	[Not Available]	#N/A	#N/A	0	4694	0	4694	#N/A	#N/A	0	4694
	TCGA-C5-A7CG	CESC	55	FEMALE	WHITE	[Not Available]	Stage IB	Cervical Squamous Cell Carcinoma	G2	1997	[Not Available]	-20242	Alive	TUMOR FREE	6408	#N/A	#N/A	#N/A	#N/A	#N/A	#N/A	[Not Available]	#N/A	#N/A	0	6408	0	6408	#N/A	#N/A	0	6408
	TCGA-C5-A3HL	CESC	76	FEMALE	WHITE	[Not Available]	Stage IB2	Cervical Squamous Cell Carcinoma	G2	2007	Post (prior bilateral ovariectomy OR >12 mo since LMP with no prior hysterectomy)	-27963	Alive	TUMOR FREE	621	#N/A	#N/A	#N/A	#N/A	#N/A	#N/A	Complete Remission/Response	#N/A	#N/A	0	621	0	621	0	621	0	621
	TCGA-C5-A3HF	CESC	24	FEMALE	WHITE	[Not Available]	Stage IB2	Mucinous Adenocarcinoma of Endocervical Type	G2	1996	Pre (<6 months since LMP AND no prior bilateral ovariectomy AND not on estrogen replacement)	-9115	Dead	WITH TUMOR	#N/A	543	Cervical Cancer	Distant Metastasis	Other, specify	Pelvis	450	[Not Available]	#N/A	#N/A	1	543	1	543	#N/A	#N/A	1	450
	TCGA-C5-A3HE	CESC	44	FEMALE	WHITE	[Not Available]	Stage IB2	Cervical Squamous Cell Carcinoma	G3	2006	[Not Available]	-16139	Alive	#N/A	548	#N/A	#N/A	Locoregional Recurrence	Cervix	#N/A	252	[Not Available]	#N/A	#N/A	0	548	0	548	#N/A	#N/A	1	252
	TCGA-C5-A3HD	CESC	51	FEMALE	WHITE	[Not Available]	Stage IIB	Cervical Squamous Cell Carcinoma	G2	2004	[Not Available]	-18690	Alive	TUMOR FREE	1582	#N/A	#N/A	#N/A	#N/A	#N/A	#N/A	Complete Remission/Response	#N/A	#N/A	0	1582	0	1582	0	1582	0	1582
	TCGA-C5-A2M2	CESC	56	FEMALE	WHITE	[Not Available]	Stage IB2	Endocervical Type of Adenocarcinoma	G2	2009	Post (prior bilateral ovariectomy OR >12 mo since LMP with no prior hysterectomy)	-20480	Dead	#N/A	#N/A	1011	#N/A	#N/A	#N/A	#N/A	#N/A	[Not Available]	#N/A	#N/A	1	1011	#N/A	1011	#N/A	#N/A	0	1011
	TCGA-C5-A2M1	CESC	37	FEMALE	WHITE	[Not Available]	Stage IB1	Endocervical Type of Adenocarcinoma	G2	2005	Pre (<6 months since LMP AND no prior bilateral ovariectomy AND not on estrogen replacement)	-13835	Alive	TUMOR FREE	1169	#N/A	#N/A	#N/A	#N/A	#N/A	#N/A	Complete Remission/Response	#N/A	#N/A	0	1169	0	1169	0	1169	0	1169
	TCGA-C5-A2LZ	CESC	65	FEMALE	WHITE	[Not Available]	Stage IIIB	Cervical Squamous Cell Carcinoma	G2	1998	Post (prior bilateral ovariectomy OR >12 mo since LMP with no prior hysterectomy)	-24059	Dead	WITH TUMOR	#N/A	3046	Cervical Cancer	Distant Metastasis	#N/A	#N/A	2893	Complete Remission/Response	#N/A	#N/A	1	3046	1	3046	1	2893	1	2893
	TCGA-C5-A2LY	CESC	30	FEMALE	WHITE	[Not Available]	Stage IB1	Cervical Squamous Cell Carcinoma	G2	2002	Pre (<6 months since LMP AND no prior bilateral ovariectomy AND not on estrogen replacement)	-11018	Alive	TUMOR FREE	2383	#N/A	#N/A	#N/A	#N/A	#N/A	#N/A	Complete Remission/Response	#N/A	#N/A	0	2383	0	2383	0	2383	0	2383
	TCGA-C5-A2LX	CESC	54	FEMALE	WHITE	[Not Available]	Stage IB1	Cervical Squamous Cell Carcinoma	G2	2007	Post (prior bilateral ovariectomy OR >12 mo since LMP with no prior hysterectomy)	-20070	Alive	TUMOR FREE	2526	#N/A	#N/A	#N/A	#N/A	#N/A	#N/A	Complete Remission/Response	#N/A	#N/A	0	2526	0	2526	0	2526	0	2526
	TCGA-C5-A2LV	CESC	36	FEMALE	BLACK OR AFRICAN AMERICAN	[Not Available]	Stage IB	Cervical Squamous Cell Carcinoma	G3	2003	Pre (<6 months since LMP AND no prior bilateral ovariectomy AND not on estrogen replacement)	-13447	Alive	TUMOR FREE	2234	#N/A	#N/A	#N/A	#N/A	#N/A	#N/A	Complete Remission/Response	#N/A	#N/A	0	2234	0	2234	0	2234	0	2234
	TCGA-C5-A2LT	CESC	38	FEMALE	WHITE	[Not Available]	Stage IB	Cervical Squamous Cell Carcinoma	G3	2001	Pre (<6 months since LMP AND no prior bilateral ovariectomy AND not on estrogen replacement)	-13966	Alive	TUMOR FREE	2226	#N/A	#N/A	#N/A	#N/A	#N/A	#N/A	Complete Remission/Response	#N/A	#N/A	0	2226	0	2226	0	2226	0	2226
	TCGA-C5-A2LS	CESC	37	FEMALE	WHITE	[Not Available]	Stage IB2	Endocervical Adenocarcinoma of the Usual Type	G1	2005	[Not Available]	-13857	Alive	TUMOR FREE	1345	#N/A	#N/A	#N/A	#N/A	#N/A	#N/A	Complete Remission/Response	#N/A	#N/A	0	1345	0	1345	0	1345	0	1345
	TCGA-C5-A1MQ	CESC	35	FEMALE	WHITE	[Not Available]	Stage IIA	Cervical Squamous Cell Carcinoma	G2	2009	[Not Available]	-12836	Alive	TUMOR FREE	1031	#N/A	#N/A	#N/A	#N/A	#N/A	#N/A	Complete Remission/Response	#N/A	#N/A	0	1031	0	1031	0	1031	0	1031
	TCGA-C5-A1MP	CESC	34	FEMALE	BLACK OR AFRICAN AMERICAN	[Not Available]	Stage IB2	Cervical Squamous Cell Carcinoma	G3	2009	Pre (<6 months since LMP AND no prior bilateral ovariectomy AND not on estrogen replacement)	-12692	Alive	TUMOR FREE	109	#N/A	#N/A	#N/A	#N/A	#N/A	#N/A	Complete Remission/Response	#N/A	#N/A	0	109	0	109	0	109	0	109
	TCGA-C5-A1MN	CESC	42	FEMALE	WHITE	[Not Available]	Stage IIIB	Cervical Squamous Cell Carcinoma	G2	2007	Pre (<6 months since LMP AND no prior bilateral ovariectomy AND not on estrogen replacement)	-15499	Dead	TUMOR FREE	#N/A	1245	#N/A	#N/A	#N/A	#N/A	#N/A	Complete Remission/Response	#N/A	#N/A	1	1245	0	1245	0	1245	0	1245
	TCGA-C5-A1ML	CESC	49	FEMALE	WHITE	[Not Available]	Stage IB2	Cervical Squamous Cell Carcinoma	G3	2005	Post (prior bilateral ovariectomy OR >12 mo since LMP with no prior hysterectomy)	-18067	Dead	WITH TUMOR	#N/A	636	Cervical Cancer	#N/A	#N/A	#N/A	#N/A	Progressive Disease	#N/A	#N/A	1	636	1	636	#N/A	#N/A	1	636
	TCGA-C5-A1MK	CESC	79	FEMALE	WHITE	[Not Available]	Stage IIIB	Cervical Squamous Cell Carcinoma	G3	2005	Post (prior bilateral ovariectomy OR >12 mo since LMP with no prior hysterectomy)	-28939	Dead	WITH TUMOR	#N/A	74	Cervical Cancer	#N/A	#N/A	#N/A	#N/A	Progressive Disease	#N/A	#N/A	1	74	1	74	#N/A	#N/A	1	74
	TCGA-C5-A1MJ	CESC	61	FEMALE	WHITE	[Not Available]	Stage IB1	Endocervical Type of Adenocarcinoma	G2	2005	Post (prior bilateral ovariectomy OR >12 mo since LMP with no prior hysterectomy)	-22308	Dead	TUMOR FREE	#N/A	14	#N/A	#N/A	#N/A	#N/A	#N/A	[Not Available]	#N/A	#N/A	1	14	0	14	#N/A	#N/A	0	14
	TCGA-C5-A1MI	CESC	50	FEMALE	WHITE	[Not Available]	Stage IB1	Cervical Squamous Cell Carcinoma	G2	2004	Peri (6-12 months since last menstrual period)	-18336	Dead	WITH TUMOR	#N/A	1083	Cervical Cancer	Distant Metastasis	Other, specify	distant recurrence multiple sites	805	Complete Remission/Response	#N/A	#N/A	1	1083	1	1083	1	805	1	805
	TCGA-C5-A1MH	CESC	71	FEMALE	WHITE	[Not Available]	Stage IIIB	Cervical Squamous Cell Carcinoma	G3	2004	Post (prior bilateral ovariectomy OR >12 mo since LMP with no prior hysterectomy)	-26234	Dead	WITH TUMOR	#N/A	1186	Cervical Cancer	Distant Metastasis	Lung	#N/A	178	Complete Remission/Response	#N/A	#N/A	1	1186	1	1186	1	178	1	178
	TCGA-C5-A1MF	CESC	49	FEMALE	WHITE	[Not Available]	Stage IB2	Cervical Squamous Cell Carcinoma	G2	2004	Pre (<6 months since LMP AND no prior bilateral ovariectomy AND not on estrogen replacement)	-17911	Alive	TUMOR FREE	1617	#N/A	#N/A	#N/A	#N/A	#N/A	#N/A	Complete Remission/Response	#N/A	#N/A	0	1617	0	1617	0	1617	0	1617
	TCGA-C5-A1ME	CESC	40	FEMALE	WHITE	[Not Available]	Stage IB1	Endocervical Type of Adenocarcinoma	G1	2003	Pre (<6 months since LMP AND no prior bilateral ovariectomy AND not on estrogen replacement)	-14970	Alive	TUMOR FREE	1756	#N/A	#N/A	#N/A	#N/A	#N/A	#N/A	Complete Remission/Response	#N/A	#N/A	0	1756	0	1756	0	1756	0	1756
	TCGA-C5-A1M9	CESC	46	FEMALE	WHITE	[Not Available]	Stage IB1	Endocervical Type of Adenocarcinoma	G3	2002	Pre (<6 months since LMP AND no prior bilateral ovariectomy AND not on estrogen replacement)	-17020	Dead	WITH TUMOR	#N/A	1065	Cervical Cancer	Distant Metastasis	Lung	#N/A	555	Complete Remission/Response	#N/A	#N/A	1	1065	1	1065	1	555	1	555
	TCGA-C5-A1M8	CESC	43	FEMALE	WHITE	[Not Available]	Stage IB1	Cervical Squamous Cell Carcinoma	G2	2001	Indeterminate (neither Pre or Postmenopausal)	-15848	Alive	TUMOR FREE	919	#N/A	#N/A	#N/A	#N/A	#N/A	#N/A	Complete Remission/Response	#N/A	#N/A	0	919	0	919	0	919	0	919
	TCGA-C5-A1M7	CESC	37	FEMALE	WHITE	[Not Available]	Stage IB	Cervical Squamous Cell Carcinoma	G2	1999	Pre (<6 months since LMP AND no prior bilateral ovariectomy AND not on estrogen replacement)	-13808	Alive	TUMOR FREE	1409	#N/A	#N/A	#N/A	#N/A	#N/A	#N/A	Complete Remission/Response	#N/A	#N/A	0	1409	0	1409	0	1409	0	1409
	TCGA-C5-A1M6	CESC	55	FEMALE	WHITE	[Not Available]	Stage IIB	Cervical Squamous Cell Carcinoma	G3	1998	Post (prior bilateral ovariectomy OR >12 mo since LMP with no prior hysterectomy)	-20090	Dead	WITH TUMOR	#N/A	955	Cervical Cancer	Distant Metastasis	Lung	#N/A	316	Complete Remission/Response	#N/A	#N/A	1	955	1	955	1	316	1	316
	TCGA-C5-A1M5	CESC	53	FEMALE	WHITE	[Not Available]	Stage IB	Cervical Squamous Cell Carcinoma	G2	1996	Indeterminate (neither Pre or Postmenopausal)	-19672	Dead	WITH TUMOR	#N/A	2052	Cervical Cancer	Distant Metastasis	Other, specify	Regional recurrence NOS	693	Complete Remission/Response	#N/A	#N/A	1	2052	1	2052	1	693	1	693
	TCGA-C5-A1BQ	CESC	65	FEMALE	WHITE	[Not Available]	Stage IIIB	Cervical Squamous Cell Carcinoma	G2	2002	Post (prior bilateral ovariectomy OR >12 mo since LMP with no prior hysterectomy)	-24018	Dead	TUMOR FREE	#N/A	604	Cervical Cancer	#N/A	#N/A	#N/A	#N/A	Partial Remission/Response	#N/A	#N/A	1	604	1	604	#N/A	#N/A	0	604
	TCGA-C5-A1BN	CESC	26	FEMALE	WHITE	[Not Available]	Stage IB2	Cervical Squamous Cell Carcinoma	G3	2007	Pre (<6 months since LMP AND no prior bilateral ovariectomy AND not on estrogen replacement)	-9783	Dead	WITH TUMOR	#N/A	166	Cervical Cancer	#N/A	#N/A	#N/A	#N/A	Progressive Disease	#N/A	#N/A	1	166	1	166	#N/A	#N/A	1	166
	TCGA-C5-A1BM	CESC	78	FEMALE	BLACK OR AFRICAN AMERICAN	[Not Available]	Stage IB	Cervical Squamous Cell Carcinoma	G2	1997	Post (prior bilateral ovariectomy OR >12 mo since LMP with no prior hysterectomy)	-28815	Dead	TUMOR FREE	#N/A	2520	#N/A	#N/A	#N/A	#N/A	#N/A	Complete Remission/Response	#N/A	#N/A	1	2520	0	2520	0	2520	0	2520
	TCGA-C5-A1BL	CESC	32	FEMALE	WHITE	[Not Available]	Stage IB	Cervical Squamous Cell Carcinoma	G2	1994	Pre (<6 months since LMP AND no prior bilateral ovariectomy AND not on estrogen replacement)	-11723	Alive	TUMOR FREE	5271	#N/A	#N/A	#N/A	#N/A	#N/A	#N/A	Complete Remission/Response	#N/A	#N/A	0	5271	0	5271	0	5271	0	5271
	TCGA-C5-A1BK	CESC	36	FEMALE	BLACK OR AFRICAN AMERICAN	[Not Available]	Stage IB	Cervical Squamous Cell Carcinoma	G2	1994	Pre (<6 months since LMP AND no prior bilateral ovariectomy AND not on estrogen replacement)	-13297	Alive	TUMOR FREE	5385	#N/A	#N/A	#N/A	#N/A	#N/A	#N/A	Complete Remission/Response	#N/A	#N/A	0	5385	0	5385	0	5385	0	5385
	TCGA-C5-A1BJ	CESC	34	FEMALE	WHITE	[Not Available]	Stage IIB	Cervical Squamous Cell Carcinoma	G2	1997	Pre (<6 months since LMP AND no prior bilateral ovariectomy AND not on estrogen replacement)	-12611	Alive	TUMOR FREE	4385	#N/A	#N/A	#N/A	#N/A	#N/A	#N/A	Complete Remission/Response	#N/A	#N/A	0	4385	0	4385	0	4385	0	4385
	TCGA-C5-A1BI	CESC	31	FEMALE	WHITE	[Not Available]	Stage IIIB	Cervical Squamous Cell Carcinoma	G2	2001	Pre (<6 months since LMP AND no prior bilateral ovariectomy AND not on estrogen replacement)	-11564	Alive	TUMOR FREE	1112	#N/A	#N/A	#N/A	#N/A	#N/A	#N/A	Complete Remission/Response	#N/A	#N/A	0	1112	0	1112	0	1112	0	1112
	TCGA-C5-A1BF	CESC	46	FEMALE	WHITE	[Not Available]	Stage IB	Cervical Squamous Cell Carcinoma	G1	1997	[Not Available]	-16975	Dead	WITH TUMOR	#N/A	570	Cervical Cancer	Distant Metastasis	Other, specify	Lung, Sternum	93	Complete Remission/Response	#N/A	#N/A	1	570	1	570	1	93	1	93
	TCGA-C5-A1BE	CESC	64	FEMALE	WHITE	[Not Available]	Stage IB2	Cervical Squamous Cell Carcinoma	G2	2000	Post (prior bilateral ovariectomy OR >12 mo since LMP with no prior hysterectomy)	-23727	Dead	WITH TUMOR	#N/A	2094	Cervical Cancer	#N/A	#N/A	#N/A	1674	Complete Remission/Response	#N/A	#N/A	1	2094	1	2094	1	1674	1	1674
	TCGA-C5-A0TN	CESC	21	FEMALE	BLACK OR AFRICAN AMERICAN	[Not Available]	Stage IB2	Cervical Squamous Cell Carcinoma	G3	1997	Pre (<6 months since LMP AND no prior bilateral ovariectomy AND not on estrogen replacement)	-7760	Dead	WITH TUMOR	#N/A	348	Cervical Cancer	Distant Metastasis	Other, specify	Pelvis/Liver	62	Progressive Disease	#N/A	#N/A	1	348	1	348	#N/A	#N/A	1	62
	TCGA-BI-A20A	CESC	49	FEMALE	WHITE	[Not Available]	Stage IB1	Cervical Squamous Cell Carcinoma	G3	2010	[Not Available]	-18215	Alive	TUMOR FREE	720	#N/A	#N/A	#N/A	#N/A	#N/A	#N/A	Complete Remission/Response	#N/A	#N/A	0	720	0	720	0	720	0	720
	TCGA-BI-A0VS	CESC	48	FEMALE	WHITE	[Not Available]	Stage IB	Cervical Squamous Cell Carcinoma	G3	2007	Pre (<6 months since LMP AND no prior bilateral ovariectomy AND not on estrogen replacement)	-17839	Alive	TUMOR FREE	1735	#N/A	#N/A	#N/A	#N/A	#N/A	#N/A	Complete Remission/Response	#N/A	#N/A	0	1735	0	1735	0	1735	0	1735
	TCGA-BI-A0VR	CESC	53	FEMALE	WHITE	[Not Available]	Stage IIIB	Cervical Squamous Cell Carcinoma	G3	2006	Post (prior bilateral ovariectomy OR >12 mo since LMP with no prior hysterectomy)	-19473	Alive	TUMOR FREE	1505	#N/A	#N/A	#N/A	#N/A	#N/A	#N/A	[Not Available]	#N/A	#N/A	0	1505	0	1505	#N/A	#N/A	0	1505
	TCGA-4J-AA1J	CESC	31	FEMALE	WHITE	[Not Available]	Stage IB2	Cervical Squamous Cell Carcinoma	G3	2013	Pre (<6 months since LMP AND no prior bilateral ovariectomy AND not on estrogen replacement)	-11611	Alive	TUMOR FREE	542	#N/A	#N/A	#N/A	#N/A	#N/A	#N/A	Complete Remission/Response	#N/A	#N/A	0	542	0	542	0	542	0	542
