# Supplementary material for: Immune landscape and heterogeneity of cervical squamous cell carcinoma and adenocarcinoma
Source: Aging (Albany NY). 2024 Jan 10;16(1):568–92. doi: 10.18632/aging.205397 (PMC10817369; doi:10.18632/aging.205397)
Supplement: Supplementary Table 3 [file aging-16-205397-s004.xlsx]

## Sheet: Sheet1
	Supplementary Table 3. DEGs between CSCC and ADC
	Genesymbol	log2fc	pvalue	p-adj
	ZSCAN18	-1.26331	3.53881e-06	2.03282e-05
	ZSCAN1	-1.4868	9.57823e-08	7.32848e-07
	ZPLD2P	-1.52641	1.79427e-06	1.09137e-05
	ZP4	1.32903	0.00146064	0.00468122
	ZNRF2P2	-1.15366	1.06756e-06	6.77136e-06
	ZNF91	-1.107	3.9132e-05	0.000182051
	ZNF90	-1.07513	0.00174725	0.00549289
	ZNF888	-1.12086	3.8488e-06	2.19617e-05
	ZNF860	-1.2937	5.75824e-11	7.25693e-10
	ZNF844	-1.23778	2.16691e-06	1.3014e-05
	ZNF835	-1.15626	1.17858e-05	6.10666e-05
	ZNF826P	-2.3922	4.68375e-16	1.09864e-14
	ZNF816	-1.03796	4.33855e-07	2.9401e-06
	ZNF812P	1.82886	1.9564e-22	9.095e-21
	ZNF774	-1.14195	1.45249e-16	3.58371e-15
	ZNF750	3.08871	3.3038e-38	5.60904e-36
	ZNF737	-1.36149	2.30858e-06	1.37768e-05
	ZNF730	-1.37012	0.000651202	0.00228692
	ZNF727	-2.01591	0.000100117	0.000425075
	ZNF709	-1.00851	1.38217e-09	1.42297e-08
	ZNF702P	-1.79031	7.46088e-09	6.85096e-08
	ZNF69	-2.71606	1.58484e-27	1.17684e-25
	ZNF683	1.30408	2.41923e-07	1.72369e-06
	ZNF681	-1.26805	0.000111558	0.000468389
	ZNF667-AS1	-1.15181	0.000364269	0.00135786
	ZNF667	-1.09982	0.0012783	0.00415944
	ZNF663P	-1.64475	7.30325e-05	0.000320496
	ZNF662	-1.54532	4.27474e-08	3.47855e-07
	ZNF660	-1.3248	1.15629e-09	1.20798e-08
	ZNF66	-1.51809	7.01813e-06	3.80517e-05
	ZNF648	-1.1779	0.000380055	0.0014108
	ZNF620	-1.39289	1.11868e-21	4.82786e-20
	ZNF610	-1.91173	1.16491e-12	1.8422e-11
	ZNF608	-2.03245	9.34169e-11	1.14875e-09
	ZNF583	-1.06016	7.15787e-06	3.87059e-05
	ZNF542P	-1.51641	5.85879e-09	5.45128e-08
	ZNF536	-1.93332	2.43622e-05	0.000118607
	ZNF487	-1.05716	3.15205e-15	6.63445e-14
	ZNF486	-1.34023	2.77689e-05	0.000133141
	ZNF474	-2.19793	6.43356e-13	1.04221e-11
	ZNF467	-1.02172	1.88738e-05	9.40735e-05
	ZNF43	-1.34149	1.2226e-06	7.64773e-06
	ZNF429	-1.06875	7.42845e-05	0.000325546
	ZNF423	-1.82198	2.63617e-13	4.48545e-12
	ZNF385B	1.29328	0.000116988	0.000488316
	ZNF385A	2.11068	5.41834e-58	3.1639e-55
	ZNF365	2.34767	2.01845e-21	8.42784e-20
	ZNF321P	-1.49143	2.34756e-11	3.1327e-10
	ZNF30-AS1	-1.57131	3.58099e-08	2.95204e-07
	ZNF295-AS1	-1.91877	0.000168741	0.000678115
	ZNF280B	-1.30129	7.02297e-05	0.000309218
	ZNF254	-1.19249	3.42284e-07	2.36488e-06
	ZNF252P-AS1	-1.16104	4.09725e-13	6.78865e-12
	ZNF239	-1.2071	7.87058e-09	7.20656e-08
	ZNF214	-1.57346	1.94687e-10	2.28125e-09
	ZNF19	-1.00241	1.53983e-12	2.4016e-11
	ZNF185	1.15111	5.6539e-12	8.17927e-11
	ZNF114-AS1	2.06287	1.19642e-10	1.4486e-09
	ZNF114	2.00398	1.62155e-15	3.55477e-14
	ZMYND12	-1.48208	1.28513e-12	2.02071e-11
	ZMYND10	-2.99453	7.48607e-20	2.63958e-18
	ZMAT1	-1.04551	5.52199e-05	0.000248554
	ZIM2-AS1	-1.58212	1.65204e-11	2.26094e-10
	ZG16B	-1.88673	8.68101e-09	7.89609e-08
	ZG16	-1.30052	0.00105668	0.0035173
	ZFYVE9P2	1.34591	0.000159859	0.000645737
	ZFP57	1.30056	1.1822e-21	5.09628e-20
	ZFP2	-1.33158	1.02993e-13	1.83932e-12
	ZFHX4-AS1	-2.01537	6.05577e-07	4.00452e-06
	ZFHX2	-1.55179	4.03511e-16	9.53457e-15
	ZDHHC11B	1.05915	2.44256e-05	0.000118886
	ZC4H2	-1.16572	8.9653e-06	4.76176e-05
	ZC2HC1C	-1.23764	7.91817e-20	2.78175e-18
	ZBTB18	-1.06495	9.8358e-16	2.22324e-14
	ZBTB10	-1.39563	6.98638e-12	9.97955e-11
	ZBED3-AS1	-1.4719	5.48098e-17	1.42244e-15
	ZBED3	-1.59338	3.60895e-21	1.45945e-19
	ZBBX	-3.76968	2.76509e-11	3.64773e-10
	ZAN	1.18391	1.1032e-17	3.12848e-16
	Z98885.2	-1.00051	1.21292e-06	7.59336e-06
	Z98257.1	-1.12886	0.0170905	0.0401395
	Z97985.1	1.23656	3.44203e-07	2.37686e-06
	Z97832.2	-1.03053	9.96832e-10	1.05108e-08
	Z97634.1	-1.19314	2.54658e-14	4.82511e-13
	Z97192.1	-1.41234	0.000449411	0.00163967
	Z97056.1	-1.76184	0.00035286	0.00132002
	Z95114.3	1.04484	2.12603e-08	1.81593e-07
	Z94160.1	-2.1701	1.63296e-07	1.20284e-06
	Z93930.1	-1.27711	0.00606739	0.0163805
	Z82246.1	1.0268	0.00796314	0.020771
	Z82186.1	-1.27361	0.000344139	0.00129116
	Z82173.1	-3.42084	2.87993e-05	0.000137619
	Z73429.1	-1.14455	0.000492484	0.00177931
	Z73420.1	-1.50198	3.21907e-10	3.65311e-09
	YWHAEP7	-2.6957	3.12631e-11	4.08839e-10
	YPEL1	-1.12489	2.35174e-08	1.99678e-07
	YBX2	-1.32718	3.33204e-08	2.76277e-07
	YAP1	1.39589	5.45658e-06	3.02969e-05
	XPNPEP2	-2.93566	0.000460386	0.00167401
	XKR7	-2.53898	5.76975e-16	1.3363e-14
	XKR4	-1.4143	7.51499e-07	4.88398e-06
	XIST	-1.18352	5.68331e-05	0.000255189
	XG	3.28813	2.19695e-35	3.1243e-33
	XAGE3	1.51816	0.0136897	0.0332254
	WSCD1	-1.66088	4.67193e-07	3.1461e-06
	WNT8B	-2.03691	7.71918e-16	1.76447e-14
	WNT7A	-1.19437	0.00163428	0.00517531
	WNT5B	1.26813	1.81308e-08	1.56634e-07
	WNT4	1.98738	4.98839e-22	2.23804e-20
	WNT3	1.65554	8.17254e-08	6.33089e-07
	WNT2B	2.24477	1.20405e-23	6.35628e-22
	WNK4	-1.93303	4.28921e-09	4.07047e-08
	WHAMMP3	1.18677	2.32029e-15	4.99841e-14
	WHAMMP2	1.13755	1.73527e-11	2.36643e-10
	WFDC8	-2.83204	5.14083e-19	1.6635e-17
	WFDC6	-1.78878	0.000887844	0.00300515
	WFDC5	6.54685	9.20868e-72	1.61315e-68
	WFDC2	-3.31951	3.75955e-22	1.69461e-20
	WFDC13	-1.4032	3.3761e-10	3.82231e-09
	WFDC12	3.08474	2.40771e-10	2.78735e-09
	WFDC10B	-1.58729	7.32586e-08	5.72448e-07
	WFDC10A	-2.27512	2.45415e-05	0.000119329
	WFDC1	-1.30449	4.32923e-09	4.10542e-08
	WDR93	-2.3085	1.43416e-27	1.07115e-25
	WDR91	1.1518	5.68248e-23	2.80047e-21
	WDR86-AS1	-1.44109	1.54219e-05	7.81829e-05
	WDR86	-1.01307	1.22138e-05	6.31061e-05
	WDR78	-2.05638	7.07508e-25	4.15017e-23
	WDR63	-1.94626	3.35814e-12	5.00268e-11
	WDR49	-1.85212	9.43199e-05	0.00040339
	WDR38	-3.42319	1.13469e-28	9.1677e-27
	WDR17	-2.05426	8.41854e-17	2.13589e-15
	WASIR2	-1.21171	1.15739e-05	6.00898e-05
	WARS1P1	-2.74338	2.36718e-10	2.74125e-09
	WARS1	1.29572	1.91717e-11	2.59613e-10
	VXN	-1.15538	2.24233e-08	1.9102e-07
	VWC2	1.24496	0.00288308	0.00854372
	VWA7	-1.6846	1.35937e-19	4.68174e-18
	VWA5B2	-2.40276	1.01756e-16	2.56479e-15
	VWA5B1	-3.2976	1.88029e-16	4.59509e-15
	VWA3B	-2.64092	4.93e-24	2.68737e-22
	VWA3A	-4.71837	1.1917e-37	1.97961e-35
	VWA2	-1.48933	3.09694e-08	2.58564e-07
	VTRNA1-3	1.48868	0.00013883	0.000568462
	VTN	2.53077	1.54421e-08	1.34796e-07
	VTCN1	-2.07371	1.1261e-08	1.0046e-07
	VSTM2L	-1.92805	3.73263e-08	3.0672e-07
	VSTM1	1.74272	1.57757e-06	9.6781e-06
	VSNL1	3.50842	1.90796e-34	2.48415e-32
	VSIG8	3.16083	0.000144335	0.000588875
	VSIG2	-2.73356	8.51473e-17	2.15888e-15
	VSIG10L	1.98716	1.33176e-16	3.31127e-15
	VSIG1	-3.12135	4.75206e-32	5.11563e-30
	VRTN	-1.04778	0.000159863	0.000645737
	VPS37D	-2.10164	2.73408e-17	7.35816e-16
	VNN3	-1.47182	3.33192e-05	0.000156979
	VNN2	-3.15051	1.07459e-25	6.82269e-24
	VNN1	-2.41205	2.58534e-11	3.42983e-10
	VN1R83P	-1.32209	6.28333e-06	3.44164e-05
	VN1R51P	-1.57822	2.4348e-06	1.44606e-05
	VMO1	-1.29132	0.000163433	0.000658843
	VIPR2	-1.26314	7.02744e-05	0.000309379
	VILL	-1.96092	2.77711e-20	1.01256e-18
	VIL1	-5.07704	1.2802e-20	4.88975e-19
	VGLL3	1.67265	7.64185e-10	8.22882e-09
	VEPH1	-2.75567	2.46657e-18	7.39759e-17
	VEGFC	1.03462	3.84546e-06	2.19498e-05
	VAMP5	1.03798	4.08073e-10	4.56641e-09
	USP6	-1.27429	1.98942e-09	1.98885e-08
	USP44	-2.22597	1.77009e-12	2.74064e-11
	USP32P3	-1.20646	2.09986e-06	1.26349e-05
	USP31	1.00731	7.42388e-28	5.66552e-26
	USP2-AS1	-1.43054	1.58466e-09	1.61351e-08
	USH1G	3.02474	2.1301e-30	2.017e-28
	USH1C	-4.63076	1.19315e-16	2.98783e-15
	URAD	-5.21463	1.40717e-05	7.18289e-05
	UQCRBP2	1.35687	0.000719802	0.00250117
	UPP2	-1.05311	6.07818e-08	4.80901e-07
	UPP1	1.28876	8.14285e-14	1.47125e-12
	UPK3A	-1.26272	0.000227825	0.00088895
	UPK1A	-1.05067	7.77429e-08	6.03937e-07
	UNGP3	1.53178	2.00233e-14	3.83346e-13
	UNC93B4	-1.98434	3.47793e-11	4.53131e-10
	UNC5CL	-2.31804	1.08218e-28	8.78025e-27
	UNC5C	-1.23963	1.97904e-06	1.19546e-05
	UNC5A	-3.4895	2.62428e-22	1.20401e-20
	UMODL1-AS1	-1.93688	4.0467e-09	3.85171e-08
	UMODL1	-2.69191	0.000146595	0.00059715
	ULBP2	1.60966	9.92863e-18	2.82391e-16
	UGT8	-1.84932	1.73983e-07	1.27401e-06
	UGT2B7	-4.37511	4.76146e-17	1.24577e-15
	UGT2B28	1.21281	0.0164451	0.0388391
	UGT2B26P	-2.45431	0.00437913	0.0123206
	UGT2B15	-4.02725	1.59875e-22	7.53228e-21
	UGT2B11	-1.58009	0.000262938	0.00101273
	UGT2A3	-5.19792	5.13524e-05	0.000232476
	UGT1A7	6.08065	3.15712e-25	1.92519e-23
	UGT1A6	1.51543	1.89762e-09	1.90301e-08
	UGDH-AS1	-1.29859	2.05356e-21	8.56519e-20
	UGDH	-1.28853	9.89164e-14	1.7698e-12
	UFL1-AS1	-1.34695	1.31403e-09	1.35958e-08
	UCP2	-1.27384	2.82603e-15	6.00731e-14
	UCN3	-2.64953	7.08009e-06	3.83445e-05
	UCN2	1.74846	1.57979e-14	3.0641e-13
	UBXN10-AS1	-1.93066	1.63029e-06	9.98565e-06
	UBXN10	-3.39039	1.25704e-20	4.80605e-19
	UBBP5	1.37735	1.96106e-05	9.73055e-05
	UBBP1	1.05957	2.67233e-06	1.57644e-05
	UBASH3B	-1.0056	2.82468e-06	1.65794e-05
	UBA52P7	1.40703	1.10851e-06	7e-06
	UBA52P3	1.26062	3.53975e-06	2.03306e-05
	U82695.1	2.28118	6.04622e-15	1.23681e-13
	U73166.1	-1.57235	7.92962e-18	2.28059e-16
	U62317.1	1.23893	7.09847e-17	1.82136e-15
	U47924.3	-1.67226	1.41558e-19	4.86665e-18
	TYROBP	1.09813	5.12922e-10	5.66404e-09
	TYMP	1.72358	1.83117e-27	1.34678e-25
	TXNDC2	1.22756	3.13558e-05	0.000148582
	TWIST1	1.06237	0.000263942	0.00101649
	TUSC8	-2.00103	0.00170973	0.00538856
	TUBB6	2.2013	2.19726e-44	5.46324e-42
	TUBB4A	-1.23514	0.014962	0.0358617
	TUBA8	-1.28492	2.70609e-19	9.00605e-18
	TUBA4B	-3.47051	1.85446e-25	1.14902e-23
	TTYH1	-1.72951	0.00415006	0.0117585
	TTR	-2.19186	0.000904164	0.00305448
	TTPA	-1.62376	0.000115237	0.000482205
	TTLL9	-2.71917	1.56863e-23	8.15837e-22
	TTLL6	-3.49522	1.79485e-18	5.48981e-17
	TTLL3	-1.39947	3.72649e-24	2.05458e-22
	TTLL2	-3.16275	1.27208e-18	3.94723e-17
	TTLL11-IT1	2.69339	3.57725e-21	1.44967e-19
	TTLL10-AS1	-2.06935	2.66233e-22	1.22002e-20
	TTLL10	-5.527	2.24664e-10	2.61029e-09
	TTC39C-AS1	-1.15777	1.12359e-06	7.08824e-06
	TTC39A-AS1	-2.50056	2.05659e-17	5.64924e-16
	TTC39A	-2.1744	1.4621e-27	1.0899e-25
	TTC34	-1.44741	3.08809e-12	4.61645e-11
	TTC29	-2.93903	3.70085e-18	1.0946e-16
	TTC25	-3.0595	3.15463e-35	4.38904e-33
	TTC23L	-1.46575	9.83449e-15	1.95872e-13
	TTC21A	-1.68568	2.80936e-30	2.60491e-28
	TTBK1	-2.72782	9.66231e-34	1.19351e-31
	TST	-1.09142	3.07888e-10	3.50953e-09
	TSPOAP1	-1.29273	1.29266e-10	1.55535e-09
	TSPO2	-1.90792	1.21788e-15	2.71776e-14
	TSPAN8	-3.92994	2.83488e-15	6.02221e-14
	TSPAN7	1.20567	1.21758e-05	6.29265e-05
	TSPAN5	1.09346	9.91454e-11	1.21378e-09
	TSPAN3	-1.61202	1.03699e-44	2.68219e-42
	TSPAN19	-1.67637	0.000734361	0.00254533
	TSPAN15	-1.07019	6.50619e-13	1.05354e-11
	TSPAN13	-1.29344	2.09175e-13	3.61497e-12
	TSPAN12	-2.32318	8.18091e-23	3.96086e-21
	TSPAN1	-1.98537	5.31041e-13	8.69036e-12
	TSNAXIP1	-1.51627	5.37208e-14	9.84473e-13
	TSLP	2.19966	2.65775e-18	7.94624e-17
	TSKS	1.91531	1.16409e-12	1.84166e-11
	TSGA10IP	1.07316	3.08022e-05	0.000146247
	TSGA10	-1.20832	5.68105e-22	2.51947e-20
	TSC22D1-AS1	-1.21497	8.68892e-13	1.39095e-11
	TSBP1	2.293	3.10484e-08	2.59111e-07
	TRPV5	-1.29007	3.14639e-09	3.04288e-08
	TRPV3	1.28923	6.50341e-09	6.02343e-08
	TRPM8	-3.16889	1.55172e-22	7.36474e-21
	TRPM5	-1.09475	0.00624553	0.0168024
	TRPC7-AS1	-2.95905	1.11178e-11	1.55242e-10
	TRPC7	-1.49633	0.00222996	0.00681906
	TRPA1	3.59853	8.73309e-08	6.7286e-07
	TRNP1	-2.26635	5.94648e-19	1.91295e-17
	TRIML2	4.33282	2.66354e-19	8.87209e-18
	TRIML1	1.14362	0.000403953	0.0014907
	TRIM80P	-1.40436	2.41671e-08	2.04924e-07
	TRIM72	1.6066	2.40458e-06	1.42899e-05
	TRIM71	-1.79628	0.0185709	0.043107
	TRIM69	1.03044	6.78393e-24	3.65148e-22
	TRIM68	-1.02806	8.56982e-09	7.80786e-08
	TRIM60P17	-1.04082	0.00476029	0.0132728
	TRIM6	1.68685	2.08902e-18	6.33926e-17
	TRIM55	-2.04986	4.46686e-15	9.26026e-14
	TRIM54	-1.9275	4.97608e-11	6.33333e-10
	TRIM36	-1.62809	2.20229e-13	3.78903e-12
	TRIM31-AS1	-2.46148	3.56666e-21	1.4469e-19
	TRIM31	-3.52989	3.51706e-25	2.12785e-23
	TRIM29	2.03483	3.48006e-27	2.50221e-25
	TRIM2	-1.53937	2.25784e-12	3.45024e-11
	TRIM17	1.15518	5.00983e-06	2.80468e-05
	TRIM16L	1.39878	4.12561e-15	8.58051e-14
	TRIM16	1.06462	1.60453e-15	3.51946e-14
	TRIM15	-2.96593	2.9406e-13	4.97488e-12
	TRIM10	-3.10288	2.42901e-17	6.61565e-16
	TREX2	1.02625	4.20028e-11	5.40663e-10
	TREML3P	1.70131	0.000691127	0.00241393
	TREML1	1.09811	1.21061e-08	1.07477e-07
	TREM2	1.17496	1.25909e-07	9.43494e-07
	TREM1	1.38597	5.52539e-08	4.40147e-07
	TREH	-3.7245	4.01327e-26	2.64841e-24
	TRDV1	1.28574	0.00375817	0.0107733
	TRBV7-9	1.34383	2.4869e-07	1.76668e-06
	TRBV7-6	1.06043	9.83906e-05	0.000418714
	TRBV6-1	1.03023	4.75313e-05	0.000216782
	TRBV5-6	1.21647	2.63166e-05	0.000127063
	TRBV4-2	1.03006	0.000148792	0.000605265
	TRBV3-1	1.04869	3.44856e-05	0.000162138
	TRBV30	1.02767	0.000121909	0.000506769
	TRBV29OR9-2	-1.36839	0.0217126	0.0493426
	TRBV28	1.04347	5.87074e-07	3.89218e-06
	TRBV27	1.07306	0.000822766	0.00281329
	TRBV24-1	1.29614	1.02205e-05	5.36925e-05
	TRBV21-1	1.05595	0.00241543	0.0073154
	TRBV20OR9-2	1.86582	5.97545e-06	3.28795e-05
	TRBV19	1.06364	2.61452e-05	0.000126299
	TRBV18	1.02387	2.68198e-05	0.000129136
	TRBV15	1.0829	0.000306994	0.00116472
	TRBV13	1.05441	0.00100836	0.0033719
	TRBV12-5	1.08655	0.00156714	0.00498433
	TRBV12-3	1.48696	1.55198e-06	9.52722e-06
	TRBJ2-2P	1.00535	0.00057089	0.00203266
	TRBJ2-1	1.1423	3.71686e-05	0.00017365
	TRAV8-1	1.39709	0.0002674	0.00102868
	TRAV38-1	1.07562	0.000337069	0.00126784
	TRAV36DV7	1.23807	1.63552e-05	8.25232e-05
	TRAV33	-3.57414	3.46914e-09	3.32994e-08
	TRAV30	-2.84171	2.63135e-13	4.4812e-12
	TRAV28	-3.38614	0.0169927	0.0399392
	TRAV27	-2.77894	0.000538526	0.00192991
	TRAV24	1.23138	0.00115072	0.00379191
	TRAV23DV6	1.22763	3.17484e-05	0.000150166
	TRAV22	1.01131	0.000189916	0.000754476
	TRAV13-2	1.15233	4.44146e-06	2.50945e-05
	TRAV12-3	1.29783	3.17109e-06	1.84191e-05
	TRAV1-2	1.01469	0.000333466	0.00125588
	TRAV1-1	1.14793	0.00058388	0.00207451
	TRAT1	1.01524	1.01705e-05	5.3466e-05
	TRARG1	2.28997	0.0162221	0.038376
	TRAM1L1	-1.37887	2.84373e-06	1.6676e-05
	TRAK1	-1.42039	1.04628e-40	2.05728e-38
	TRAJ44	1.40193	0.0110306	0.0275775
	TRAF5	-1.18245	5.85671e-20	2.08221e-18
	TRAF3IP3	1.20088	8.59106e-15	1.72443e-13
	TRABD2A	-1.34187	5.14179e-06	2.87021e-05
	TPTE2P5	-1.57348	2.49588e-21	1.02876e-19
	TPT1-AS1	-1.16995	2.75108e-24	1.52993e-22
	TPST2	1.12443	1.28838e-28	1.0366e-26
	TPSG1	-1.22405	5.55108e-16	1.2872e-14
	TPRXL	1.89302	1.26625e-12	1.99289e-11
	TPRG1LP1	1.18405	0.00181366	0.00567895
	TPRG1-AS2	1.61347	2.43025e-05	0.000118332
	TPRG1	1.98092	1.04011e-21	4.5039e-20
	TPPP3	-1.34093	6.26607e-06	3.43413e-05
	TPO	-1.41417	7.89127e-05	0.000343796
	TPM4P1	2.17518	9.87507e-05	0.000420154
	TPM1-AS	-1.60072	5.4463e-08	4.34565e-07
	TPK1	-1.49804	1.56999e-22	7.42405e-21
	TPD52L1	1.02213	4.93618e-12	7.20316e-11
	TP63	5.55765	7.94863e-95	5.10554e-91
	TP53TG3D	1.20555	1.15806e-05	6.01165e-05
	TP53I11	-1.0601	2.33141e-09	2.30444e-08
	TP53AIP1	2.95323	1.27111e-37	2.10247e-35
	TOX3	-2.98252	1.64436e-07	1.21032e-06
	TOMM20P2	1.28842	3.11994e-08	2.60146e-07
	TNXA	-1.04669	0.00139059	0.00448319
	TNS4	1.44786	2.07161e-11	2.78666e-10
	TNPO1P3	1.2805	9.16835e-10	9.73386e-09
	TNNT3	4.08362	5.13303e-32	5.47983e-30
	TNNI3K	-2.44621	2.08665e-05	0.000102927
	TNNC2	-1.32797	1.87241e-11	2.54088e-10
	TNNC1	-3.11573	2.58396e-17	6.98341e-16
	TNN	1.00945	2.17211e-05	0.000106801
	TNMD	-1.07755	0.00246734	0.00745386
	TNIP3	1.64996	7.82487e-12	1.10991e-10
	TNFSF13	-1.20887	3.08835e-16	7.3835e-15
	TNFSF10	1.64494	2.68828e-17	7.23995e-16
	TNFRSF8	1.32595	2.27183e-13	3.90169e-12
	TNFRSF19	-1.33217	2.26676e-05	0.000111002
	TNFRSF14-AS1	-1.81503	1.33359e-13	2.35219e-12
	TNFRSF11B	-1.86606	2.21358e-07	1.58922e-06
	TNFRSF11A	-1.3669	2.95647e-13	4.99516e-12
	TNFRSF10C	-1.05882	1.08491e-05	5.66781e-05
	TNFAIP8L3	1.57632	8.84801e-17	2.23749e-15
	TNFAIP8L2	1.08416	3.20135e-10	3.63729e-09
	TMPRSS5	-1.88457	9.29204e-22	4.03727e-20
	TMPRSS3	-2.49841	1.1049e-14	2.1893e-13
	TMPRSS2	-1.7112	8.61315e-09	7.84177e-08
	TMPRSS15	2.93019	0.00207761	0.00639783
	TMPRSS11GP	4.80294	2.38754e-34	3.06711e-32
	TMPRSS11F	5.41102	1.72326e-45	4.74377e-43
	TMPRSS11E	4.90437	5.22551e-44	1.2355e-41
	TMPRSS11D	6.46807	1.09478e-54	5.27396e-52
	TMPRSS11BNL	5.46304	1.01201e-33	1.24606e-31
	TMPRSS11B	4.69642	1.74708e-45	4.77521e-43
	TMPRSS11A	5.38865	5.77262e-58	3.32046e-55
	TMOD1	-2.1421	4.69546e-17	1.23141e-15
	TMIGD3	1.04214	5.74637e-10	6.29504e-09
	TMEM98	-1.00938	1.1635e-05	6.03665e-05
	TMEM97	-1.2169	2.02119e-20	7.48987e-19
	TMEM92-AS1	-1.13583	8.71689e-08	6.71746e-07
	TMEM92	-1.50769	8.95572e-11	1.10482e-09
	TMEM91	1.39486	3.76315e-17	9.97442e-16
	TMEM89	-1.51569	3.16904e-13	5.31932e-12
	TMEM88B	1.26236	1.89336e-11	2.56569e-10
	TMEM82	-2.82668	7.63785e-23	3.70724e-21
	TMEM79	2.41142	9.79108e-53	4.33722e-50
	TMEM72	-3.95545	1.79592e-36	2.70363e-34
	TMEM63C	1.22633	5.68104e-06	3.1403e-05
	TMEM63A	-1.71729	7.47334e-43	1.6272e-40
	TMEM62	-1.42525	1.12268e-29	9.76683e-28
	TMEM61	-1.03948	0.000113526	0.00047582
	TMEM59L	-1.88321	3.03865e-05	0.000144415
	TMEM52B	3.13698	1.19929e-26	8.31286e-25
	TMEM47	-1.7604	7.46851e-13	1.20129e-11
	TMEM45B	-1.47258	9.75756e-08	7.45089e-07
	TMEM45A	3.40336	1.38085e-45	3.82854e-43
	TMEM40	3.48796	1.65085e-55	8.59759e-53
	TMEM37	-1.54455	3.88578e-13	6.44936e-12
	TMEM272	-2.45051	1.03127e-22	4.9618e-21
	TMEM255A	2.23397	6.56458e-30	5.8563e-28
	TMEM252-DT	-2.42777	1.85014e-09	1.86217e-08
	TMEM252	-4.56535	1.25721e-18	3.90778e-17
	TMEM238L	-4.34477	1.55976e-22	7.38474e-21
	TMEM236	-3.07793	4.46937e-25	2.67046e-23
	TMEM233	-2.74867	7.08108e-15	1.4363e-13
	TMEM232	-1.70804	1.53147e-19	5.22775e-18
	TMEM231P1	-1.61806	1.10738e-15	2.48558e-14
	TMEM231	-1.68899	2.72448e-18	8.12684e-17
	TMEM229A	-3.20824	4.98474e-09	4.68097e-08
	TMEM220-AS1	-1.85279	3.60108e-19	1.18922e-17
	TMEM220	-1.28005	3.95966e-13	6.56914e-12
	TMEM213	-4.11425	6.81957e-13	1.10243e-11
	TMEM212	-3.26745	0.0170358	0.0400258
	TMEM211	-3.54284	1.35751e-16	3.36662e-15
	TMEM210	-2.39146	7.85191e-11	9.74573e-10
	TMEM205	-1.23249	2.94909e-15	6.2345e-14
	TMEM200C	-1.40663	4.98971e-05	0.000226393
	TMEM200B	1.40571	3.39835e-15	7.1334e-14
	TMEM178A	-2.91726	3.49548e-06	2.01061e-05
	TMEM176B	-1.75924	9.05283e-15	1.80864e-13
	TMEM176A	-2.23494	5.51462e-22	2.45413e-20
	TMEM169	-1.80217	2.5631e-14	4.85164e-13
	TMEM156	1.01201	3.44264e-08	2.84921e-07
	TMEM154	1.77826	1.22983e-22	5.86588e-21
	TMEM151A	-1.81457	2.0329e-08	1.74179e-07
	TMEM150B	-2.03099	3.2902e-16	7.84174e-15
	TMEM14EP	1.12346	0.000250177	0.000968808
	TMEM144	-1.02773	1.5806e-12	2.45822e-11
	TMEM139	-2.63283	4.07546e-14	7.56936e-13
	TMEM132E	-3.38157	1.12503e-42	2.43582e-40
	TMEM130	-1.07216	0.000513813	0.00184908
	TMEM125	-2.17033	1.96435e-23	1.01344e-21
	TMEM108	-1.3337	2.75181e-05	0.000132063
	TMEM100	-1.79139	0.0145834	0.0350797
	TMEFF1	-1.13692	0.000618465	0.00218464
	TMED6	-2.47633	2.72474e-66	2.56119e-63
	TMCC3	1.16872	3.32295e-13	5.56071e-12
	TMC5	-3.32693	1.39067e-26	9.57053e-25
	TMC3	-1.47149	1.66118e-06	1.01619e-05
	TM7SF2	-1.04741	1.33205e-07	9.9315e-07
	TM6SF2	-1.47251	1.14934e-09	1.20104e-08
	TM4SF5	-4.57604	1.31394e-11	1.8202e-10
	TM4SF4	-8.59476	4.71889e-58	2.79787e-55
	TM4SF20	-4.73338	2.99966e-17	8.03363e-16
	TM4SF19	3.50022	3.14702e-35	4.38904e-33
	TLX3	1.09987	0.00611346	0.0164887
	TLR8-AS1	-2.66363	4.63762e-10	5.14329e-09
	TLR6	1.20836	2.97169e-14	5.59483e-13
	TLR10	1.11984	2.36918e-09	2.33758e-08
	TLE6	-1.18523	1.09872e-05	5.73293e-05
	TLDC2	-1.6217	5.72463e-17	1.48267e-15
	TLCD4	-1.53562	1.04837e-12	1.6668e-11
	TLCD3B	-1.33613	1.46668e-10	1.74836e-09
	TJP3	-1.91887	8.67237e-15	1.73894e-13
	TINCR	3.54547	2.7099e-44	6.56834e-42
	TINAG	-4.62051	3.22628e-15	6.78328e-14
	TIMP3	1.50176	6.69333e-09	6.1815e-08
	TIMP1	-1.06738	1.55e-06	9.51656e-06
	TIMM8AP1	-1.9266	2.3027e-08	1.95816e-07
	TIGIT	1.07783	4.31575e-08	3.51044e-07
	TIGD4	-2.2882	1.09538e-29	9.55084e-28
	THSD7A	-1.36665	1.04403e-08	9.35934e-08
	THSD1	1.98225	6.76866e-23	3.31197e-21
	THEMIS3P	1.09421	0.000204394	0.000806341
	THEG	1.00252	9.50436e-11	1.16727e-09
	THBS4	-1.00368	0.000386207	0.00143198
	THBD	3.52457	3.04338e-56	1.62901e-53
	TGM6	3.35112	7.91667e-09	7.2436e-08
	TGM5	2.33076	2.23764e-15	4.83389e-14
	TGM3	2.84475	1.97388e-07	1.4275e-06
	TGM1	4.5189	2.28545e-55	1.17438e-52
	TGFBR3L	-1.01447	0.00143779	0.00461451
	TGFBR3	-1.11246	3.33643e-07	2.31181e-06
	TGFBI	1.2399	3.61925e-08	2.98103e-07
	TGFB1	1.17342	1.0189e-20	3.94645e-19
	TFF3	-4.38288	6.36689e-18	1.84491e-16
	TFF2	-5.71615	3.29256e-22	1.49637e-20
	TFF1	-3.93817	2.08665e-12	3.20005e-11
	TFCP2L1	-1.07207	3.5732e-05	0.000167446
	TEX55	-2.35028	2.87399e-06	1.68355e-05
	TEX49	-1.98163	6.91858e-13	1.11703e-11
	TEX46	1.00525	5.42279e-08	4.32958e-07
	TEX45	-1.15141	2.93692e-07	2.0598e-06
	TEX36	-2.84649	1.82003e-07	1.32544e-06
	TEX35	1.28147	0.00062446	0.00220345
	TEX26	-3.10457	0.000422529	0.00155276
	TEX13B	1.04397	0.000208439	0.000820784
	TESMIN	-1.23914	2.44712e-12	3.72176e-11
	TESC	-2.94255	1.97663e-15	4.29411e-14
	TERT	-1.35417	1.56578e-06	9.60883e-06
	TEPP	2.78197	1.63132e-21	6.88845e-20
	TENT5B	1.55696	4.61348e-15	9.55395e-14
	TENM2	4.93828	1.08769e-37	1.81465e-35
	TENM1	-3.19271	1.59439e-09	1.62298e-08
	TEKT5	-1.31748	1.2293e-09	1.28043e-08
	TEKT4	-1.98517	4.80538e-09	4.52246e-08
	TEKT3	-1.25953	7.85083e-10	8.43734e-09
	TEKT2	-3.65228	1.39986e-28	1.12161e-26
	TEKT1	-3.53701	6.64408e-25	3.90925e-23
	TECTB	-1.49118	3.72493e-06	2.13148e-05
	TEC	-1.11742	5.47113e-17	1.42084e-15
	TDRG1	4.37509	4.81995e-10	5.33936e-09
	TDRD12	-1.44733	0.000651806	0.00228883
	TDO2	1.4793	1.33403e-08	1.17487e-07
	TDGF1P3	-1.61041	1.68167e-08	1.45804e-07
	TDGF1	-4.32896	5.56052e-23	2.74739e-21
	TCTEX1D4	-1.49487	7.24302e-10	7.83877e-09
	TCTE1	-1.39237	3.46198e-09	3.3239e-08
	TCP11	-1.50193	1.13537e-05	5.9034e-05
	TCP10L2	-1.35869	2.08795e-13	3.61165e-12
	TCP10L	-1.06704	2.02284e-07	1.46017e-06
	TCN1	-1.38767	0.0026938	0.00805527
	TCL6	-1.72889	1.74026e-12	2.69783e-11
	TCL1A	1.71567	8.43897e-08	6.52233e-07
	TCIM	-1.41362	2.575e-06	1.52182e-05
	TCHHL1	4.91189	3.69523e-12	5.47943e-11
	TCHH	4.47642	6.44145e-32	6.80129e-30
	TCF4-AS1	3.31533	3.55562e-09	3.40786e-08
	TCF23	1.86874	0.0035282	0.0101944
	TCERG1L-AS1	-1.09489	0.020971	0.0479018
	TCEAL5	-1.48452	2.5132e-05	0.000121832
	TCEAL3-AS1	-1.07923	0.00109314	0.00362677
	TCAP	-3.40285	5.51264e-12	7.99291e-11
	TCAF2P1	1.08772	2.05751e-10	2.40432e-09
	TCAF2	1.68014	1.89054e-32	2.07577e-30
	TC2N	-1.06745	5.31684e-10	5.85278e-09
	TBX21	1.11177	3.30207e-08	2.74323e-07
	TBX15	-2.22098	3.77337e-12	5.58417e-11
	TBX10	-4.30561	3.1096e-48	1.09946e-45
	TBC1D2	1.02695	6.25378e-16	1.44407e-14
	TBC1D16	-1.40188	7.408e-15	1.49553e-13
	TAT-AS1	-1.25524	0.00024943	0.000966014
	TAS2R60	1.36051	1.85769e-05	9.27977e-05
	TAS1R1	-1.91826	3.3509e-11	4.36876e-10
	TARDBPP2	-1.7183	3.81692e-08	3.13379e-07
	TAP2	1.0639	1.2115e-17	3.42301e-16
	TAFA5	-1.08557	4.02381e-05	0.000186611
	TACSTD2	1.31272	7.30997e-17	1.87313e-15
	TAAR3P	-3.35739	1.30715e-08	1.1541e-07
	TAAR1	-6.54425	3.96581e-26	2.62159e-24
	SYTL2	-1.17699	3.06098e-08	2.5595e-07
	SYT5	-1.63666	3.43212e-05	0.000161424
	SYT15	1.64817	5.26145e-19	1.7011e-17
	SYT14P1	1.62834	1.09051e-09	1.1439e-08
	SYT13	-2.09807	0.000532675	0.00191054
	SYT10	-2.93947	1.34094e-11	1.8536e-10
	SYT1	1.97381	1.82174e-08	1.57276e-07
	SYPL2	-1.78722	1.25172e-15	2.78187e-14
	SYPL1P2	-1.06323	7.40462e-08	5.77782e-07
	SYNPR-AS1	-1.73634	0.000931589	0.00313751
	SYNPO2L	1.12296	6.43274e-07	4.23057e-06
	SYNE4	-1.05391	5.37005e-05	0.000242167
	SYN3	-1.28856	4.01531e-06	2.28576e-05
	SYDE1	1.01816	3.16232e-08	2.63395e-07
	SYCP1	1.24506	0.000129806	0.000535505
	SYCN	1.04822	0.00343917	0.0099806
	SYCE1	-1.19179	0.000374322	0.00139193
	SYBU	-1.4489	9.64723e-09	8.70917e-08
	SVOPL	-1.70847	9.34402e-07	5.97989e-06
	SVIP	-1.48463	1.04665e-11	1.46626e-10
	SV2B	1.39988	7.87796e-07	5.10095e-06
	SUSD5	-1.00059	0.00129196	0.00419857
	SUSD4	1.16365	2.46841e-07	1.7542e-06
	SUSD2	-1.64006	1.76391e-10	2.07825e-09
	SUN3	1.65182	2.51713e-05	0.000121976
	SUMO1P1	2.32545	0.00551682	0.0151003
	SULT1C4	-1.53071	5.24314e-07	3.50382e-06
	SULT1C2P1	-2.21789	7.18227e-17	1.84163e-15
	SULT1C2	-4.19718	1.40313e-43	3.18091e-41
	SULT1A2	-1.13303	0.000111815	0.000469415
	SUGT1P4-STRA6LP	-1.27447	1.53215e-09	1.56417e-08
	SUGT1P3	-1.16401	1.52325e-18	4.69635e-17
	SUCNR1	-2.21016	6.29932e-16	1.45371e-14
	STXBP6	-3.3115	5.01572e-20	1.78982e-18
	STX1A	-1.28845	6.67899e-15	1.3576e-13
	STX11	1.69054	2.99156e-23	1.51899e-21
	STUM	-2.26985	6.75097e-13	1.09226e-11
	STS	-1.16583	1.90544e-10	2.23543e-09
	STRIT1	-1.47227	0.00148638	0.00475424
	STRA8	1.18443	0.00657802	0.0175853
	STRA6LP	-1.13934	1.54751e-12	2.41162e-11
	STRA6	-1.65632	3.08774e-09	2.99292e-08
	STPG3-AS1	-1.42685	2.62956e-09	2.5734e-08
	STPG3	-1.57252	7.47355e-11	9.29407e-10
	STOX1	-1.2378	4.95268e-08	3.98131e-07
	STON2	1.29147	5.96707e-17	1.54339e-15
	STOML3	-2.76253	2.53368e-14	4.80303e-13
	STMND1	-1.34871	0.0011605	0.00382118
	STMN2	-3.02763	1.80586e-20	6.73729e-19
	STK36	-1.23181	1.30637e-23	6.85916e-22
	STK33	-1.69478	9.70312e-08	7.41205e-07
	STK32B	-3.02175	1.06742e-30	1.03882e-28
	STK31	-1.48856	2.20595e-06	1.3236e-05
	STEAP3-AS1	1.71651	1.2048e-14	2.37624e-13
	STEAP2	-1.25641	7.19018e-10	7.78815e-09
	STEAP1B	1.51568	4.20734e-24	2.30978e-22
	STATH	1.30486	0.0151963	0.0363172
	STARD5	2.18268	3.98501e-40	7.34824e-38
	STARD10	-1.61961	2.49942e-20	9.14768e-19
	STAR	2.95081	6.77192e-23	3.31197e-21
	ST8SIA3	-2.11064	1.61691e-19	5.4854e-18
	ST8SIA2	-1.1192	0.00533471	0.014679
	ST6GALNAC4	-1.35684	4.69398e-23	2.3312e-21
	ST6GALNAC2	1.00001	1.17355e-14	2.31816e-13
	ST6GALNAC1	-1.77284	3.67087e-10	4.13902e-09
	ST6GAL1	-2.05625	4.9011e-19	1.5953e-17
	ST3GAL4	-1.17433	2.96534e-09	2.88153e-08
	ST13P20	2.22846	3.49539e-12	5.19509e-11
	SSUH2	-1.18423	3.06683e-11	4.01742e-10
	SSTR5-AS1	-2.94912	1.93424e-08	1.66243e-07
	SSTR5	-2.26807	2.66014e-07	1.87867e-06
	SSTR2	-1.25245	2.06826e-05	0.000102086
	SSTR1	-3.54909	1.20144e-16	3.00273e-15
	SST	-1.19116	0.000528377	0.00189636
	SSPOP	-1.29018	1.89748e-07	1.37664e-06
	SSC4D	1.45149	6.84853e-06	3.72356e-05
	SRXN1	1.01077	4.50568e-10	5.00416e-09
	SRRM3	2.27891	1.84494e-21	7.73649e-20
	SRPX2	1.06622	4.5021e-08	3.65046e-07
	SRPX	1.49107	1.12883e-09	1.18218e-08
	SRP72P1	1.78361	3.50226e-07	2.41369e-06
	SRP68P3	-1.07587	0.00205281	0.00633158
	SRP54-AS1	-1.12302	3.36031e-13	5.62079e-12
	SRMS	-2.05723	2.72735e-14	5.14989e-13
	SRGAP3-AS4	-2.18351	1.5918e-12	2.47465e-11
	SRGAP3-AS2	-3.52637	2.94313e-17	7.8987e-16
	SRD5A2	-2.07618	7.23384e-20	2.55532e-18
	SRCIN1	-1.25448	1.15887e-08	1.0324e-07
	SQLE	1.0019	4.83789e-13	7.96784e-12
	SPX	-3.05363	5.46526e-14	1.0006e-12
	SPTLC1P4	1.21038	0.00869139	0.0223902
	SPRY4-AS1	-1.26844	1.8503e-05	9.24648e-05
	SPRY3	-1.70194	1.31845e-24	7.57252e-23
	SPRY2	-1.21363	1.00379e-09	1.05812e-08
	SPRY1	-1.86024	3.55018e-26	2.36713e-24
	SPRR4	5.84836	2.02075e-36	3.03025e-34
	SPRR3	4.75237	5.3449e-51	2.10191e-48
	SPRR2G	5.34503	1.73258e-38	2.96764e-36
	SPRR2F	5.34512	2.01551e-48	7.1922e-46
	SPRR2E	6.65658	1.35511e-61	1.00432e-58
	SPRR2D	6.08417	1.66811e-53	7.74547e-51
	SPRR2C	6.29901	4.45878e-44	1.06731e-41
	SPRR2B	6.85151	6.53115e-28	5.01403e-26
	SPRR2A	5.45847	1.35369e-51	5.49158e-49
	SPRR1B	6.81875	2.85286e-61	2.07446e-58
	SPRR1A	6.43657	2.53191e-56	1.37433e-53
	SPP1	1.35462	1.22084e-15	2.72279e-14
	SPON2	-1.09024	8.13175e-07	5.25557e-06
	SPOCD1	1.05009	2.92728e-06	1.71164e-05
	SPNS3	-1.87371	8.86969e-15	1.77389e-13
	SPNS2	-1.69413	1.15759e-12	1.83289e-11
	SPINK7	4.78615	3.12831e-34	3.97895e-32
	SPINK6	6.90032	1.31721e-32	1.46293e-30
	SPINK5	3.93848	1.70369e-40	3.28293e-38
	SPINK2	1.69256	2.38884e-09	2.35517e-08
	SPINK14	-2.12731	5.42824e-05	0.000244591
	SPINK13	3.41902	2.36702e-09	2.33605e-08
	SPINK1	-1.61384	2.62066e-08	2.21195e-07
	SPIC	-4.62058	6.88446e-06	3.74007e-05
	SPIB	1.25369	1.54332e-05	7.82295e-05
	SPEF2	-1.99714	8.61305e-15	1.72795e-13
	SPEF1	-2.48143	1.4231e-13	2.50548e-12
	SPDEF	-3.06092	7.14766e-15	1.44752e-13
	SPATA6L	-1.71314	9.66751e-18	2.7537e-16
	SPATA6	-1.64018	1.92421e-12	2.9651e-11
	SPATA41	1.37386	2.48016e-17	6.73592e-16
	SPATA4	-1.20517	5.82227e-06	3.20962e-05
	SPATA3-AS1	-1.53415	6.22698e-09	5.77851e-08
	SPATA19	1.94203	1.12485e-05	5.85741e-05
	SPATA17-AS1	-1.57832	0.000362988	0.00135397
	SPATA17	-2.29885	1.55077e-21	6.56762e-20
	SPATA13	-1.39855	1.30544e-20	4.97628e-19
	SPATA12	-1.09553	3.99962e-09	3.81443e-08
	SPANXB1	5.6417	6.48672e-05	0.00028738
	SPAG8	-2.56556	7.50697e-37	1.15263e-34
	SPAG6	-4.49309	3.76893e-26	2.50865e-24
	SPAG16	-1.05488	8.18396e-10	8.76846e-09
	SPAG11A	-3.65126	0.000934362	0.00314547
	SPAG1	-1.18173	2.86078e-18	8.52023e-17
	SPACA6P-AS	-1.3566	4.42809e-09	4.19195e-08
	SPA17	-1.27277	2.01748e-13	3.49289e-12
	SP8	-2.45069	1.65178e-08	1.43406e-07
	SP6	1.10068	3.01389e-05	0.000143362
	SP3P	-1.39669	4.58311e-08	3.70679e-07
	SOX9-AS1	-1.18353	1.45992e-07	1.08262e-06
	SOX9	-1.54425	4.68277e-14	8.62665e-13
	SOX7	2.79969	1.32791e-40	2.58466e-38
	SOX5	-1.2243	9.35875e-06	4.95095e-05
	SOX3	-3.21622	1.30936e-10	1.57301e-09
	SOX2-OT	2.49392	0.00103148	0.00344115
	SOX17	-3.50974	3.73582e-23	1.88203e-21
	SOX15	4.14196	9.91536e-85	4.24587e-81
	SOX11	-2.57594	7.65367e-05	0.000334313
	SOX1	2.61615	0.00157952	0.00501921
	SOWAHC	1.66193	3.94084e-27	2.82823e-25
	SOWAHA	-3.18635	8.40621e-35	1.11713e-32
	SOST	2.31719	9.43247e-08	7.23131e-07
	SORL1	-1.41657	1.36228e-12	2.13505e-11
	SORBS2	-2.43128	1.6252e-18	4.98676e-17
	SOHLH2	-1.60209	0.0096367	0.0245012
	SOD3	-1.414	2.13431e-11	2.864e-10
	SOBP	-1.63962	9.72641e-10	1.02782e-08
	SNX31	4.20559	1.8123e-30	1.72455e-28
	SNX18P7	1.79817	5.6427e-12	8.16613e-11
	SNX18P13	1.53792	1.77145e-05	8.89047e-05
	SNTN	-3.54746	3.73188e-08	3.0672e-07
	SNTG2-AS1	-1.94858	3.1845e-06	1.84858e-05
	SNTG2	-1.42188	0.000193089	0.000766135
	SNTB1	-2.08026	2.21884e-21	9.17511e-20
	SNRPCP9	-1.33501	0.0175636	0.0410855
	SNRPCP4	-1.14347	0.0151375	0.0361947
	SNRPCP16	-1.45032	0.000826354	0.0028243
	SNRPCP13	-1.72767	0.000137702	0.000564502
	SNPH	-1.21875	1.38814e-06	8.59125e-06
	SNORD93	1.32805	9.25491e-07	5.9268e-06
	SNORD116-4	-1.03669	0.0217296	0.0493713
	SNORC	-1.04113	1.50618e-17	4.20932e-16
	SNORA84	-1.08266	0.00609051	0.0164383
	SNORA79B	-1.21808	1.7568e-06	1.06976e-05
	SNORA49	-1.20863	0.00406463	0.0115428
	SNORA47	-1.87404	1.93565e-11	2.61747e-10
	SNORA22C	-1.03428	0.00172421	0.00542711
	SNHG27	2.44674	0.00283685	0.00843071
	SNHG26	1.39367	2.27426e-13	3.90413e-12
	SNED1	-1.05315	1.23406e-07	9.26185e-07
	SNCG	2.22757	5.2514e-24	2.8545e-22
	SNAP25	-1.11114	0.00126552	0.00412343
	SNAI2	3.05299	5.9501e-65	5.0958e-62
	SMYD3-IT1	-1.14408	0.00819357	0.0213028
	SMTNL2	-2.66532	5.04421e-12	7.35245e-11
	SMPDL3B	-1.27929	1.44755e-09	1.48488e-08
	SMPD5	1.42494	5.27418e-11	6.69064e-10
	SMPD4P1	2.8119	2.22986e-18	6.72431e-17
	SMPD3	-2.49194	7.68625e-33	8.76391e-31
	SMLR1	-1.05949	8.64375e-08	6.66643e-07
	SMIM6	-4.62936	2.39744e-44	5.92276e-42
	SMIM32	-4.09267	2.16179e-18	6.54464e-17
	SMIM31	-3.98607	5.75447e-14	1.05105e-12
	SMIM3	1.06878	1.57838e-10	1.87455e-09
	SMIM2-AS1	-1.57557	5.21373e-14	9.57731e-13
	SMIM24	-3.12477	4.56491e-58	2.74886e-55
	SMIM22	-1.12684	1.92313e-07	1.39315e-06
	SMIM17	-1.39428	1.84097e-05	9.20459e-05
	SMIM14	-1.17393	3.48802e-18	1.03324e-16
	SMIM1	-1.27295	2.25582e-07	1.61791e-06
	SMILR	2.88195	1.36835e-20	5.19556e-19
	SMCP	3.96633	5.19187e-07	3.47378e-06
	SMCO1	1.07551	5.99455e-10	6.55945e-09
	SMAD9-IT1	-1.06677	0.00230537	0.00702402
	SMAD6	-1.22579	1.42262e-12	2.2269e-11
	SMAD5-AS1	1.63837	2.28961e-13	3.92698e-12
	SLURP1	2.95757	1.96707e-12	3.02751e-11
	SLPI	-1.76527	2.40069e-11	3.19918e-10
	SLN	-1.10366	0.00551426	0.0150944
	SLITRK6	-1.29469	0.00390524	0.0111394
	SLITRK5	-1.71323	1.28968e-05	6.63149e-05
	SLITRK2	-2.86878	9.58226e-19	3.02697e-17
	SLIT2	-1.85898	1.49771e-11	2.05702e-10
	SLIT1	-1.24499	0.000991888	0.00332201
	SLFN13	-1.4104	2.16514e-10	2.52015e-09
	SLFN11	-1.35991	6.64301e-12	9.52436e-11
	SLCO5A1	-1.98133	2.02275e-16	4.9245e-15
	SLCO4C1	-2.57377	6.94613e-12	9.92942e-11
	SLCO4A1-AS1	-1.9767	8.11225e-10	8.69404e-09
	SLCO4A1	-1.16345	1.60312e-05	8.10266e-05
	SLCO1B7	-1.04433	0.0108619	0.027237
	SLCO1B3-SLCO1B7	-1.5349	0.00155783	0.00495889
	SLCO1B3	-1.85074	0.00217818	0.006675
	SLCO1B1	-2.08138	0.000691994	0.00241674
	SLC9C2	-1.70527	1.69109e-08	1.46588e-07
	SLC9A9	2.07136	4.82766e-22	2.16845e-20
	SLC9A3R2	-1.61771	1.4587e-20	5.52227e-19
	SLC9A3P2	3.75915	4.26343e-23	2.13387e-21
	SLC9A2	-1.18448	0.0011109	0.00367808
	SLC8A2	1.08555	1.36323e-16	3.37863e-15
	SLC7A3	-1.29521	0.00242166	0.00733196
	SLC6A8	1.15895	1.2043e-10	1.45676e-09
	SLC6A20	-5.26702	1.37646e-45	3.82854e-43
	SLC6A2	1.04973	6.77134e-34	8.47275e-32
	SLC6A19	-3.87784	0.00343274	0.00996494
	SLC6A18	-1.09151	0.000121311	0.000504717
	SLC6A13	-1.60057	2.58615e-06	1.52771e-05
	SLC6A12	-1.56341	1.14955e-08	1.02433e-07
	SLC6A11	2.20292	3.93365e-12	5.81285e-11
	SLC66A1L	-2.27155	2.19622e-07	1.57764e-06
	SLC5A9	-2.79416	6.00898e-24	3.25253e-22
	SLC5A8	-3.06926	7.20004e-06	3.89121e-05
	SLC5A7	1.24456	0.00497411	0.0138051
	SLC5A5	-2.41266	9.11304e-09	8.25593e-08
	SLC5A2	-1.49844	7.17941e-15	1.45166e-13
	SLC5A1	-2.71292	1.05065e-14	2.08717e-13
	SLC52A1	1.27201	7.12172e-08	5.58081e-07
	SLC51B	-2.62935	9.54584e-16	2.16404e-14
	SLC4A8	-2.0776	2.75971e-15	5.87604e-14
	SLC4A4	-3.23697	1.64435e-18	5.04151e-17
	SLC49A3	-1.25503	1.89291e-12	2.92037e-11
	SLC47A2	1.53815	1.226e-09	1.27769e-08
	SLC47A1P2	1.92649	3.81915e-08	3.13496e-07
	SLC46A3	-1.09729	4.01734e-08	3.28644e-07
	SLC45A3	-1.68936	4.75011e-18	1.39107e-16
	SLC44A4	-3.66443	1.77621e-30	1.69439e-28
	SLC44A3-AS1	-1.2158	1.00576e-09	1.05962e-08
	SLC44A3	-1.32144	1.14716e-15	2.5659e-14
	SLC43A1	-1.70021	1.25835e-18	3.90778e-17
	SLC41A2	-1.87466	6.27954e-26	4.06053e-24
	SLC40A1	-2.6478	3.33458e-34	4.22735e-32
	SLC3A1	-5.68145	1.51992e-74	3.25422e-71
	SLC39A8	-1.67253	7.74803e-18	2.23504e-16
	SLC39A5	-5.58249	1.48694e-138	5.73051e-134
	SLC39A2	2.96289	5.13659e-22	2.29918e-20
	SLC39A11	-1.10012	7.57628e-25	4.43742e-23
	SLC38A8	-4.26701	1.33115e-19	4.59276e-18
	SLC38A3	-1.37199	4.71765e-05	0.000215393
	SLC37A4	-1.03304	1.9303e-20	7.17374e-19
	SLC37A2	1.03774	5.969e-33	6.9289e-31
	SLC35G2	1.70139	5.54602e-24	3.0104e-22
	SLC35F3	1.51162	4.61844e-06	2.60029e-05
	SLC35F1	-1.09155	1.3179e-09	1.36278e-08
	SLC35E1P1	-1.47304	6.73627e-09	6.21521e-08
	SLC34A2	-3.67081	3.52509e-15	7.37932e-14
	SLC34A1	2.4301	8.46008e-28	6.43083e-26
	SLC32A1	-1.99264	0.0141589	0.034205
	SLC31A2	1.47686	5.10599e-19	1.655e-17
	SLC31A1P1	1.18488	7.51945e-05	0.00032901
	SLC30A2	-4.72173	8.6057e-42	1.80247e-39
	SLC2A9	1.6211	1.84685e-21	7.73649e-20
	SLC2A7	1.2765	3.84625e-06	2.19503e-05
	SLC2A5	1.25221	1.87018e-11	2.53873e-10
	SLC2A13	-1.49378	6.37311e-16	1.46986e-14
	SLC2A10	-1.77216	8.69095e-13	1.39095e-11
	SLC2A1	1.72345	1.56418e-23	8.14619e-22
	SLC29A4	-1.60492	5.73417e-08	4.5593e-07
	SLC29A2	-1.18802	7.18111e-19	2.2929e-17
	SLC28A3	1.05568	7.29641e-08	5.70725e-07
	SLC28A2	-4.01239	4.74414e-19	1.54813e-17
	SLC27A6	-1.35054	0.00177666	0.00557442
	SLC27A2	-1.17209	1.18006e-06	7.40571e-06
	SLC27A1	-1.23962	2.73217e-21	1.11897e-19
	SLC26A8	-1.54154	3.0757e-18	9.14387e-17
	SLC26A7	-4.06923	2.6704e-39	4.72086e-37
	SLC26A4-AS1	-1.01281	0.00615244	0.0165787
	SLC26A3	-8.29304	5.37343e-37	8.41815e-35
	SLC26A1	-1.2488	1.77266e-16	4.34307e-15
	SLC25A5P5	1.19493	1.34193e-06	8.3226e-06
	SLC25A5P1	-1.08575	3.4531e-08	2.85578e-07
	SLC25A47P1	-3.03333	1.13246e-09	1.18565e-08
	SLC25A47	-1.58272	2.90485e-12	4.36112e-11
	SLC25A30-AS1	-2.02237	3.1507e-27	2.27814e-25
	SLC25A29	-1.04788	2.65471e-13	4.51301e-12
	SLC25A27	-1.1387	1.00883e-07	7.68714e-07
	SLC25A25-AS1	-1.79906	1.18688e-30	1.14639e-28
	SLC24A3	1.07168	2.50983e-06	1.48649e-05
	SLC23A1	-2.77313	4.80747e-40	8.78081e-38
	SLC22A31	-1.17753	1.46038e-08	1.27855e-07
	SLC22A25	1.03128	2.58403e-10	2.98161e-09
	SLC22A20P	1.00503	3.41261e-06	1.96737e-05
	SLC22A18	-1.11799	4.88819e-11	6.23588e-10
	SLC22A11	-1.7814	1.65153e-13	2.88785e-12
	SLC22A1	1.73261	4.19086e-06	2.37832e-05
	SLC1A7	-3.58813	1.31175e-40	2.56616e-38
	SLC1A6	5.15234	4.41051e-24	2.41787e-22
	SLC1A3	1.33092	1.70701e-08	1.47901e-07
	SLC17A9	-2.7432	1.42924e-44	3.6721e-42
	SLC17A8	-1.00759	0.0100611	0.0254443
	SLC17A4	-5.39124	5.61574e-19	1.81109e-17
	SLC17A1	-2.02306	9.48517e-08	7.26304e-07
	SLC16A9	-1.02348	0.000806041	0.00276346
	SLC16A5	-1.02372	1.8563e-09	1.86675e-08
	SLC16A4	-1.70551	3.7094e-09	3.54731e-08
	SLC16A2	1.52203	7.06006e-13	1.13797e-11
	SLC16A12	-2.66674	6.95127e-06	3.77211e-05
	SLC16A11	-1.08891	1.39905e-05	7.14715e-05
	SLC16A1	1.25016	2.60243e-11	3.45013e-10
	SLC15A1	-1.71674	1.73405e-07	1.27075e-06
	SLC14A1	-2.05683	8.19262e-18	2.34573e-16
	SLC13A5	2.58132	1.63757e-14	3.16979e-13
	SLC13A3	-1.4774	2.21022e-09	2.1935e-08
	SLC13A2	-3.78235	2.35488e-18	7.07363e-17
	SLC12A7	-1.2284	2.38399e-11	3.17912e-10
	SLC12A2	-2.04349	5.74579e-32	6.10019e-30
	SLC10A6	4.38973	1.62876e-44	4.12965e-42
	SLC10A4	-1.1723	0.0129024	0.0315872
	SLC10A2	-2.38595	0.00659902	0.0176302
	SLAMF9	2.99553	1.03655e-18	3.25837e-17
	SLAIN1	-2.20459	7.84178e-17	1.99877e-15
	SKINT1L	-1.97613	4.19056e-12	6.16412e-11
	SKAP1	-1.26246	8.52073e-10	9.10398e-09
	SIX3-AS1	-1.98096	0.00533724	0.0146849
	SIX3	-1.75076	0.00180932	0.00566861
	SIX1	-1.38451	4.25754e-07	2.89028e-06
	SIRPG	1.11352	7.73754e-08	6.01567e-07
	SIRPB2	1.51978	1.13086e-20	4.34517e-19
	SIRLNT	3.38388	0.00437485	0.0123103
	SIGLEC15	-2.85121	1.17385e-26	8.18067e-25
	SIGLEC1	1.01832	1.99503e-07	1.44144e-06
	SIAH3	-1.28508	1.83686e-05	9.18765e-05
	SI	-7.81261	3.09313e-15	6.51756e-14
	SHROOM3-AS1	-1.15789	1.76557e-06	1.07476e-05
	SHROOM3	-2.00034	1.69714e-24	9.59034e-23
	SHOC1	1.6466	1.55774e-17	4.34711e-16
	SHISA9	-1.29643	0.0176002	0.041151
	SHISA8	-1.84218	0.00969063	0.0246173
	SHH	-2.04675	1.24936e-11	1.73448e-10
	SHCBP1L	-1.52951	0.0102354	0.0258309
	SHC2	-1.43008	2.00029e-09	1.9992e-08
	SHANK2	-1.35073	8.31019e-06	4.44136e-05
	SHANK1	-1.31675	1.1157e-07	8.43096e-07
	SH3RF1	-1.44619	1.21528e-32	1.35756e-30
	SH3PXD2A-AS1	1.79839	2.59042e-22	1.1899e-20
	SH3GL3	2.03984	2.18464e-11	2.92645e-10
	SH3BP1	1.02942	1.13942e-22	5.44815e-21
	SH3BGRL2	-2.17739	2.60192e-23	1.32991e-21
	SH2D6	-2.12526	3.48766e-18	1.03324e-16
	SH2D5	2.71446	1.28024e-19	4.42504e-18
	SH2D1A	1.09971	3.30021e-07	2.28959e-06
	SGSM3-AS1	-1.43212	1.10334e-12	1.75058e-11
	SGSM3	-1.24546	4.9961e-31	5.01419e-29
	SGSM1	-1.7724	1.07169e-09	1.126e-08
	SGK2	-3.77613	1.15044e-46	3.51879e-44
	SGK1	1.55027	5.25734e-22	2.34505e-20
	SGCE	-1.03335	7.8443e-05	0.000342097
	SFTPD	2.2053	1.25984e-14	2.4772e-13
	SFTPA2	-3.89742	3.48885e-17	9.30498e-16
	SFTA2	-4.48031	4.29601e-22	1.93416e-20
	SFTA1P	5.26342	2.15242e-18	6.52138e-17
	SFN	2.93677	2.47988e-67	2.51506e-64
	SEZ6L2	-1.07343	1.02255e-05	5.37116e-05
	SESTD1	-1.02371	3.45348e-12	5.13478e-11
	SESN3	1.0172	1.17941e-09	1.23113e-08
	SERTM1	-3.15016	1.85117e-07	1.34634e-06
	SERTAD4-AS1	-1.59174	3.48574e-13	5.81545e-12
	SERPINI2	-2.25089	1.71207e-05	8.616e-05
	SERPINF2	-1.22196	5.56526e-10	6.10878e-09
	SERPINE1	1.27212	2.09024e-13	3.61398e-12
	SERPINC1	1.40201	8.09309e-08	6.27312e-07
	SERPINB8	1.26408	1.12199e-24	6.46346e-23
	SERPINB5	2.44909	1.36356e-24	7.81996e-23
	SERPINB4	3.42915	1.39005e-26	9.57053e-25
	SERPINB3	2.1076	2.5933e-20	9.46432e-19
	SERPINB2	2.29912	2.04964e-12	3.14957e-11
	SERPINB13	6.99208	3.49936e-68	3.74617e-65
	SERPINB12	6.39987	6.02682e-44	1.41627e-41
	SERPINB11	2.3079	3.62537e-07	2.49274e-06
	SERPINB10	1.60439	5.15097e-05	0.000233106
	SERPINA9	2.35681	1.02697e-14	2.04223e-13
	SERPINA6	-3.82371	9.83599e-17	2.48407e-15
	SERPINA5	-2.87541	3.64703e-15	7.6263e-14
	SERPINA4	-5.73479	8.22413e-14	1.48315e-12
	SERPINA12	1.06748	0.000647641	0.00227566
	SERPINA1	-2.72335	7.48239e-22	3.28059e-20
	SEPTIN2P1	-1.58298	0.000186658	0.00074299
	SEPTIN14P4	-1.16376	7.14601e-05	0.000314133
	SEPHS2P1	1.08344	0.00115123	0.00379304
	SENCR	1.59191	2.50079e-10	2.89076e-09
	SEMA6D	1.65313	9.85778e-11	1.20798e-09
	SEMA4G	-2.44346	1.16542e-25	7.36297e-24
	SEMA3D	-1.86335	1.38467e-07	1.02979e-06
	SEMA3B-AS1	-1.98281	5.6145e-12	8.12917e-11
	SEMA3B	-1.51464	1.40448e-06	8.68396e-06
	SEMA3A	-1.08786	0.00574602	0.0156388
	SELENOV	-1.33853	0.00243707	0.00737396
	SELENBP1	-1.71533	1.39612e-11	1.92436e-10
	SEL1L3	-1.51115	1.28149e-18	3.97325e-17
	SEC23A-AS1	-1.3204	5.91492e-07	3.91877e-06
	SEC14L6	-2.76198	2.77901e-22	1.26746e-20
	SDR9C7	6.2178	1.17548e-57	6.66204e-55
	SDR42E2	-1.68952	1.95469e-17	5.3847e-16
	SDC2	-1.14526	1.14665e-05	5.95805e-05
	SDC1	1.20823	7.19465e-19	2.29532e-17
	SCX	-1.46316	1.37682e-10	1.64531e-09
	SCUBE1-AS2	-1.65312	0.00738059	0.0194423
	SCUBE1	-1.61405	0.000775172	0.00266807
	SCTR-AS1	-7.28681	2.19155e-47	7.03834e-45
	SCTR	-2.43711	1.80142e-40	3.43687e-38
	SCRT2	-1.20404	4.76078e-08	3.83921e-07
	SCN4B	1.22822	3.31451e-09	3.19185e-08
	SCN3B	1.12749	0.000743712	0.00257196
	SCN2A	1.95852	7.48099e-09	6.86615e-08
	SCIN	-1.81505	1.31543e-10	1.5788e-09
	SCGN	-3.39754	2.50187e-11	3.32481e-10
	SCGB3A1	-5.85958	1.47746e-35	2.10888e-33
	SCGB2A2	-2.23969	0.0050933	0.0140902
	SCGB2A1	-5.85508	1.91963e-34	2.49092e-32
	SCGB1D2	-2.64367	0.000110445	0.000464322
	SCGB1D1	-6.42496	6.55319e-11	8.20778e-10
	SCG3	-2.09376	6.89431e-14	1.25153e-12
	SCEL	1.37583	3.15777e-06	1.83639e-05
	SCARNA9	-1.03969	1.27615e-07	9.55168e-07
	SCARNA22	-1.17064	2.74006e-07	1.92946e-06
	SBSPON	-1.97906	5.45809e-13	8.91311e-12
	SBSN	7.03283	6.72479e-61	4.71212e-58
	SBK1	-1.41025	2.24893e-08	1.91497e-07
	SAXO2	-1.50142	3.25086e-12	4.84848e-11
	SATB1-AS1	-1.22486	1.04985e-06	6.67e-06
	SARM1	-1.26474	2.56571e-15	5.49332e-14
	SAPCD1-AS1	-1.53068	3.83403e-13	6.3662e-12
	SAMSN1-AS1	1.0031	0.000138533	0.000567426
	SAMD9	2.2317	1.39288e-35	1.99555e-33
	SAMD15	-1.15398	2.18107e-10	2.53794e-09
	SAMD13	-1.6488	4.80181e-17	1.25462e-15
	SAMD11	-2.04039	1.95154e-11	2.63527e-10
	SALRNA1	-1.79763	2.54911e-10	2.94308e-09
	SALL2	-1.35759	3.4926e-07	2.40874e-06
	SALL1	-2.06991	1.30975e-10	1.57301e-09
	SAA4	-1.13891	0.0017176	0.00540849
	S1PR5	3.5477	1.19853e-69	1.53968e-66
	S100G	-3.00461	3.22942e-05	0.000152541
	S100B	1.19406	2.87297e-07	2.01704e-06
	S100A9	4.01638	1.63231e-41	3.31093e-39
	S100A8	5.70913	9.05778e-70	1.20372e-66
	S100A7A	5.7754	2.6756e-40	5.03e-38
	S100A7	5.47863	2.11616e-46	6.30675e-44
	S100A6	-1.1058	1.17916e-08	1.04926e-07
	S100A5	-1.17393	2.63348e-07	1.86155e-06
	S100A3	2.41012	4.47696e-19	1.46467e-17
	S100A2	2.60316	2.68058e-24	1.49288e-22
	S100A15A	4.39907	1.72081e-07	1.26248e-06
	S100A14	1.21798	4.1547e-11	5.35154e-10
	S100A12	4.3272	6.79581e-43	1.48809e-40
	S100A1	-1.39821	1.68869e-06	1.03073e-05
	RYR3	1.72857	4.67456e-11	5.97522e-10
	RYR1	1.84595	1.06463e-16	2.67819e-15
	RXFP4	-2.4433	1.26247e-12	1.98833e-11
	RWDD2A	-1.09715	1.52324e-23	7.95447e-22
	RUNDC3A	1.12768	2.05922e-05	0.000101705
	RUBCNL	-1.3354	0.00111704	0.00369557
	RTRAFP2	-1.47292	6.21317e-07	4.09666e-06
	RTP3	2.22614	4.74019e-05	0.000216269
	RTN4RL1	-1.20589	0.000659706	0.00231426
	RTEL1-TNFRSF6B	-1.22389	5.2436e-16	1.22031e-14
	RTBDN	-3.36665	2.78787e-21	1.13815e-19
	RSPO3	1.61841	1.21795e-06	7.62113e-06
	RSPO2	-1.05869	0.00274785	0.00819534
	RSPH4A	-3.45464	2.08264e-44	5.21186e-42
	RSPH14	-1.7785	2.5275e-12	3.83041e-11
	RSPH1	-3.09884	4.06699e-34	5.12215e-32
	RSAD2	1.44466	3.49647e-11	4.55238e-10
	RRN3P4	1.07752	4.9366e-06	2.7677e-05
	RRN3P1	-1.06557	5.35667e-13	8.75491e-12
	RRM2P3	-1.63107	5.37789e-09	5.02323e-08
	RPTN	5.1949	8.90356e-23	4.29993e-21
	RPSAP70	-1.46351	9.96177e-10	1.05074e-08
	RPSAP58	-1.9099	1.53223e-10	1.82311e-09
	RPS6KL1	-1.07425	3.95562e-06	2.25344e-05
	RPS3AP40	-1.23724	5.39978e-09	5.04246e-08
	RPS3AP19	-1.24824	4.39367e-09	4.16243e-08
	RPS3AP16	-1.0625	2.56661e-05	0.000124108
	RPS3AP13	-1.03247	2.3219e-08	1.97318e-07
	RPS29P19	-1.25457	0.000634362	0.0022345
	RPS29P11	-3.19354	2.7694e-13	4.69968e-12
	RPS27P25	-1.40208	0.00729801	0.0192484
	RPS27P16	1.73563	1.21046e-08	1.07477e-07
	RPS27AP17	1.43001	2.50555e-05	0.000121522
	RPS27AP13	1.1292	0.00179033	0.00561437
	RPS20P22	-2.19762	4.40262e-10	4.901e-09
	RPRML	-2.92248	7.04016e-07	4.60022e-06
	RPP38-DT	-1.17935	4.41849e-17	1.16235e-15
	RPL7P60	-1.79789	3.98994e-12	5.89151e-11
	RPL7P19	1.11454	0.000257448	0.000993769
	RPL6P7	-2.1836	4.76595e-12	6.97324e-11
	RPL6P6	-1.22128	1.79186e-09	1.80823e-08
	RPL5P30	-1.00658	7.50782e-12	1.0669e-10
	RPL5P2	-1.88668	3.9949e-10	4.48077e-09
	RPL3L	1.40161	2.94819e-13	4.98335e-12
	RPL37P3	1.90845	1.93159e-07	1.39849e-06
	RPL37P1	-1.57437	1.04037e-08	9.3309e-08
	RPL36AP43	-1.01855	2.30879e-09	2.28325e-08
	RPL36AP33	-1.13724	0.00146518	0.00469459
	RPL35AP26	-1.01704	0.00146688	0.00469868
	RPL34P8	-1.95927	1.14962e-06	7.23471e-06
	RPL29P19	3.34976	6.41922e-31	6.35965e-29
	RPL26P30	1.07969	2.11771e-08	1.81043e-07
	RPL26P13	3.04898	1.84661e-20	6.876e-19
	RPL23AP92	-1.02708	1.33601e-05	6.84947e-05
	RPL23AP66	-1.4679	3.9623e-09	3.77978e-08
	RPL23AP49	-1.54644	4.17918e-08	3.41232e-07
	RPL23AP11	1.92831	4.48407e-06	2.53093e-05
	RPL23AP10	-1.17249	1.37663e-05	7.04006e-05
	RPL21P54	-1.70939	4.76555e-11	6.08547e-10
	RPL21P35	-1.00767	0.00122988	0.00402088
	RPL21P32	-1.10846	1.83024e-05	9.16164e-05
	RPL21P2	-1.45157	1.35593e-09	1.39797e-08
	RPL17P15	-1.19472	2.31729e-08	1.97013e-07
	RPL15P21	-2.68354	6.20339e-21	2.45454e-19
	RPL11P1	-1.01125	9.44699e-05	0.000403902
	RPL10P2	-1.2425	4.52494e-07	3.05942e-06
	RPL10P13	1.00344	2.88658e-05	0.000137868
	RPH3AL	-1.01073	2.99706e-07	2.09854e-06
	RPGR	-1.28702	1.05753e-24	6.10125e-23
	RPE65	2.82285	8.35031e-07	5.38419e-06
	RORA	1.0959	3.56481e-11	4.63666e-10
	ROPN1L	-2.67161	2.17862e-17	5.96743e-16
	ROPN1B	-1.7315	1.60157e-09	1.62943e-08
	RNY3P16	1.20381	6.73143e-08	5.29326e-07
	RNY1P16	-1.12073	0.000573222	0.00203983
	RNY1	-1.04376	0.00579609	0.0157495
	RNVU1-32	-4.48252	0.000440088	0.00160977
	RNVU1-29	-1.36719	0.00168226	0.00530981
	RNVU1-2	-1.28156	0.0106979	0.0268659
	RNVU1-19	-1.5076	1.30329e-05	6.6943e-05
	RNU7-186P	-1.26197	0.0159999	0.0379413
	RNU7-141P	-1.13672	0.00211464	0.00650043
	RNU6-944P	-1.63179	0.00111154	0.00367989
	RNU6-930P	-1.3673	4.75296e-06	2.67174e-05
	RNU6-925P	-1.08018	6.37229e-07	4.19367e-06
	RNU6-911P	1.21308	0.000542626	0.00194261
	RNU6-863P	-1.47999	0.0150945	0.0361209
	RNU6-853P	-1.09212	0.000120296	0.000501036
	RNU6-850P	-1.15817	4.02415e-09	3.83498e-08
	RNU6-833P	-2.00916	7.74098e-16	1.7684e-14
	RNU6-703P	-1.0463	6.12168e-05	0.000272738
	RNU6-696P	-2.49253	7.73051e-06	4.1517e-05
	RNU6-658P	-1.01004	3.29919e-06	1.90912e-05
	RNU6-509P	1.37331	0.00248005	0.00748755
	RNU6-450P	-1.14323	0.00343219	0.00996409
	RNU6-418P	-1.09506	5.23225e-07	3.49776e-06
	RNU6-406P	2.0235	0.00828906	0.0215003
	RNU6-30P	-1.0302	3.58105e-07	2.4649e-06
	RNU6-304P	-1.24683	0.00578695	0.0157291
	RNU6-301P	2.37728	7.25417e-06	3.91717e-05
	RNU6-298P	-1.08446	0.000429392	0.00157558
	RNU6-238P	1.81689	0.0176325	0.0412143
	RNU6-218P	-1.02731	0.0163536	0.0386554
	RNU6-167P	4.83688	2.48419e-15	5.33064e-14
	RNU6-160P	1.97206	0.00370034	0.0106297
	RNU6-140P	1.4908	8.74529e-09	7.94893e-08
	RNU6-1161P	1.06185	5.79493e-05	0.000259627
	RNU6-1160P	-1.07236	0.00329747	0.00962007
	RNU6-1098P	-1.0994	0.00341248	0.00991283
	RNU6-1079P	-1.5189	5.49633e-06	3.04869e-05
	RNU6-1065P	-3.31767	7.97223e-05	0.000347087
	RNU6-1064P	-1.47748	0.00521835	0.0144
	RNU6-1061P	-2.8102	0.000212455	0.000834639
	RNU6-1043P	-1.05524	0.0027599	0.00822804
	RNU6-1042P	2.27415	8.144e-06	4.36161e-05
	RNU6-103P	2.47808	0.00676104	0.0180034
	RNU4ATAC12P	-1.26401	0.000415474	0.00152976
	RNU4-8P	-1.12972	4.27113e-05	0.000196943
	RNU4-78P	-1.94639	2.68528e-15	5.73342e-14
	RNU4-53P	-2.75377	3.44266e-15	7.21853e-14
	RNU4-42P	1.62661	0.000338359	0.00127232
	RNU4-29P	-1.86059	3.3288e-05	0.00015687
	RNU4-23P	-1.26306	0.000181361	0.000723597
	RNU4-22P	-1.76278	0.000211049	0.00082996
	RNU2-7P	-1.08226	0.000601815	0.00213174
	RNU1-58P	-2.87738	0.00367233	0.0105626
	RNU1-47P	1.71751	7.54081e-06	4.06114e-05
	RNU1-36P	-1.42886	0.00743742	0.0195786
	RNU1-153P	-1.13134	5.39466e-06	2.99747e-05
	RNFT2	-1.29383	1.964e-10	2.29923e-09
	RNF7P1	-1.53553	2.55963e-08	2.16423e-07
	RNF225	1.70204	1.52257e-09	1.55563e-08
	RNF222	2.90979	2.93721e-30	2.7016e-28
	RNF217-AS1	1.20874	3.05646e-15	6.45087e-14
	RNF217	1.0987	2.55571e-16	6.15975e-15
	RNF213-AS1	-1.44557	1.57524e-19	5.35346e-18
	RNF186	-4.85624	1.79534e-16	4.39305e-15
	RNF183	-2.82461	8.98313e-20	3.14728e-18
	RNF157-AS1	-1.98092	3.82891e-13	6.36044e-12
	RNF157	-2.14903	3.86614e-18	1.14174e-16
	RNF128	-1.64475	1.99864e-05	9.9043e-05
	RNF126P1	-1.89489	7.03943e-08	5.52193e-07
	RNF103	-1.19294	1.97702e-45	5.36565e-43
	RND3	1.29471	2.6448e-21	1.08781e-19
	RND1	-1.40419	2.84675e-10	3.26245e-09
	RNASE7	4.01108	5.44922e-38	9.13077e-36
	RNASE4	-2.24955	7.67566e-30	6.73832e-28
	RNASE3	1.14431	6.22519e-06	3.41415e-05
	RNASE2	1.41111	5.50702e-13	8.98539e-12
	RNASE10	2.25268	2.32664e-12	3.55254e-11
	RNA5SP515	1.79857	0.000232806	0.000907189
	RNA5SP490	-1.01097	0.000227926	0.000889251
	RNA5SP449	1.33884	2.09556e-05	0.000103314
	RNA5SP442	1.22468	0.0015321	0.0048846
	RNA5SP435	-1.06943	0.00789411	0.0206147
	RNA5SP434	-1.24108	0.00588529	0.0159565
	RNA5SP357	-1.95669	0.0211156	0.0481923
	RNA5SP311	-1.29007	1.98121e-05	9.8217e-05
	RNA5SP260	-1.45011	1.33616e-05	6.84947e-05
	RNA5SP221	-1.61657	0.00154991	0.00493613
	RNA5SP187	-1.22061	1.34048e-05	6.87067e-05
	RNA5SP154	1.8313	2.62423e-06	1.54902e-05
	RNA5SP139	-1.35642	0.000333313	0.00125543
	RNA5SP132	-1.20478	0.000855111	0.00290712
	RNA5SP123	-1.12442	0.00626099	0.0168394
	RNA5SP118	-1.44693	0.00339619	0.00987132
	RN7SL8P	-4.1543	2.94292e-15	6.22488e-14
	RN7SL834P	-1.00928	4.34923e-07	2.94526e-06
	RN7SL825P	-1.25418	0.000740641	0.0025641
	RN7SL81P	-1.17251	1.31855e-06	8.19212e-06
	RN7SL812P	-1.02864	0.000524418	0.0018831
	RN7SL803P	-1.23713	0.0133261	0.0324903
	RN7SL753P	-1.11801	0.010003	0.0253157
	RN7SL704P	-1.44994	8.73776e-10	9.32035e-09
	RN7SL619P	-1.11161	0.000150249	0.000610547
	RN7SL541P	-3.06729	1.6014e-08	1.39283e-07
	RN7SL513P	-1.5873	1.26011e-06	7.862e-06
	RN7SL45P	-1.10486	0.0175492	0.0410568
	RN7SL441P	1.00206	3.45915e-05	0.000162556
	RN7SL399P	1.83314	4.12973e-08	3.3748e-07
	RN7SL356P	2.36523	1.22071e-07	9.16699e-07
	RN7SL351P	-1.07144	0.00314814	0.00922631
	RN7SL280P	-1.17823	0.00571931	0.015576
	RN7SL268P	-1.28165	4.63823e-09	4.37155e-08
	RN7SL265P	-1.69755	0.000340476	0.00127878
	RN7SL262P	-1.44604	7.41493e-08	5.78469e-07
	RN7SL250P	-3.33266	0.00230591	0.0070251
	RN7SL151P	1.51659	0.00238748	0.0072444
	RN7SKP275	-3.17994	0.00287194	0.00851596
	RN7SKP214	1.09628	0.00913949	0.02341
	RN7SKP116	2.03084	2.06852e-12	3.17731e-11
	RMST	-2.1053	3.26142e-07	2.26472e-06
	RLN3	-1.37116	0.00215642	0.00661594
	RIT2	-1.05423	5.2481e-06	2.92526e-05
	RIPPLY3	-1.38761	1.3125e-08	1.15802e-07
	RIPPLY2	1.78171	0.000715431	0.00248733
	RIPPLY1	-2.68816	9.34194e-10	9.90997e-09
	RIN1	1.0836	1.95728e-13	3.39936e-12
	RIMS3	1.23977	2.75465e-10	3.16239e-09
	RIMKLA	-1.20068	0.000321225	0.00121322
	RIMBP2	-2.52116	1.37309e-11	1.89465e-10
	RIIAD1	-3.25186	4.28831e-21	1.71617e-19
	RIBC2	-1.12347	2.38162e-11	3.17706e-10
	RIBC1	-1.99588	1.02896e-30	1.00392e-28
	RHPN2	-1.74112	1.53774e-19	5.24451e-18
	RHPN1-AS1	-1.19858	3.94747e-12	5.83103e-11
	RHPN1	-1.42275	7.14015e-15	1.44676e-13
	RHOXF1-AS1	1.34798	0.000789236	0.00271163
	RHOV	2.93931	1.83794e-60	1.26486e-57
	RHOU	-1.60877	3.49378e-13	5.82453e-12
	RHOT1P2	2.02775	6.94544e-07	4.54526e-06
	RHOT1P1	-1.03996	0.0128116	0.0313849
	RHOBTB1	-1.26146	2.34828e-15	5.05023e-14
	RHEX	-2.29204	9.4709e-10	1.0033e-08
	RHCG	4.34203	1.46967e-51	5.89996e-49
	RGS7	-2.99952	3.14289e-11	4.10868e-10
	RGS5	-1.13819	3.07944e-08	2.5727e-07
	RGS22	-1.83278	6.60778e-10	7.18481e-09
	RGS20	2.15571	8.61183e-25	5.01346e-23
	RGS11	-1.27885	1.40205e-05	7.1596e-05
	RGR	-2.39029	4.43094e-09	4.19361e-08
	RGMB-AS1	-1.11094	1.44299e-10	1.72225e-09
	RGL3	-3.03123	1.16652e-18	3.64021e-17
	RFX4	-2.06138	2.97153e-09	2.88608e-08
	RFX3	-1.41679	1.35215e-20	5.13912e-19
	RFLNA	-2.12377	1.01922e-08	9.15614e-08
	RFK	-1.11761	2.94464e-13	4.97953e-12
	RETREG1	-1.64941	6.11721e-14	1.11466e-12
	REPS2	-1.44146	3.38661e-19	1.12031e-17
	REN	-1.65127	2.1627e-08	1.84562e-07
	RELN	-1.94258	4.35439e-11	5.5882e-10
	REG4	-6.12915	1.13205e-102	1.45428e-98
	REG1B	-7.01024	4.37952e-07	2.96474e-06
	REG1A	-6.12518	8.34636e-19	2.64741e-17
	REEP4	1.12376	2.02463e-34	2.61836e-32
	REC8	-1.51816	1.11615e-10	1.35695e-09
	RDM1P3	-1.03993	3.03674e-07	2.12439e-06
	RDH5	-1.65698	7.54762e-27	5.31769e-25
	RDH16	3.0724	4.38729e-34	5.50755e-32
	RDH12	3.0707	1.02164e-20	3.9531e-19
	RD3	-1.78238	3.3736e-09	3.24632e-08
	RCOR2	-1.0729	9.69225e-05	0.00041306
	RCC2P6	-2.42517	6.97768e-31	6.87756e-29
	RBPMSLP	-1.11262	0.000694818	0.00242529
	RBPMS	-1.2568	2.9566e-12	4.43363e-11
	RBP7	1.60248	2.34225e-11	3.12671e-10
	RBP4	-2.58722	1.41491e-05	7.21668e-05
	RBP2	-2.50162	8.9352e-05	0.00038428
	RBP1	1.04228	9.55624e-06	5.04297e-05
	RBM47	-1.24154	6.25527e-24	3.37636e-22
	RBM24	-1.58386	1.79652e-07	1.31104e-06
	RBM11	1.1527	0.000135203	0.000555344
	RAX	-2.80455	7.11648e-08	5.57789e-07
	RASSF6	-1.24865	1.87359e-07	1.36084e-06
	RASSF5	1.03098	4.91955e-15	1.01605e-13
	RASSF10	1.2875	9.31126e-10	9.88014e-09
	RASL11B	1.38974	3.28077e-06	1.89989e-05
	RASL11A	-1.5401	4.91584e-13	8.09276e-12
	RASL10B	-1.11011	0.000110221	0.00046348
	RASL10A	-1.52589	1.84584e-14	3.54798e-13
	RASGRP1	1.48561	9.78301e-16	2.2126e-14
	RASD1	-2.51712	7.36548e-16	1.68762e-14
	RARRES2P1	-1.88556	2.51972e-05	0.000122071
	RARRES1	-1.72715	3.00428e-06	1.75454e-05
	RARG	1.31794	3.74645e-43	8.34592e-41
	RAPGEFL1	1.05916	8.01842e-09	7.32974e-08
	RAPGEF3	-1.03641	8.43114e-07	5.43085e-06
	RAP2CP1	-1.42947	1.37529e-06	8.51854e-06
	RAP2B	1.16031	4.47102e-21	1.78558e-19
	RAP1GAP2	-1.01989	1.02029e-09	1.07435e-08
	RAP1GAP	-2.59381	2.37106e-31	2.43675e-29
	RANBP17	-1.5622	6.32232e-15	1.28987e-13
	RAMP1	-1.32654	1.38726e-06	8.58855e-06
	RAMACL	1.09361	1.72476e-08	1.49372e-07
	RALYL	-3.61329	0.0117309	0.0290831
	RALGAPA2	-1.10789	3.19039e-15	6.71149e-14
	RAI2	-1.14713	2.23859e-06	1.34089e-05
	RAET1L	1.64644	4.68039e-08	3.77675e-07
	RAET1G	2.98832	2.63222e-33	3.1504e-31
	RAET1E	3.08642	5.18003e-38	8.7176e-36
	RAD51AP2	2.55083	1.778e-25	1.10699e-23
	RAD1P2	3.98588	7.17433e-21	2.81559e-19
	RAD17P1	-2.73669	1.21268e-14	2.39044e-13
	RAB7B	2.27576	7.64438e-30	6.72618e-28
	RAB38	2.0617	4.68532e-26	3.06047e-24
	RAB37	-1.24628	1.7203e-09	1.74196e-08
	RAB36	-1.77495	5.25859e-17	1.36748e-15
	RAB31	1.34805	1.74243e-20	6.51956e-19
	RAB26	-1.09475	3.55424e-06	2.04047e-05
	RAB20	-1.3637	4.02032e-14	7.47054e-13
	RAB19	-1.22271	4.51208e-08	3.65702e-07
	RAB17	-2.1933	7.51328e-16	1.71842e-14
	RAB11FIP4	-1.18588	4.93905e-18	1.4435e-16
	R3HDML	-2.40545	0.000200218	0.000791324
	QRFPR	2.9842	8.06767e-22	3.52917e-20
	QPRT	-2.4106	2.24712e-14	4.28298e-13
	QPCT	-1.54273	5.14456e-10	5.6761e-09
	PYY2	1.40719	3.32974e-05	0.000156895
	PYY	-2.12946	6.87899e-19	2.20191e-17
	PYROXD2	-1.14245	1.28782e-09	1.33669e-08
	PYHIN1	1.05489	1.81773e-07	1.32477e-06
	PYGL	1.97246	2.85581e-34	3.65648e-32
	PYDC1	2.44963	2.00647e-05	9.94054e-05
	PYCR1	-1.07129	1.57386e-10	1.86976e-09
	PWAR5	-1.00541	0.00135611	0.00438118
	PVALEF	-1.03442	0.000104854	0.000443282
	PUDPP2	2.28938	2.43929e-09	2.39939e-08
	PTX4	2.56805	1.09692e-07	8.29716e-07
	PTPRZ1	1.66792	1.24312e-07	9.32258e-07
	PTPRR	-1.90879	2.40354e-07	1.7141e-06
	PTPRQ	2.36649	3.29052e-13	5.51124e-12
	PTPRN2	-1.48295	3.76361e-11	4.87057e-10
	PTPRJ	-1.24116	3.65471e-17	9.70702e-16
	PTPRH	-1.7973	4.94116e-13	8.13097e-12
	PTPRG	-1.30579	1.36361e-10	1.63205e-09
	PTPRD	-1.68002	1.79017e-06	1.08957e-05
	PTPN13	1.21542	7.85079e-14	1.42181e-12
	PTP4A3	-1.21463	3.38704e-13	5.66058e-12
	PTMAP3	-1.23668	1.74239e-11	2.37446e-10
	PTHLH	3.10172	3.33021e-23	1.68429e-21
	PTH2	-2.01156	0.00870194	0.0224114
	PTGS1	2.36248	3.8968e-25	2.34288e-23
	PTGFR	1.08623	0.0214833	0.0489155
	PTGES2-AS1	-1.57264	6.21664e-13	1.00835e-11
	PTENP1-AS	1.19315	0.00509563	0.0140941
	PTCSC3	-1.78205	0.000474234	0.00171949
	PTCSC2	1.14112	0.000722101	0.00250757
	PTCRA	1.02389	2.65279e-05	0.000127953
	PTCHD1	-1.08039	0.00172788	0.00543686
	PTCH2	-1.10289	7.74375e-10	8.33156e-09
	PTBP1P	-1.45901	4.06307e-10	4.54929e-09
	PSTPIP2	1.08732	1.26512e-14	2.4863e-13
	PSTPIP1	1.10464	8.8119e-11	1.08742e-09
	PSPC1P1	1.67936	6.32934e-11	7.94807e-10
	PSORS1C3	-1.70538	8.71342e-06	4.63757e-05
	PSORS1C2	3.97491	5.08965e-25	3.02234e-23
	PSG6	4.65942	0.00125332	0.00408922
	PSG5	4.2484	9.479e-12	1.33374e-10
	PSG4	3.50079	4.41239e-17	1.16154e-15
	PSG1	1.47457	0.000560378	0.00199893
	PSD2	-1.14042	1.20306e-06	7.53773e-06
	PSCA	-1.16688	0.00126326	0.0041178
	PSAPL1	3.38715	2.58218e-18	7.73228e-17
	PRXL2B	-1.27759	9.33197e-19	2.95275e-17
	PRUNE2	-1.76935	7.96536e-13	1.2796e-11
	PRTG	-1.78457	4.16675e-10	4.65456e-09
	PRSS51	-1.60922	7.27167e-08	5.69021e-07
	PRSS46P	-1.7059	2.79595e-06	1.64283e-05
	PRSS45P	-1.40043	5.18441e-05	0.000234537
	PRSS44P	-1.40241	3.64356e-06	2.08709e-05
	PRSS41	-2.82418	0.000142408	0.000581999
	PRSS3P4	2.03092	1.48534e-08	1.29921e-07
	PRSS35	-1.03548	0.000166304	0.000669227
	PRSS33	-3.83756	1.14331e-19	3.96956e-18
	PRSS3	-2.07414	2.88468e-05	0.000137795
	PRSS29P	-2.21139	6.69314e-10	7.26816e-09
	PRSS27	2.88971	2.30173e-29	1.97125e-27
	PRSS2	-6.20179	8.03406e-15	1.61684e-13
	PRSS1	-5.04158	9.95187e-22	4.31909e-20
	PRRT4	1.81405	1.32769e-12	2.08338e-11
	PRRT3	-1.25801	4.98319e-12	7.26625e-11
	PRRG4	1.07506	1.2435e-17	3.51086e-16
	PRR9	7.87915	3.20463e-25	1.948e-23
	PRR36	-2.27708	3.996e-13	6.62659e-12
	PRR32	1.21256	8.23558e-05	0.00035698
	PRR29-AS1	-1.58897	1.56015e-12	2.42936e-11
	PRR29	-2.73293	7.29945e-36	1.05361e-33
	PRR26	-4.04383	6.7176e-44	1.56903e-41
	PRR20G	1.23068	0.00149539	0.00477867
	PRR15L	-2.75711	1.92763e-22	8.97208e-21
	PRR15	-2.62208	4.62472e-18	1.35641e-16
	PROSER2-AS1	1.28998	7.89695e-07	5.11068e-06
	PROM2	1.19494	1.97306e-15	4.28877e-14
	PROM1	-3.87355	5.35268e-16	1.24419e-14
	PROK1	-1.84776	8.63759e-07	5.55455e-06
	PROCR	1.03013	2.76321e-08	2.32514e-07
	PROC	-1.85016	1.13119e-11	1.57781e-10
	PRNP	1.91417	2.03152e-37	3.28962e-35
	PRLR	-1.62557	4.21747e-07	2.86611e-06
	PRLH	-3.28692	1.57434e-07	1.16189e-06
	PRKCG	-2.12936	2.26877e-05	0.000111087
	PRKCA	-1.47869	2.25925e-20	8.31609e-19
	PRKAB1	-1.14925	3.50947e-24	1.9377e-22
	PRKAA2	-1.52424	6.15584e-07	4.06233e-06
	PRIMA1	2.01753	1.29893e-15	2.88195e-14
	PRF1	1.21899	1.18661e-08	1.05541e-07
	PREX2	-1.99028	2.21462e-16	5.36114e-15
	PRELID3BP11	-1.20406	0.000164836	0.000664013
	PRELID2P1	1.79813	2.50934e-09	2.46389e-08
	PRDM16-DT	-1.9853	1.37277e-06	8.50564e-06
	PRDM16	-2.2768	1.59125e-14	3.08477e-13
	PRDM13	1.56586	7.42437e-12	1.0566e-10
	PRDM1	1.06492	2.57353e-14	4.86898e-13
	PRAP1	-2.93189	5.00331e-28	3.86418e-26
	PRAME	-2.2169	5.32106e-05	0.000240183
	PRAC2	-1.28881	0.0203292	0.0466071
	PRAC1	-1.01434	0.000134955	0.000554423
	PPP4R4	1.33705	4.86473e-06	2.72939e-05
	PPP2R3A	1.62454	1.64212e-30	1.57427e-28
	PPP2R2C	1.51445	9.78707e-08	7.47194e-07
	PPP2R2B	1.85126	4.06942e-12	5.99967e-11
	PPP1R9A	-3.11896	1.60598e-16	3.94223e-15
	PPP1R42	-2.2203	2.01454e-13	3.48936e-12
	PPP1R3C	1.34164	5.71657e-08	4.54812e-07
	PPP1R36	-2.20999	7.60345e-23	3.6952e-21
	PPP1R1C	1.29821	4.19949e-07	2.8544e-06
	PPP1R1B	-4.20136	1.79854e-20	6.71645e-19
	PPP1R1A	-1.62962	1.06e-06	6.72562e-06
	PPP1R18	1.11993	1.62607e-24	9.21575e-23
	PPP1R17	-1.93182	0.0179334	0.0418033
	PPP1R14D	-3.62526	2.57336e-20	9.40045e-19
	PPP1R13L	1.39357	4.62475e-30	4.21355e-28
	PPP1R11P1	1.31344	0.0084388	0.0218256
	PPM1J	1.12188	8.73632e-17	2.21215e-15
	PPM1H	-2.42761	2.58982e-21	1.06634e-19
	PPM1E	-1.44532	4.6093e-10	5.11335e-09
	PPL	1.16083	2.19242e-13	3.77373e-12
	PPIL6	-2.59959	3.22391e-32	3.49007e-30
	PPIAP91	-1.0547	2.22146e-05	0.000109047
	PPIAP77	1.02857	9.11634e-06	4.83266e-05
	PPIAP45	1.76485	7.66995e-17	1.95886e-15
	PPIAP28	1.92709	3.21191e-10	3.64606e-09
	PPIAP26	2.58114	2.17876e-16	5.28096e-15
	PPIAP20	-1.14459	0.00257872	0.00775265
	PPDPFL	1.28091	0.00248651	0.00750531
	PPBP	-3.17236	0.00460813	0.0128924
	PPARG	-1.82609	6.80071e-11	8.49847e-10
	POU5F1B	-1.15708	0.0059757	0.0161698
	POU5F1	-1.24896	3.59039e-09	3.43691e-08
	POU3F3	-3.39167	0.00281016	0.00836363
	POU3F1	4.54616	1.83698e-54	8.74019e-52
	PON1	-2.44355	0.00468528	0.0130892
	POMC	1.52763	3.20984e-06	1.86189e-05
	POLR3GP1	-2.05959	5.35416e-10	5.89049e-09
	POLR2J3	1.11736	1.14623e-09	1.19877e-08
	PODXL	-1.72746	4.68049e-23	2.3275e-21
	PODNL1	1.32714	1.70398e-12	2.64265e-11
	POC1B-AS1	-1.24128	2.55958e-23	1.31001e-21
	POC1B	-1.0114	3.63185e-25	2.19385e-23
	PNPLA7	-1.68423	1.6744e-22	7.87896e-21
	PNPLA1	1.92856	4.75934e-18	1.39271e-16
	PNMT	-8.14121	3.5355e-40	6.56966e-38
	PNMA8C	-2.13388	1.46143e-09	1.49793e-08
	PNMA8A	-2.05859	8.69813e-09	7.9098e-08
	PNMA6B	-2.37164	0.000111308	0.000467591
	PNMA6A	-3.11137	8.02268e-23	3.88913e-21
	PNMA5	1.94076	2.34737e-07	1.67746e-06
	PNMA3	-1.13802	0.00164994	0.00521847
	PNMA2	-3.26576	2.76171e-21	1.12987e-19
	PNLIPRP3	6.3922	3.42368e-20	1.23892e-18
	PNLIPRP2	-2.45901	0.00098918	0.00331392
	PNLDC1	1.47019	5.81649e-15	1.19108e-13
	PNKD	-1.28372	2.91503e-19	9.668e-18
	PNCK	1.88223	3.63699e-22	1.64321e-20
	PLXNA4	-2.48334	4.58697e-14	8.45419e-13
	PLUT	-3.28063	2.33789e-09	2.30907e-08
	PLSCR4	1.02481	1.08887e-09	1.1428e-08
	PLS1	-2.02469	1.99402e-26	1.35533e-24
	PLPPR3	-2.42287	0.00182586	0.00571159
	PLPP5	-1.18475	1.86655e-25	1.15465e-23
	PLN	1.1837	6.24054e-05	0.000277462
	PLLP	-1.08063	4.21019e-08	3.43473e-07
	PLIN5	-1.92129	1.83038e-11	2.4891e-10
	PLEKHS1	-3.67997	1.98013e-18	6.03259e-17
	PLEKHN1	1.56171	1.80253e-19	6.09364e-18
	PLEKHH2	-1.80003	3.40886e-13	5.68965e-12
	PLEKHG7	-1.26066	0.000109493	0.000460771
	PLEKHD1	-1.4598	5.26485e-06	2.93338e-05
	PLEKHB1	-2.8375	4.59283e-28	3.55428e-26
	PLEKHA6	-1.96741	2.66487e-17	7.18694e-16
	PLD4	1.11835	3.14042e-08	2.61684e-07
	PLD1	1.04377	1.01191e-12	1.61148e-11
	PLCL2	-2.10849	6.17076e-33	7.1202e-31
	PLCH2	2.15546	2.518e-26	1.69357e-24
	PLCH1-AS1	-1.62339	6.42113e-07	4.22366e-06
	PLCH1	-3.72771	7.33688e-30	6.48523e-28
	PLCE1-AS1	-1.39408	8.40439e-08	6.50004e-07
	PLCE1	-1.01742	1.4314e-07	1.06229e-06
	PLCB4	-2.12802	6.15411e-10	6.7233e-09
	PLAU	1.58966	1.58279e-18	4.86825e-17
	PLAT	1.28878	1.21202e-07	9.10706e-07
	PLAC4	-3.44855	3.3085e-08	2.74588e-07
	PLAAT3	-1.96284	1.25337e-13	2.21577e-12
	PLAAT2	-1.36646	5.18578e-05	0.000234571
	PLA2G6	-1.16603	1.53647e-16	3.78365e-15
	PLA2G4F	1.34195	1.73031e-07	1.26897e-06
	PLA2G4E-AS1	2.18224	2.26208e-18	6.81612e-17
	PLA2G4E	4.96948	2.33635e-47	7.44136e-45
	PLA2G4D	3.59499	4.26201e-18	1.25384e-16
	PLA2G2F	2.53754	2.84581e-12	4.27748e-11
	PLA2G2A	1.3209	0.000915926	0.00309122
	PLA2G1B	-1.42058	1.06854e-05	5.58985e-05
	PLA2G12B	-3.3188	2.58989e-08	2.18741e-07
	PLA2G10	-2.23874	1.54e-09	1.57136e-08
	PLA1A	-2.08635	1.13318e-16	2.84321e-15
	PKP1	4.63081	5.04098e-69	6.26692e-66
	PKNOX2	-2.80098	7.20896e-19	2.29798e-17
	PKN1	-1.08829	1.36893e-08	1.20368e-07
	PKHD1L1	-2.98874	1.47404e-15	3.24989e-14
	PKHD1	-2.97441	8.22011e-13	1.31998e-11
	PKDCC	-2.61261	1.01545e-15	2.29392e-14
	PIWIL4	-2.02328	2.49577e-25	1.52917e-23
	PIWIL1	-3.15875	1.68134e-09	1.70563e-08
	PITX3	1.38294	7.73999e-09	7.09374e-08
	PITX2	1.57033	3.17333e-05	0.000150129
	PITX1	1.90331	8.93429e-25	5.19334e-23
	PIRT	-2.75641	3.06056e-09	2.96807e-08
	PIR	1.26402	1.63384e-13	2.85951e-12
	PIPOX	-1.41239	2.00371e-14	3.83421e-13
	PIP5K1B	-2.80215	1.61411e-25	1.0082e-23
	PINCR	1.33251	0.00167342	0.00528406
	PIMREGP2	-1.64277	0.000465675	0.0016918
	PIM1	1.16715	1.35906e-19	4.68174e-18
	PIK3CD	1.02839	3.91792e-19	1.28724e-17
	PIH1D2	-1.52147	4.26427e-28	3.31332e-26
	PIGR	-5.39974	1.69479e-34	2.22162e-32
	PIFO	-3.46312	3.85898e-21	1.55566e-19
	PICSAR	2.96007	1.92107e-22	8.95238e-21
	PI3	2.1406	1.64752e-09	1.67397e-08
	PI16	1.46117	0.000107653	0.000453773
	PHYHD1	-1.50667	5.10422e-07	3.41869e-06
	PHYH	-2.22982	1.28718e-43	2.97046e-41
	PHLDB2	1.77585	3.58986e-21	1.45325e-19
	PHLDA3	1.21528	2.09555e-21	8.71204e-20
	PHGR1	-5.31727	3.06559e-15	6.4666e-14
	PHF5GP	-1.12786	0.00194019	0.00602959
	PHF2P2	-1.19705	0.00386156	0.0110311
	PHF21B	-1.4477	2.33285e-05	0.000113949
	PHEX	-1.00022	1.88408e-05	9.39578e-05
	PHBP13	-1.83143	1.05511e-07	8.0171e-07
	PHACTR3	-1.72768	1.7371e-13	3.02923e-12
	PGR	-1.4772	5.02867e-14	9.25059e-13
	PGPEP1L	-1.66718	3.28592e-10	3.72569e-09
	PGPEP1	-1.74839	5.96473e-32	6.31524e-30
	PGM5P3-AS1	1.06186	0.00507527	0.0140484
	PGM5	-1.47963	1.06341e-05	5.56606e-05
	PGM2	1.26917	3.01301e-30	2.76472e-28
	PGLYRP4	3.82527	3.44179e-37	5.45857e-35
	PGLYRP3	6.0616	1.60375e-65	1.43737e-62
	PGGHG	-1.47296	6.26586e-10	6.82919e-09
	PGF	1.08429	5.5901e-18	1.62594e-16
	PGC	-6.36419	2.35866e-12	3.59575e-11
	PGBD5	1.39681	1.40971e-07	1.0472e-06
	PGAP6	-1.15352	3.75856e-24	2.0693e-22
	PGAP3	-1.19179	4.2746e-27	3.05638e-25
	PFN1P6	-1.43451	1.16576e-08	1.0383e-07
	PFKFB2	-1.58656	1.71354e-27	1.26996e-25
	PF4V1	-1.72057	0.00159383	0.00505845
	PF4	-1.2898	0.0108904	0.0272911
	PERP	1.9755	4.59137e-39	8.04304e-37
	PERM1	1.45687	2.38055e-17	6.49286e-16
	PEG3	-1.32347	5.28347e-13	8.64995e-12
	PEG10	-1.73625	2.37101e-05	0.000115652
	PECR	-1.72807	7.06685e-30	6.2609e-28
	PDZK1	-2.60136	5.28267e-13	8.64995e-12
	PDZD3	-4.78663	1.04951e-51	4.34915e-49
	PDXDC1	-1.18022	2.90065e-36	4.28308e-34
	PDX1	-3.49229	1.12792e-07	8.51396e-07
	PDPN	2.05965	8.66647e-14	1.55855e-12
	PDK4	-2.881	1.02273e-24	5.90928e-23
	PDGFC	-1.53152	1.33201e-12	2.0893e-11
	PDE9A	-1.19326	3.40184e-06	1.96175e-05
	PDE8B	-1.17909	2.8909e-09	2.81131e-08
	PDE6B-AS1	-1.36766	9.47905e-05	0.000405138
	PDE6B	-1.02463	0.000113235	0.000474777
	PDE6A	1.1426	0.00483513	0.0134601
	PDE4C	-2.36835	1.67642e-22	7.87896e-21
	PDE3A	-1.66053	2.0615e-06	1.24138e-05
	PDE2A-AS2	3.10763	9.29042e-24	4.97283e-22
	PDE2A	1.03015	3.3958e-09	3.26605e-08
	PDE11A	-1.83611	5.81053e-11	7.31804e-10
	PDCL3P4	-1.15234	3.20447e-09	3.09361e-08
	PDCD6IPP2	-1.28848	9.70468e-08	7.41205e-07
	PDCD1LG2	1.68766	2.20014e-18	6.64204e-17
	PCSK1N	-2.35112	4.03381e-08	3.29921e-07
	PCSK1	1.0166	7.97892e-08	6.1896e-07
	PCP4L1	3.99244	5.78139e-29	4.7979e-27
	PCP4	-2.01703	2.49854e-05	0.000121243
	PCOLCE2	1.01013	0.00118199	0.00388277
	PCNPP3	2.2347	2.07536e-08	1.7766e-07
	PCK1	-3.75248	4.2331e-11	5.44524e-10
	PCDHGC5	1.55466	9.04357e-10	9.62259e-09
	PCDHGC3	1.02393	2.52004e-06	1.49185e-05
	PCDHGB2	1.39021	2.22271e-06	1.33221e-05
	PCDHB2	-1.41139	0.000394392	0.00145882
	PCDHB1	-1.35731	1.20913e-07	9.08707e-07
	PCDHAC2	-3.13638	1.65822e-14	3.20172e-13
	PCDHAC1	-3.5412	5.12442e-16	1.19401e-14
	PCDHA8	-1.24031	7.03978e-09	6.47199e-08
	PCDHA7	-1.63535	1.07339e-09	1.12687e-08
	PCDHA6	-2.17437	2.84689e-10	3.26245e-09
	PCDHA5	-1.81797	3.96466e-08	3.24887e-07
	PCDHA4	-1.67018	4.44229e-05	0.000203932
	PCDHA3	-1.83658	1.60627e-08	1.39675e-07
	PCDHA2	-1.8057	1.00196e-07	7.64192e-07
	PCDHA13	-2.04715	1.92941e-08	1.65865e-07
	PCDHA12	-3.38464	8.82715e-12	1.2452e-10
	PCDHA11	-2.30547	2.32801e-06	1.38798e-05
	PCDHA10	-2.34166	1.84524e-16	4.5123e-15
	PCDHA1	-1.40876	9.65167e-05	0.000411785
	PCDH8	1.52819	2.10597e-07	1.51534e-06
	PCDH20	-1.00577	7.22589e-05	0.000317246
	PCAT5	-1.1423	1.59788e-06	9.7918e-06
	PCAT18	-1.28534	3.33968e-06	1.92965e-05
	PCAT14	-2.68135	1.44299e-06	8.91064e-06
	PCARE	1.96311	6.02932e-24	3.25896e-22
	PBLD	-2.15598	2.57822e-47	8.14442e-45
	PAX8-AS1	1.58432	2.61298e-10	3.01141e-09
	PAX8	-3.56547	8.67366e-26	5.57123e-24
	PAX6	-1.26146	1.2737e-09	1.32275e-08
	PAX5	1.12702	7.12304e-06	3.85392e-05
	PAX4	-2.47712	0.00145943	0.00467812
	PAX3	1.31732	4.25244e-07	2.88835e-06
	PAX2	-4.26563	2.18417e-12	3.34297e-11
	PATZ1	-1.04846	1.2586e-16	3.1395e-15
	PART1	-1.29358	0.00315149	0.00923544
	PARM1	-1.07253	1.44566e-05	7.36573e-05
	PARD6G	2.30432	2.08478e-45	5.61855e-43
	PARD6B	-1.31151	3.75681e-23	1.89013e-21
	PARD6A	-1.005	2.73306e-08	2.30379e-07
	PARD3B	-1.47513	1.87344e-11	2.54137e-10
	PAPSS2	-1.36537	3.08583e-12	4.61485e-11
	PAMR1	-1.00185	0.000342108	0.00128454
	PALM3	-2.53553	5.6782e-11	7.16777e-10
	PAK6	1.33687	7.16511e-22	3.15945e-20
	PADI3	1.68634	5.68394e-11	7.17268e-10
	PADI2	-1.49059	1.45124e-08	1.27141e-07
	PACSIN1	-2.02773	4.09073e-12	6.02647e-11
	PACRG-AS1	-1.27078	9.96552e-05	0.000423488
	PACRG	-2.75879	5.17429e-16	1.20491e-14
	PACERR	-1.06537	0.000480872	0.00174225
	PABPC1L	-1.02211	1.33001e-11	1.84114e-10
	P4HTM	-1.22881	3.43252e-23	1.73149e-21
	P3H2-AS1	2.10524	6.19125e-10	6.76125e-09
	P3H2	2.18838	1.74224e-18	5.33738e-17
	P2RY2	1.04273	4.30533e-11	5.53446e-10
	P2RY12	1.21005	1.1368e-06	7.15971e-06
	P2RY1	2.56387	3.95568e-26	2.61938e-24
	P2RX7	1.27333	6.10709e-13	9.92247e-12
	P2RX6	1.23862	1.46328e-10	1.74484e-09
	P2RX4	-1.00251	8.08642e-14	1.46311e-12
	P2RX2	-1.1356	0.0161781	0.0382885
	OXTR	-1.62921	1.39784e-15	3.08718e-14
	OXGR1	-1.12913	0.00822511	0.0213704
	OXER1	-1.00869	9.55193e-06	5.04208e-05
	OVOL1-AS1	1.31197	1.04991e-09	1.10492e-08
	OVOL1	1.42604	1.12792e-15	2.52639e-14
	OVCH2	2.19249	6.91048e-10	7.49361e-09
	OVAAL	-1.58216	0.00648582	0.0173726
	OTX2-AS1	-3.47705	0.00461733	0.0129144
	OTP	-1.21346	0.000101651	0.000430878
	OTOS	-6.47422	7.56959e-11	9.40743e-10
	OTOP3	3.8617	4.92057e-19	1.60028e-17
	OTOP2	2.27686	1.64224e-14	3.17722e-13
	OSGIN1	1.32412	2.15185e-09	2.14234e-08
	OSCP1	-1.01212	2.25238e-11	3.01405e-10
	OSBPL6	1.15494	6.4697e-08	5.09681e-07
	OSBPL10	-1.32305	1.10499e-18	3.46221e-17
	OSBP2	1.12724	7.17613e-07	4.68192e-06
	ORM2	-2.09628	4.70749e-07	3.16839e-06
	ORM1	-1.81451	0.00103014	0.00343727
	ORAOV1P1	-2.43922	2.05661e-11	2.76842e-10
	ORAI2	-1.06995	7.08498e-13	1.1415e-11
	OR8R1P	1.1765	2.28472e-07	1.63633e-06
	OR7E99P	-1.74291	0.000456635	0.00166259
	OR7E85P	-1.6972	0.0107654	0.0270215
	OR7E62P	2.45514	1.78713e-20	6.68035e-19
	OR7E47P	-1.9759	4.06906e-11	5.24649e-10
	OR7E28P	1.23414	1.60119e-05	8.09607e-05
	OR7E22P	-1.57823	4.46625e-06	2.52198e-05
	OR7E122P	-2.08538	2.75189e-08	2.31779e-07
	OR7E102P	-1.54889	1.46205e-08	1.27972e-07
	OR7A1P	2.49112	2.7444e-05	0.000131747
	OR5E1P	1.50458	5.90585e-07	3.91411e-06
	OR52V1P	-1.02957	0.000688833	0.00240658
	OR52E8	4.73962	0.00499099	0.0138479
	OR51E1	-1.00721	0.000123744	0.000513291
	OR2W3	1.43363	1.06788e-05	5.58716e-05
	OR2A4	-1.38517	0.00544762	0.0149438
	OR13Z2P	-1.61946	0.00251656	0.00758532
	OR13J1	-1.64479	1.88478e-09	1.8921e-08
	OR11H13P	-1.09337	0.0075837	0.0199134
	OR10H1	1.95553	6.44928e-08	5.0828e-07
	OR10A3	1.51446	2.54563e-05	0.000123202
	OPTC	-2.3178	2.34575e-06	1.39726e-05
	OPRK1	-2.10304	0.000785487	0.00269958
	OPRD1	-1.4509	6.41008e-10	6.98045e-09
	OPN4	-1.23542	1.88038e-05	9.38217e-05
	ONECUT2	-3.23227	4.51087e-23	2.25187e-21
	OMP	-3.08092	1.49629e-28	1.19638e-26
	OMG	-2.35722	9.37273e-10	9.93715e-09
	OLR1	2.32937	4.331e-16	1.01838e-14
	OLIG3	-2.70351	0.00557231	0.0152328
	OLFML2A	1.9383	3.20951e-26	2.14742e-24
	OIT3	-1.63683	1.33653e-14	2.61996e-13
	OFCC1	1.40955	4.55108e-07	3.07547e-06
	ODAPH	2.44429	1.53436e-13	2.69275e-12
	OCLN	-1.34212	1.27241e-14	2.49935e-13
	OCEL1	-1.02616	1.5756e-15	3.46193e-14
	OCA2	1.26517	0.00111761	0.00369714
	OASL	1.10325	9.70477e-08	7.41205e-07
	OAS2	1.19329	4.57515e-12	6.70679e-11
	NXPH4	1.25447	9.77086e-10	1.03191e-08
	NXPH2	2.08862	0.000251305	0.000972785
	NXPE2	-3.0227	1.89093e-09	1.89678e-08
	NXPE1	-5.00111	1.40211e-16	3.46384e-15
	NXNL2	-2.48431	1.37793e-20	5.22678e-19
	NXF3	-2.28355	2.13653e-08	1.8245e-07
	NWD1	-1.30711	6.56232e-05	0.000290395
	NUS1P2	-3.08804	1.67571e-09	1.70037e-08
	NUPR1	1.1753	1.69795e-10	2.00544e-09
	NUDT11	1.5357	9.18655e-08	7.06245e-07
	NUCB2	-1.34043	1.14336e-22	5.46021e-21
	NTSR2	1.28025	8.9849e-05	0.000386073
	NTS	5.59237	7.95684e-21	3.11003e-19
	NTRK2	2.93416	6.58693e-20	2.33536e-18
	NTF4	2.41828	6.46118e-31	6.38481e-29
	NTAN1P3	-1.2181	0.0068656	0.0182491
	NT5CP1	-1.30875	1.34506e-09	1.38825e-08
	NSUN7	-1.67999	3.72423e-16	8.82755e-15
	NSG1	2.38561	6.94259e-17	1.78493e-15
	NRXN2	-1.01335	0.00017022	0.000683631
	NRGN	-1.34546	2.73214e-12	4.11948e-11
	NRG4	1.24226	7.44971e-08	5.81065e-07
	NRG3	-2.31752	1.65956e-14	3.20269e-13
	NRG1	1.95004	3.51905e-13	5.86341e-12
	NRAD1	-1.27039	0.0170955	0.040149
	NR5A2	-1.6652	1.93471e-21	8.08694e-20
	NR5A1	3.36363	0.0129911	0.0317806
	NR4A1AS	-1.59902	3.42405e-08	2.8354e-07
	NR4A1	-1.62702	8.19086e-10	8.77342e-09
	NR3C2	-1.43028	1.07751e-06	6.82852e-06
	NR2F2-AS1	-1.80871	2.78985e-14	5.26018e-13
	NR2F2	-1.60874	2.24299e-19	7.5233e-18
	NR2F1	-1.03743	4.01172e-05	0.000186137
	NR2E3	-1.3095	2.0815e-11	2.79801e-10
	NR2E1	-1.65717	0.000649077	0.00228029
	NR1I2	-4.87755	3.13337e-42	6.67166e-40
	NR1H4	-4.28866	2.49105e-05	0.000120941
	NR0B2	-4.2228	3.00171e-28	2.36088e-26
	NR0B1	-2.98552	4.77653e-16	1.11768e-14
	NPY	-1.78565	0.00142263	0.00457384
	NPW	-1.26788	0.000354523	0.00132573
	NPTXR	-1.448	1.46718e-07	1.08738e-06
	NPTX2	-2.318	1.82861e-08	1.57799e-07
	NPTX1	2.28224	2.13244e-09	2.12412e-08
	NPR1	-2.3924	1.46214e-20	5.52988e-19
	NPPC	2.17301	2.21324e-06	1.32695e-05
	NPM1P32	-1.08432	5.4496e-08	4.34739e-07
	NPL	1.42133	4.67085e-23	2.32571e-21
	NPIPB14P	-1.05959	1.43172e-09	1.47021e-08
	NPHP1	-1.80964	2.35662e-21	9.73438e-20
	NPFFR1	-1.51629	5.01768e-08	4.03035e-07
	NPDC1	-1.81575	1.84428e-22	8.61534e-21
	NPC1L1	-3.72567	1.13515e-27	8.59479e-26
	NPAS3	-3.15504	1.06496e-26	7.4487e-25
	NOXA1	-1.14141	5.30131e-10	5.83735e-09
	NOX1	-2.05589	8.38714e-09	7.65228e-08
	NOVA1	-1.33829	3.45396e-06	1.98853e-05
	NOTUM	2.89938	0.00380014	0.010875
	NOTCH3	1.48945	1.6768e-26	1.14174e-24
	NOTCH1	1.07325	2.70654e-16	6.51106e-15
	NOSTRIN	-1.69864	3.02226e-21	1.23124e-19
	NOS2P3	-1.36228	2.47871e-06	1.46942e-05
	NOS2P2	-1.2034	0.00369402	0.0106147
	NOL4L	-1.95598	5.789e-29	4.7979e-27
	NOL4	-2.85081	2.64177e-16	6.35921e-15
	NOG	-1.33809	1.97387e-06	1.19252e-05
	NODAL	1.21871	4.62489e-05	0.000211384
	NOD2	1.02663	4.98119e-09	4.67877e-08
	NOC2LP1	1.85955	6.15359e-14	1.12076e-12
	NMUR2	-3.07135	1.55782e-23	8.12409e-22
	NMRAL2P	3.35558	2.67723e-12	4.04301e-11
	NMNAT3	1.2503	1.57018e-12	2.44399e-11
	NMNAT2	-2.13905	1.40028e-14	2.73381e-13
	NME9	-2.60985	1.2218e-47	4.02452e-45
	NME5	-3.48949	2.05946e-25	1.26991e-23
	NMB	1.04055	3.71982e-10	4.18686e-09
	NLRP7	4.97004	7.62135e-30	6.72126e-28
	NLRP6	-1.09905	4.59061e-07	3.09947e-06
	NLRP3P1	2.60969	1.49563e-22	7.10731e-21
	NLRP12	-1.1747	0.00612565	0.0165192
	NLRP11	-2.65875	3.04654e-07	2.13048e-06
	NLRP10	2.78897	1.00664e-12	1.60375e-11
	NLRP1	1.02497	2.47684e-12	3.76251e-11
	NKX6-2	-2.29714	3.44672e-07	2.37967e-06
	NKX2-8	1.51673	8.56765e-06	4.56756e-05
	NKX2-5	1.45236	8.84046e-05	0.000380886
	NKX2-3	1.75918	0.000203159	0.000802045
	NKX2-1-AS1	-2.95686	2.3881e-06	1.42007e-05
	NKX2-1	-4.89961	3.71131e-11	4.80935e-10
	NKG7	1.25846	1.30103e-08	1.14896e-07
	NKAIN4	-3.57003	1.37495e-18	4.25273e-17
	NKAIN3	-1.88784	3.58724e-06	2.05758e-05
	NKAIN2	1.72799	1.9616e-05	9.73198e-05
	NIPAL4	4.99101	3.25599e-70	4.82625e-67
	NIFKP6	-1.10609	2.42275e-07	1.72588e-06
	NHLRC4	-1.57693	1.73519e-13	3.02728e-12
	NHLRC3	-1.02248	4.78601e-27	3.40939e-25
	NHLH2	2.88857	5.26821e-30	4.766e-28
	NHEG1	1.88385	0.0155655	0.0370684
	NGFR	2.13149	9.09997e-21	3.53176e-19
	NGF	1.36492	2.67062e-06	1.57567e-05
	NGB	2.97113	7.12373e-32	7.46036e-30
	NFE2	-1.03746	0.00162469	0.00514748
	NFATC4	-1.33	1.12168e-10	1.36324e-09
	NEXN	1.16978	9.49689e-10	1.0055e-08
	NEUROD1	-4.30189	2.05749e-16	5.00276e-15
	NEURL3	-1.27446	2.00867e-06	1.21221e-05
	NEURL1	1.14918	7.52291e-05	0.000329087
	NEU4	-3.12393	1.83127e-23	9.47318e-22
	NEU2	1.99373	0.00353888	0.0102222
	NELL2	1.51271	4.363e-11	5.59553e-10
	NEK6	-1.25545	4.20684e-17	1.11046e-15
	NEK5	-2.75346	7.38682e-52	3.12836e-49
	NEK4P1	1.73559	0.000969536	0.0032528
	NEK3	-1.20337	6.86808e-23	3.35049e-21
	NEK11	-1.05854	3.16062e-10	3.59525e-09
	NEK10	-1.58909	6.6602e-18	1.92845e-16
	NEIL1	-1.19673	1.97102e-12	3.03238e-11
	NEFM	1.91351	1.64604e-05	8.29888e-05
	NEFL	2.90849	2.73202e-21	1.11897e-19
	NECTIN4-AS1	1.21075	3.71918e-12	5.50859e-11
	NECTIN4	1.53151	5.57901e-26	3.61969e-24
	NECTIN3	-1.88925	5.73648e-15	1.17532e-13
	NECTIN1-AS1	1.31632	2.30159e-07	1.64749e-06
	NECTIN1	2.34831	5.37135e-52	2.30007e-49
	NEB	-2.0274	9.77625e-10	1.03196e-08
	NDUFB4P6	-1.092	0.000641799	0.00225767
	NDUFB1P2	-1.04362	0.00028931	0.00110481
	NDUFAF4P3	-1.11362	1.39163e-07	1.03437e-06
	NDUFA4L2	3.30825	1.47798e-32	1.63678e-30
	NDUFA3P4	-1.49253	8.35056e-09	7.62251e-08
	NDST3	-1.24891	3.80468e-06	2.17421e-05
	NDST1-AS1	1.15368	1.89025e-05	9.41803e-05
	NDRG4	2.66962	2.61036e-24	1.45587e-22
	NDRG1	1.67213	2.74144e-19	9.11581e-18
	NDNF	-3.0334	2.1651e-18	6.5495e-17
	NCR3LG1	-1.33317	1.73759e-06	1.0589e-05
	NCMAP-DT	-2.62868	2.11407e-17	5.79474e-16
	NCMAP	-3.12943	4.13949e-21	1.66179e-19
	NCKAP5-IT1	1.27004	0.0078939	0.0206147
	NCKAP5-AS2	1.04194	0.00290016	0.00858905
	NCKAP5	1.12029	8.26518e-08	6.40007e-07
	NCF1	1.05177	4.98029e-10	5.50431e-09
	NCCRP1	3.26411	1.08592e-28	8.79208e-27
	NCAPGP2	-2.28392	3.12407e-06	1.81871e-05
	NCAPGP1	-1.34137	1.87978e-10	2.20734e-09
	NCAPD2P1	-2.31056	0.000509907	0.00183691
	NCAM2	2.34222	4.01813e-10	4.5029e-09
	NCALD	-1.86894	1.91038e-18	5.8247e-17
	NBEAP1	1.79161	1.5237e-06	9.36705e-06
	NBEA	-2.36242	1.28978e-15	2.8633e-14
	NAT8L	-1.32521	0.00140732	0.00453067
	NAT8	-1.71655	0.00318675	0.00932458
	NAT2	-2.73544	1.49727e-18	4.62367e-17
	NAT1	-1.60848	2.37406e-25	1.45924e-23
	NAPSA	-5.0315	9.17562e-11	1.12941e-09
	NANOGP7	-2.06974	5.6881e-10	6.23475e-09
	MYT1	-1.38646	0.000704276	0.00245385
	MYRIP	-2.55925	4.31418e-20	1.54664e-18
	MYRFL	-2.43312	4.10655e-14	7.61609e-13
	MYRF-AS1	-3.62672	1.5185e-46	4.60798e-44
	MYRF	-3.16169	7.27531e-34	9.0739e-32
	MYOZ1	-1.27621	7.54811e-07	4.90303e-06
	MYOSLID	3.84034	1.14414e-47	3.83426e-45
	MYOM3	-1.81908	7.23307e-10	7.83021e-09
	MYOM1	-1.8273	1.22474e-20	4.6872e-19
	MYO7B	-4.84301	2.04122e-36	3.04909e-34
	MYO6	-1.01072	9.56787e-16	2.16776e-14
	MYO5C	-1.15999	1.31281e-11	1.81929e-10
	MYO5A	1.29791	5.65258e-22	2.50973e-20
	MYO1A	-5.32655	1.60724e-67	1.67409e-64
	MYO15B	-1.85364	2.07998e-26	1.40632e-24
	MYO15A	-1.72641	1.5059e-20	5.68422e-19
	MYMK	-1.31794	0.00097898	0.00328277
	MYLK3	-2.61841	1.81598e-28	1.44004e-26
	MYL7	2.77335	9.57813e-16	2.16881e-14
	MYL3	-1.31494	2.16857e-07	1.55864e-06
	MYL10	-1.13332	3.44466e-05	0.000161974
	MYHAS	1.44989	3.12378e-11	4.08647e-10
	MYH7B	1.63399	0.00240247	0.00728357
	MYH11	1.09957	0.000106825	0.000450478
	MYEF2	-2.03575	1.13847e-10	1.38278e-09
	MYCNOS	-1.06006	0.00122177	0.00399745
	MYCN	-1.44897	8.46064e-06	4.51488e-05
	MYCL-AS1	1.34298	6.10657e-08	4.8285e-07
	MYCL	1.63912	3.66338e-18	1.08436e-16
	MYBPC2	-1.72741	1.07764e-06	6.82852e-06
	MYB-AS1	-1.1307	0.000124562	0.000516184
	MYB	-1.27595	4.58636e-10	5.09084e-09
	MYADML2	-3.49937	1.05516e-18	3.31146e-17
	MYADM-AS1	-1.85353	1.8862e-09	1.89303e-08
	MYADM	-1.14781	5.48363e-06	3.04285e-05
	MXRA5Y	1.10334	6.54998e-05	0.000289882
	MXD1	1.71114	6.37488e-24	3.43611e-22
	MX1	1.03535	1.01704e-08	9.14075e-08
	MUCL3	-1.51426	2.09481e-14	3.99861e-13
	MUCL1	3.98954	1.17632e-10	1.42651e-09
	MUC6	-2.59849	2.70875e-06	1.59597e-05
	MUC5B	-3.98754	1.14799e-13	2.04164e-12
	MUC5AC	-4.29948	2.66488e-13	4.5283e-12
	MUC3A	-3.89671	1.73968e-20	6.51559e-19
	MUC22	1.58466	5.3829e-13	8.79404e-12
	MUC21	1.79758	5.34984e-05	0.000241397
	MUC2	-5.16511	2.6417e-23	1.34846e-21
	MUC17	-6.47762	2.81181e-30	2.60491e-28
	MUC16	-2.22895	1.62846e-09	1.65591e-08
	MUC13	-4.38754	3.39686e-17	9.07219e-16
	MUC1	-1.72826	1.36992e-10	1.63859e-09
	MTURN	-1.43634	2.44838e-20	8.97793e-19
	MTSS1	2.49329	1.0118e-38	1.7486e-36
	MTRNR2L1	-1.64857	0.00232051	0.00706456
	MTRF1LP2	2.81784	4.52443e-27	3.22902e-25
	MTNR1A	-2.67398	3.48314e-11	4.53656e-10
	MTND4P9	-1.42519	1.90486e-09	1.90977e-08
	MTND4P20	-2.26986	9.75385e-06	5.14162e-05
	MTND4LP13	-1.01178	0.00980133	0.0248564
	MTND2P40	-1.41091	1.01673e-09	1.07089e-08
	MTND1P23	2.34715	4.38434e-17	1.15573e-15
	MTMR9LP	-1.35199	1.12107e-18	3.5074e-17
	MTMR11	-1.07288	5.30742e-11	6.73059e-10
	MTHFD2P1	2.56199	0.0206737	0.0473097
	MTFR2P2	1.4096	0.000137698	0.000564502
	MTCYBP18	1.06767	2.42597e-05	0.000118138
	MTCO2P16	1.28646	0.000894776	0.00302463
	MTCO1P40	1.83901	8.53914e-09	7.78358e-08
	MTATP6P16	1.65771	0.001656	0.00523593
	MTAPP1	-1.13191	7.87246e-05	0.00034317
	MT4	7.70308	3.21217e-05	0.000151783
	MT2P1	1.66373	1.88014e-12	2.90183e-11
	MT2A	1.50908	8.6348e-14	1.55358e-12
	MT1XP1	1.55565	8.43506e-16	1.919e-14
	MT1X	2.11979	7.21646e-29	5.94263e-27
	MT1L	1.05917	4.83964e-09	4.55247e-08
	MSX1	-2.06072	3.11854e-11	4.08238e-10
	MST1R	-1.11757	1.66084e-09	1.68662e-08
	MST1L	-1.04937	5.36518e-06	2.98324e-05
	MSN	1.38836	4.53245e-26	2.97068e-24
	MSLNL	-1.15111	1.57179e-05	7.95788e-05
	MSLN	-1.57211	8.12579e-05	0.000352949
	MSI1	-1.32467	0.00056366	0.00200952
	MSH5-SAPCD1	-1.10615	1.14065e-11	1.58871e-10
	MSH5	-1.00585	3.13323e-10	3.5662e-09
	MSH2-OT1	-1.07589	6.04384e-05	0.000269618
	MSGN1	3.15932	4.01129e-12	5.92077e-11
	MS4A8	-4.72563	1.25706e-13	2.22126e-12
	MS4A1	1.45878	9.68854e-07	6.19112e-06
	MRPS9-AS2	-1.18952	3.88239e-05	0.000180705
	MRPS21P9	-1.13923	0.00354368	0.0102338
	MRPL42P4	-1.35352	0.00880849	0.0226525
	MRPL23-AS1	-1.64928	4.05299e-06	2.30415e-05
	MRPL15P1	-1.01161	0.000127314	0.000526174
	MROH2A	3.56853	1.64888e-14	3.18631e-13
	MROCKI	-1.72457	1.36061e-14	2.66581e-13
	MRGPRX4	1.299	0.00390982	0.0111508
	MRGPRX3	3.23239	1.17521e-34	1.55107e-32
	MRAP2	-2.17036	1.11089e-12	1.76183e-11
	MPV17L	-2.43267	2.96247e-16	7.10459e-15
	MPPED1	1.12019	0.000877414	0.00297429
	MPIG6B	1.16649	1.11765e-08	9.97566e-08
[truncated: 4,442 more rows]
